# Supplementary material for: Rh(iii)-catalyzed selective C2 C–H acyloxylation of indoles
Source: Royal Society of Chemistry journal article supplement (doi:10.1039/d3cc05799b), 2023-12-01

## Supporting Information

### Table of Contents

|                                                                                                          |           |
|----------------------------------------------------------------------------------------------------------|-----------|
| <b>I. General Experimental Information. ....</b>                                                         | <b>2</b>  |
| <b>II. Experimental Procedures for the Preparation of Starting Materials.....</b>                        | <b>2</b>  |
| <b>III. Optimization of Reaction Conditions .....</b>                                                    | <b>2</b>  |
| <b>IV. Synthesis and Characterization of Compounds 2.....</b>                                            | <b>3</b>  |
| <b>V.           Scale-up           Synthesis           and           Further<br/>Transformation.....</b> | <b>15</b> |
| <b>VI. Mechanistic Studies.....</b>                                                                      | <b>16</b> |
| <b>VII. <sup>1</sup>H NMR and <sup>13</sup>C NMR Spectrum.....</b>                                       | <b>21</b> |

## I. General Experimental Information

The raw materials and solvents used in the reaction are all analytically pure. If there is no other instructions, they can be used directly.  $^1\text{H}$  NMR and  $^{13}\text{C}$  NMR were measured using a Bruker Avance (400 MHz and 100 MHz) and nuclear magnetic resonance instrument with TMS as an internal standard and were fully decoupled by broad band proton decoupling. The multiplicities are reported as follows: singlet (s), doublet (d), doublet of doublets (dd), multiplet (m), triplet (t) and broad resonances (br). High-resolution mass spectrometry was measured by APEXM Fourier Transform Ion Cyclotron Resonance Mass Spectrometer.

## II. Experimental Procedures for the Preparation of Starting Materials

Take **1a** as an example: Indole (2.4 mmol), 8-bromoquinoline (2 mmol), CuI (5 mol%),  $\text{K}_3\text{PO}_4$  (4.2 mmol), trans-N, N'-dimethyl-1, 2-cyclohexaneamine (20 mol%) was dissolved in DMF (1.0 M) and reacted at 110 °C in an argon atmosphere for 24 hours. After the reaction is completed, it is cooled to room temperature, and the organic substance obtained by washing with ethyl acetate is dried with anhydrous sodium sulfate, then concentrated under reduced pressure, and purified by column chromatography to obtain the target product.

## III. Optimization of Reaction Conditions

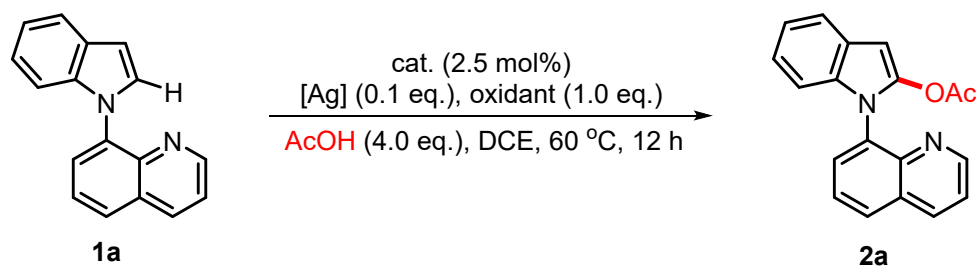

| entry <sup>a</sup> | cat.                                        | [Ag]                   | oxidant        | AcOH | yield (%) <sup>b</sup> |
|--------------------|---------------------------------------------|------------------------|----------------|------|------------------------|
| 1                  | $[\text{Cp}^*\text{IrCl}_2]_2$              | AgOAc                  | $\text{MnO}_2$ | AcOH | nr                     |
| 2                  | $\text{Pd}(\text{OAc})_2$                   | AgOAc                  | $\text{MnO}_2$ | AcOH | nr                     |
| 3                  | $[\text{Ru}(p\text{-cymene})\text{Cl}_2]_2$ | AgOAc                  | $\text{MnO}_2$ | AcOH | nr                     |
| 4                  | /                                           | AgOAc                  | $\text{MnO}_2$ | AcOH | nr                     |
| 5                  | $[\text{Cp}^*\text{RhCl}_2]_2$              | AgOAc                  | $\text{MnO}_2$ | AcOH | 75                     |
| 6                  | $[\text{Cp}^*\text{RhCl}_2]_2$              | $\text{Ag}_2\text{CO}$ | $\text{MnO}_2$ | AcOH | 73                     |

|    |                                      |                    |                                              |                |       |
|----|--------------------------------------|--------------------|----------------------------------------------|----------------|-------|
| 7  | [Cp*RhCl <sub>2</sub> ] <sub>2</sub> | Ag <sub>2</sub> O  | MnO <sub>2</sub>                             | AcOH           | 69    |
| 8  | [Cp*RhCl <sub>2</sub> ] <sub>2</sub> | AgTFA              | MnO <sub>2</sub>                             | AcOH           | 38    |
| 9  | [Cp*RhCl <sub>2</sub> ] <sub>2</sub> | AgF                | MnO <sub>2</sub>                             | AcOH           | 68    |
| 10 | [Cp*RhCl <sub>2</sub> ] <sub>2</sub> | AgSbF <sub>6</sub> | MnO <sub>2</sub>                             | AcOH           | trace |
| 11 | [Cp*RhCl <sub>2</sub> ] <sub>2</sub> | /                  | MnO <sub>2</sub>                             | AcOH           | 34    |
| 12 | [Cp*RhCl <sub>2</sub> ] <sub>2</sub> | AgOAc              | Mn(OAc) <sub>3</sub> ·2H <sub>2</sub> O      | AcOH           | 59    |
| 13 | [Cp*RhCl <sub>2</sub> ] <sub>2</sub> | AgOAc              | Mn(OAc) <sub>2</sub> ·4H <sub>2</sub> O      | AcOH           | 64    |
| 14 | [Cp*RhCl <sub>2</sub> ] <sub>2</sub> | AgOAc              | K <sub>2</sub> S <sub>2</sub> O <sub>8</sub> | AcOH           | nr    |
| 15 | [Cp*RhCl <sub>2</sub> ] <sub>2</sub> | AgOAc              | MnO <sub>2</sub> (2.0 eq.)                   | AcOH           | 46    |
| 16 | [Cp*RhCl <sub>2</sub> ] <sub>2</sub> | AgOAc              | MnO <sub>2</sub> (1.5 eq.)                   | AcOH           | 65    |
| 17 | [Cp*RhCl <sub>2</sub> ] <sub>2</sub> | AgOAc              | MnO <sub>2</sub> (0.5 eq.)                   | AcOH           | 52    |
| 18 | [Cp*RhCl <sub>2</sub> ] <sub>2</sub> | AgOAc              | MnO <sub>2</sub>                             | AcOH (5.0 eq.) | 73    |
| 19 | [Cp*RhCl <sub>2</sub> ] <sub>2</sub> | AgOAc              | MnO <sub>2</sub>                             | AcOH (3.0 eq.) | 80    |
| 20 | [Cp*RhCl <sub>2</sub> ] <sub>2</sub> | AgOAc              | MnO <sub>2</sub>                             | AcOH (2.0 eq.) | 83    |
| 21 | [Cp*RhCl <sub>2</sub> ] <sub>2</sub> | AgOAc              | MnO <sub>2</sub>                             | AcOH (1.0 eq.) | 74    |

<sup>a</sup>Reaction conditions: **1a** (0.1 mmol), AcOH (4.0 eq.), [Cp\*RhCl<sub>2</sub>]<sub>2</sub> (2.5 mol%), AgOAc (0.1 eq.), MnO<sub>2</sub> (1.0 eq.), DCE (0.5 mL), 60 °C (oil bath), 12 h. <sup>b</sup> Isolated yield by flash column chromatography.

## IV. Synthesis and Characterization of Compounds 2

An oven-dried Schlenk tube was charged with **1** (0.1 mmol, 24.4 mg), [Cp\*RhCl<sub>2</sub>]<sub>2</sub> (0.0025 mmol, 1.6 mg), AgOAc (0.01 mmol, 1.67 mg), MnO<sub>2</sub> (0.10 mmol, 8.69 mg), AcOH (0.20 mmol, 12 mg) and DCE (0.5 mL). The Schlenk tube was then sealed with a Teflon lined cap and the mixture was heated at 60 °C (oil bath) for 12 hours followed by cooling to ambient temperature. The resulting mixture was quenched by filtered through a celite pad and concentrated in vacuo. The residue was purified by flash column chromatography on silica gel using petroleum ether/EtOAc as the eluent to afford the product **2**.

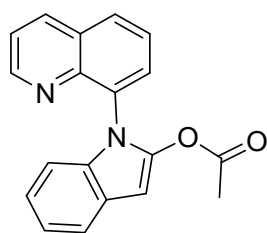

**1-(Quinolin-8-yl)-1H-indol-2-yl acetate (2aa)**

Eluent: petroleum ether/ethyl acetate (10:1). Eluent: petroleum ether/ethyl acetate (10:1). Yellow oil. Isolated yield: 83% (25.1 mg).  $^1\text{H NMR}$  (400 MHz,  $\text{CDCl}_3$ )  $\delta$  8.88-8.87 (m, 1H), 8.28-8.26 (m, 1H), 7.98-7.96 (m, 1H), 7.84-7.82 (m, 1H), 7.71-7.65 (m, 2H), 7.47-7.44 (m, 1H), 7.18-7.14 (m, 1H), 7.11-7.07 (m, 1H), 6.96 (d,  $J = 8.1$  Hz, 1H), 6.55 (s, 1H), 1.89 (s, 3H).  $^{13}\text{C NMR}$  (100 MHz,  $\text{CDCl}_3$ )  $\delta$  167.2, 151.1, 144.7, 143.3, 136.1, 134.1, 133.4, 129.3, 128.7, 126.7, 126.2, 121.9, 121.7, 120.7, 120.6, 110.1, 89.9, 20.7. **HRMS** (ESI)  $m/z$  calcd for  $\text{C}_{19}\text{H}_{15}\text{N}_2\text{O}_2$  ( $\text{M}+\text{H}$ ) $^+$ : 303.1128, found: 303.1131.

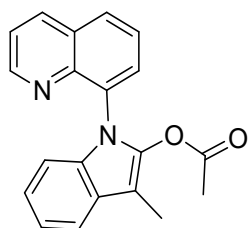

**3-Methyl-1-(quinolin-8-yl)-1H-indol-2-yl acetate (2ba)**

Eluent: petroleum ether/ethyl acetate (10:1). Yellow oil. Isolated yield: 89% (28.1 mg).  $^1\text{H NMR}$  (400 MHz,  $\text{CDCl}_3$ )  $\delta$  8.90-8.89 (m, 1H), 7.95-7.93 (m, 1H), 7.78-7.76 (m, 1H), 7.68-7.61 (m, 2H), 7.47-7.44 (m, 1H), 7.19-7.15 (m, 1H), 7.11-7.07 (m, 1H), 6.92 (d,  $J = 8.1$  Hz, 1H), 2.30 (s, 3H), 1.90 (s, 3H).  $^{13}\text{C NMR}$  (100 MHz,  $\text{CDCl}_3$ )  $\delta$  167.9, 151.1, 144.8, 139.8, 136.2, 134.3, 133.7, 129.3, 128.5, 127.4, 126.3, 121.8, 120.0, 118.9, 110.2, 98.4, 77.4, 77.1, 76.8, 20.3, 8.0. **HRMS** (ESI)  $m/z$  calcd for  $\text{C}_{20}\text{H}_{17}\text{N}_2\text{O}_2$  ( $\text{M}+\text{H}$ ) $^+$ : 317.1285, found: 317.1287.

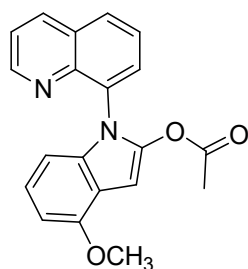

**4-Methoxy-1-(quinolin-8-yl)-1H-indol-2-yl acetate (2ca)**

Eluent: petroleum ether/ethyl acetate (5:1). Yellow oil. Isolated yield: 62% (20.6 mg).  $^1\text{H NMR}$  (400 MHz,  $\text{CDCl}_3$ )  $\delta$  8.88-8.87 (m, 1H), 8.27-8.24 (m, 1H), 7.97-7.95 (m, 1H), 7.83-7.81 (m, 1H), 7.70-7.66 (m, 1H), 7.46-7.43 (m, 1H), 7.03-6.99 (m, 1H), 6.64 (s, 1H), 6.61-6.56 (m, 2H), 3.98 (s, 3H), 1.88 (s, 3H);  $^{13}\text{C NMR}$  (100 MHz,  $\text{CDCl}_3$ )  $\delta$  167.3, 153.4, 151.1, 144.7, 142.0, 136.1, 135.3, 133.5, 129.4, 129.3, 128.8, 126.2, 122.3, 121.9, 117.1, 103.6, 101.0, 87.4, 55.5, 20.6. **HRMS** (ESI)  $m/z$  calcd for  $\text{C}_{20}\text{H}_{17}\text{N}_2\text{O}_3$  ( $\text{M}+\text{H}$ ) $^+$ : 333.1234, found: 333.1239.

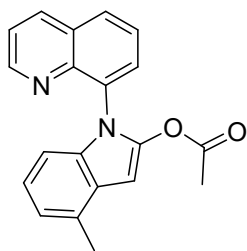

**4-Methyl-1-(quinolin-8-yl)-1H-indol-2-yl acetate (2da)**

Eluent: petroleum ether/ethyl acetate (10:1). Yellow oil. Isolated yield: 84% (26.5 mg). **<sup>1</sup>H NMR** (400 MHz, CDCl<sub>3</sub>) δ 8.89-8.87 (m, 1H), 8.28-8.25 (m, 1H), 7.98-7.95 (m, 1H), 7.84-7.82 (m, 1H), 7.71-7.67 (m, 1H), 7.47-7.44 (m, 1H), 7.03-6.95 (m, 2H), 6.57 (d, *J* = 7.9 Hz, 1H), 6.91 (s, 1H), 2.61 (s, 3H), 1.89 (s, 3H). **<sup>13</sup>C NMR** (100 MHz, CDCl<sub>3</sub>) δ 167.3, 151.1, 144.7, 142.8, 136.1, 133.7, 133.6, 130.1, 129.3, 128.7, 126.4, 126.2, 121.9, 121.8, 121.0, 107.7, 88.3, 20.6, 18.8. **HRMS** (ESI) *m/z* calcd for C<sub>20</sub>H<sub>17</sub>N<sub>2</sub>O<sub>2</sub> (M+H)<sup>+</sup>: 317.1285, found: 317.1284.

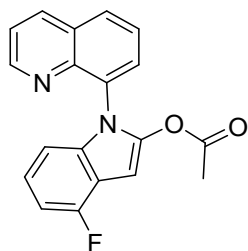

**4-Fluoro-1-(quinolin-8-yl)-1H-indol-2-yl acetate (2ea)**

Eluent: petroleum ether/ethyl acetate (10:1). Yellow oil. Isolated yield: 63% (20.2 mg). **<sup>1</sup>H NMR** (400 MHz, CDCl<sub>3</sub>) δ 8.88-8.87 (m, 1H), 8.29-8.27 (m, 1H), 8.00-7.98 (m, 1H), 7.83-7.81 (m, 1H), 7.72-7.68 (m, 1H), 7.49-7.46 (m, 1H), 7.02-6.96 (m, 1H), 6.86-6.81 (m, 1H), 6.72 (d, *J* = 8.2 Hz, 1H), 6.63 (s, 1H), 1.89 (s, 3H); **<sup>13</sup>C NMR** (100 MHz, CDCl<sub>3</sub>) δ 167.0, 157.6 (d, *J* = 244.8 Hz), 151.3, 144.6, 142.9, 136.4 (d, *J* = 11.1 Hz), 136.2, 133.2, 129.4, 129.3, 129.1, 126.2, 122.0 (d, *J* = 3.9 Hz), 122.0, 115.7, (d, *J* = 22.9 Hz), 106.3 (d, *J* = 3.5 Hz), 105.7 (d, *J* = 18.9 Hz), 86.1, 20.6. **<sup>19</sup>F NMR** (376 MHz, CDCl<sub>3</sub>) δ -123.4. **HRMS** (ESI) *m/z* calcd for C<sub>19</sub>H<sub>14</sub>FN<sub>2</sub>O<sub>2</sub> (M+H)<sup>+</sup>: 321.1034, found: 321.1037.

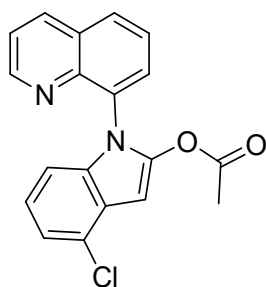

**4-Chloro-1-(quinolin-8-yl)-1H-indol-2-yl acetate (2fa)**

Eluent: petroleum ether/ethyl acetate (5:1). Yellow oil. Isolated yield: 70% (23.5 mg). **<sup>1</sup>H NMR** (400 MHz, CDCl<sub>3</sub>) δ 8.88-8.86 (m, 1H), 8.29-8.27 (m, 1H), 8.01-7.98 (m, 1H), 7.82-7.80 (m, 1H), 7.72-7.68 (m, 1H), 7.49-7.47 (m, 1H), 7.16 (d, *J* = 7.6 Hz, 1H), 7.02-6.98 (m, 1H), 6.83 (d, *J* = 8.2 Hz, 1H), 6.67 (s, 1H), 1.90 (s, 3H); **<sup>13</sup>C NMR** (100 MHz, CDCl<sub>3</sub>) δ 166.9, 151.3, 144.5, 143.6, 136.2, 129.4, 129.3, 129.2, 126.2, 122.2, 122.0, 120.5, 108.8, 88.7, 20.6. **HRMS** (ESI) *m/z* calcd for C<sub>19</sub>H<sub>14</sub>ClN<sub>2</sub>O<sub>2</sub> (M+H)<sup>+</sup>: 337.0738, found: 337.0742.

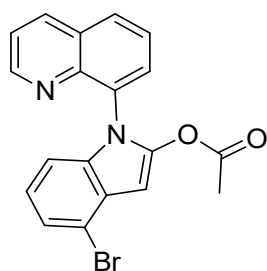

**4-Bromo-1-(quinolin-8-yl)-1*H*-indol-2-yl acetate (2ga)**

Eluent: petroleum ether/ethyl acetate (5:1). Yellow oil. Isolated yield: 83% (31.5 mg). **<sup>1</sup>H NMR** (400 MHz, CDCl<sub>3</sub>) δ 8.88-8.86 (m, 1H), 8.29-8.27 (m, 1H), 8.01-7.98 (m, 1H), 7.82-7.80 (m, 1H), 7.72-7.68 (m, 1H), 7.49-7.46 (m, 1H), 7.33-7.31 (m, 1H), 6.96-6.92 (m, 1H), 6.87 (d, *J* = 8.2 Hz, 1H), 6.62 (s, 1H), 1.90 (s, 3H); **<sup>13</sup>C NMR** (100 MHz, CDCl<sub>3</sub>) δ 166.9, 151.3, 144.5, 143.6, 136.2, 134.3, 133.0, 129.4, 129.3, 129.2, 127.5, 126.2, 123.6, 122.5, 122.0, 114.9, 109.3, 90.3, 20.7. **HRMS** (ESI) *m/z* calcd for C<sub>19</sub>H<sub>14</sub>BrN<sub>2</sub>O<sub>2</sub> (M+H)<sup>+</sup>: 381.0233, found: 381.0235.

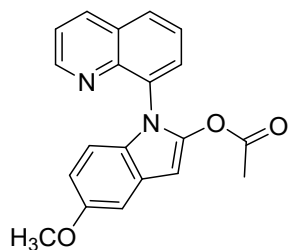

**5-Methoxy-1-(quinolin-8-yl)-1*H*-indol-2-yl acetate (2ha)**

Eluent: petroleum ether/ethyl acetate (5:1). Yellow oil. Isolated yield: 80% (26.6 mg). **<sup>1</sup>H NMR** (400 MHz, CDCl<sub>3</sub>) δ 8.88-8.87 (m, 1H), 8.27-8.24 (m, 1H), 7.96-7.94 (m, 1H), 7.82-7.79 (m, 1H), 7.70-7.66 (m, 1H), 7.46-7.43 (m, 1H), 7.14 (d, *J* = 2.5 Hz, 1H), 6.85 (d, *J* = 8.8 Hz, 1H), 6.75-6.73 (m, 1H), 6.48 (s, 1H), 3.86 (s, 3H), 1.88 (s, 3H); **<sup>13</sup>C NMR** (100 MHz, CDCl<sub>3</sub>) δ 167.3, 156.2, 151.2, 144.7, 142.5, 136.1, 134.8, 133.5, 129.4, 129.3, 128.8, 126.2, 121.9, 121.4, 120.7, 109.8, 94.6, 89.6, 55.7, 20.7. **HRMS** (ESI) *m/z* calcd for C<sub>20</sub>H<sub>17</sub>N<sub>2</sub>O<sub>3</sub> (M+H)<sup>+</sup>: 333.1234, found: 333.1238.

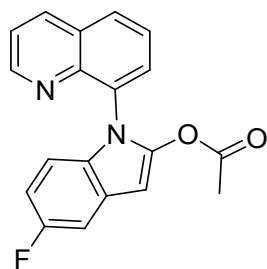

**5-Fluoro-1-(quinolin-8-yl)-1H-indol-2-yl acetate (2ia)**

Eluent: petroleum ether/ethyl acetate (10:1). Yellow oil. Isolated yield: 59% (18.9 mg). **<sup>1</sup>H NMR** (400 MHz, CDCl<sub>3</sub>) δ 8.88-8.87 (m, 1H), 8.29-8.27 (m, 1H), 8.00-7.97 (m, 1H), 7.82-7.80 (m, 1H), 7.72-7.68 (m, 1H), 7.49-7.45 (m, 1H), 7.33-7.30 (m, 1H), 6.87-6.79 (m, 2H), 6.52 (s, 1H), 1.90 (s, 3H); **<sup>13</sup>C NMR** (100MHz, CDCl<sub>3</sub>) δ 167.0, 158.5 (d, *J* = 233.1 Hz), 151.2, 144.6, 144.4, 136.2, 133.2, 130.6, 129.3, 129.3, 128.9, 127.1 (d, *J* = 10.7 Hz), 126.2, 122.0, 111.0 (d, *J* = 9.5 Hz), 109.8 (d, *J* = 25.6 Hz), 105.8 (d, *J* = 24.1 Hz), 90.1 (d, *J* = 4.2 Hz), 20.6. **<sup>19</sup>F NMR** (376 MHz, CDCl<sub>3</sub>) δ -123.7. **HRMS** (ESI) *m/z* calcd for C<sub>19</sub>H<sub>14</sub>FN<sub>2</sub>O<sub>2</sub> (M+H)<sup>+</sup>: 321.1034, found: 321.1038.

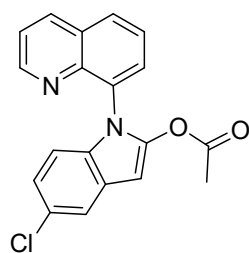

**5-Chloro-1-(quinolin-8-yl)-1H-indol-2-yl acetate (2ja)**

Eluent: petroleum ether/ethyl acetate (5:1). Yellow oil. Isolated yield: 61% (20.5 mg). **<sup>1</sup>H NMR** (400 MHz, CDCl<sub>3</sub>) δ 8.87-8.86 (m, 1H), 8.29-8.26 (m, 1H), 8.00-7.98 (m, 1H), 7.81-7.79 (m, 1H), 7.71-7.68 (m, 1H), 7.62 (d, *J* = 1.9 Hz, 1H), 7.48-7.45 (m, 1H), 7.05-7.02 (m, 1H), 6.85 (d, *J* = 8.7 Hz, 1H), 6.51 (s, 1H), 1.90 (s, 3H); **<sup>13</sup>C NMR** (100 MHz, CDCl<sub>3</sub>) δ 166.9, 151.3, 144.5, 144.2, 136.2, 133.0, 132.5, 129.3, 129.3, 129.1, 127.7, 126.2, 126.2, 122.0, 121.9, 120.1, 111.3, 89.6, 20.6. **HRMS** (ESI) *m/z* calcd for C<sub>19</sub>H<sub>14</sub>ClN<sub>2</sub>O<sub>2</sub> (M+H)<sup>+</sup>: 337.0738, found: 337.0740.

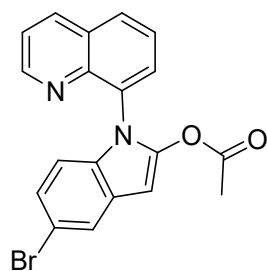

**5-Bromo-1-(quinolin-8-yl)-1H-indol-2-yl acetate (2ka)**

Eluent: petroleum ether/ethyl acetate (5:1). Yellow oil. Isolated yield: 52% (19.8 mg). **<sup>1</sup>H NMR** (400 MHz, CDCl<sub>3</sub>) δ 8.87-8.85 (m, 1H), 8.29-8.27 (m, 1H), 8.00-7.98 (m, 1H), 7.81-7.79 (m, 2H), 7.72-7.68 (m, 1H), 7.49-7.46 (m, 1H), 7.18-7.15 (m, 1H), 6.80 (d, *J* = 8.7 Hz, 1H), 6.50 (s, 1H), 1.90 (s, 3H); **<sup>13</sup>C NMR** (100 MHz, CDCl<sub>3</sub>) δ 166.9, 151.3, 144.5, 144.0, 136.2, 132.95, 132.7, 129.3, 129.3, 129.1, 128.3, 126.2, 124.5, 123.1, 122.0, 113.7, 111.7, 89.4, 20.6. **HRMS** (ESI) *m/z* calcd for C<sub>19</sub>H<sub>14</sub>BrN<sub>2</sub>O<sub>2</sub> (M+H)<sup>+</sup>: 381.0233, found: 381.0237.

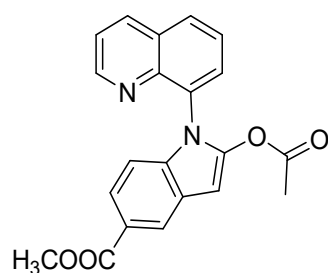

**Methyl 2-acetoxy-1-(quinolin-8-yl)-1H-indole-5-carboxylate (2la)**

Eluent: petroleum ether/ethyl acetate (5:1). Yellow oil. Isolated yield: 50% (18 mg). **<sup>1</sup>H NMR** (400 MHz, CDCl<sub>3</sub>) δ 8.86-8.85 (m, 1H), 8.42 (d, *J* = 1.2 Hz, 1H), 8.29-8.27 (m, 1H), 8.01-7.98 (m, 1H), 7.82-7.79 (m, 2H), 7.72-7.69 (m, 1H), 7.48-7.46 (m, 1H), 6.94 (d, *J* = 8.6 Hz, 1H), 6.63 (s, 1H), 3.92 (s, 3H), 1.89 (s, 3H); **<sup>13</sup>C NMR** (100 MHz, CDCl<sub>3</sub>) δ 168.1, 166.9, 151.3, 144.5, 144.2, 136.7, 136.2, 132.8, 129.3, 129.2, 126.2, 126.2, 123.5, 123.2, 122.6, 122.1, 109.9, 90.8, 51.9, 20.6. **HRMS** (ESI) *m/z* calcd for C<sub>21</sub>H<sub>17</sub>N<sub>2</sub>O<sub>4</sub> (M+H)<sup>+</sup>: 361.1183, found: 361.1187.

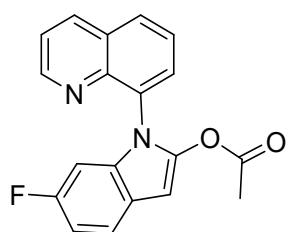

**6-Fluoro-1-(quinolin-8-yl)-1H-indol-2-yl acetate (2ma)**

Eluent: petroleum ether/ethyl acetate (10:1). Yellow oil. Isolated yield: 68% (21.8 mg). **<sup>1</sup>H NMR** (400 MHz, CDCl<sub>3</sub>) δ 8.87-8.85 (m, 1H), 8.27-8.24 (m, 1H), 7.98-7.96 (m, 1H), 7.79-7.77 (m, 1H), 7.69-7.65 (m, 1H), 7.55-7.52 (m, 1H), 7.47-7.44 (m, 1H), 6.91-6.86 (m, 1H), 6.60-6.58 (m, 1H), 6.49 (s, 1H), 3.92 (s, 1H), 1.89 (s, 3H). **<sup>13</sup>C NMR** (100 MHz, CDCl<sub>3</sub>) δ 167.2, 159.7 (d, *J* = 235.3 Hz), 151.3, 144.5, 143.4, 136.2, 133.0, 129.4, 129.2, 129.0, 126.2, 122.9, 122.0, 121.5 (d, *J* = 9.6 Hz), 121.4, 109.1 (d, *J* = 24.0



Hz), 97.0 (d,  $J = 26.8$  Hz), 89.8, 20.6.  $^{19}\text{F}$  NMR (376 MHz,  $\text{CDCl}_3$ )  $\delta$  -120.8. HRMS (ESI)  $m/z$  calcd for  $\text{C}_{19}\text{H}_{14}\text{FN}_2\text{O}_2$  ( $\text{M}+\text{H}$ ) $^+$ : 321.1034, found: 321.1036.

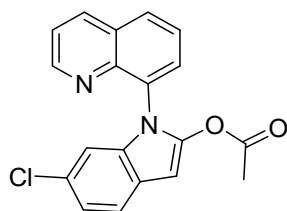

**6-Chloro-1-(quinolin-8-yl)-1H-indol-2-yl acetate (2na)**

Eluent: petroleum ether/ethyl acetate (5:1). Yellow oil. Isolated yield: 72% (24.2 mg).  $^1\text{H}$  NMR (400 MHz,  $\text{CDCl}_3$ )  $\delta$  8.88-8.86 (m, 1H), 8.28-8.26 (m, 1H), 8.00-7.97 (m, 1H), 7.81-7.79 (m, 1H), 7.72-7.68 (m, 1H), 7.56 (d,  $J = 8.4$  Hz, 1H), 7.48-7.45 (m, 1H), 7.13-7.10 (m, 1H), 6.92 (d,  $J = 1.5$  Hz, 1H), 6.54 (s, 1H), 1.89 (s, 3H);  $^{13}\text{C}$  NMR (100 MHz,  $\text{CDCl}_3$ )  $\delta$  167.0, 151.3, 144.6, 143.8, 136.2, 134.4, 132.8, 129.3, 129.3, 129.2, 127.4, 126.2, 125.2, 122.0, 121.7, 121.3, 110.2, 89.8, 20.6. HRMS (ESI)  $m/z$  calcd for  $\text{C}_{19}\text{H}_{14}\text{BrN}_2\text{O}_2$  ( $\text{M}+\text{H}$ ) $^+$ : 381.0233, found: 381.0238.

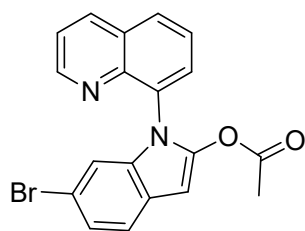

**6-Bromo-1-(quinolin-8-yl)-1H-indol-2-yl acetate (2oa)**

Eluent: petroleum ether/ethyl acetate (5:1). Yellow oil. Isolated yield: 73% (27.7 mg).  $^1\text{H}$  NMR (400 MHz,  $\text{CDCl}_3$ )  $\delta$  8.88-8.86 (m, 1H), 8.28-8.26 (m, 1H), 8.00-7.98 (m, 1H), 7.82-7.79 (m, 1H), 7.72-7.68 (m, 1H), 7.52 (d,  $J = 8.4$  Hz, 1H), 7.49-7.46 (m, 1H), 7.27-7.24 (m, 1H), 7.07 (d,  $J = 1.5$  Hz, 1H), 6.53 (s, 1H), 1.88 (s, 3H);  $^{13}\text{C}$  NMR (100 MHz,  $\text{CDCl}_3$ )  $\delta$  166.9, 151.3, 144.6, 143.7, 136.2, 134.8, 132.8, 129.4, 129.2, 126.2, 125.6, 123.9, 122.1, 122.0, 114.9, 113.1, 89.9, 20.6. HRMS (ESI)  $m/z$  calcd for  $\text{C}_{19}\text{H}_{14}\text{BrN}_2\text{O}_2$  ( $\text{M}+\text{H}$ ) $^+$ : 381.0233, found: 381.0235.

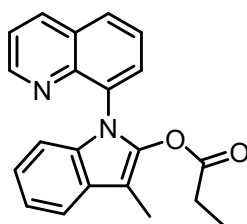

**3-Methyl-1-(quinolin-8-yl)-1H-indol-2-yl propionate (2bb)**

Eluent: petroleum ether/ethyl acetate (5:1). Yellow oil. Isolated yield: 51% (17.0 mg). **<sup>1</sup>H NMR** (400 MHz, Chloroform-*d*)  $\delta$  8.90-8.89 (m, 1H), 8.27-8.24 (m, 1H), 7.94-7.92 (m, 1H), 7.78-7.76 (m, 1H), 7.65 (dd,  $J = 15.7, 7.8$  Hz, 2H), 7.45 (dd,  $J = 8.3, 4.2$  Hz, 1H), 7.19-7.15 (m, 1H), 7.12-7.08 (m, 1H), 6.94 (d,  $J = 8.1$  Hz, 1H), 2.29 (s, 3H), 2.19-2.12 (m, 2H), 0.84 (t,  $J = 7.6$  Hz, 3H). **<sup>13</sup>C NMR** (100 MHz, Chloroform-*d*)  $\delta$  171.4, 151.1, 144.8, 139.9, 136.2, 134.2, 133.7, 129.5, 129.3, 128.4, 127.5, 126.3, 121.8, 121.7, 120.0, 118.8, 110.1, 98.3, 27.1, 8.8, 7.9. **HRMS** (ESI)  $m/z$  calcd for C<sub>21</sub>H<sub>19</sub>N<sub>2</sub>O<sub>2</sub> (M+H)<sup>+</sup>: 331.1441, found: 331.1437.

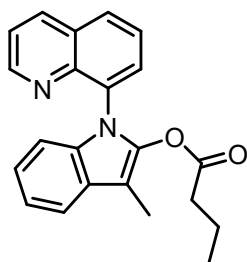

**3-Methyl-1-(quinolin-8-yl)-1H-indol-2-yl butyrate (2bc)**

Eluent: petroleum ether/ethyl acetate (5:1). Yellow oil. Isolated yield: 84% (28.8 mg). **<sup>1</sup>H NMR** (400 MHz, Chloroform-*d*)  $\delta$  8.91-8.89 (m, 1H), 8.27-8.24 (m, 1H), 7.94-7.92 (m, 1H), 7.78-7.76 (m, 1H), 7.67-7.61 (m, 2H), 7.47-7.44 (m, 1H), 7.18-7.14 (m, 1H), 7.11-7.07 (m, 1H), 6.92 (d,  $J = 8.1$  Hz, 1H), 2.28 (s, 3H), 2.14-2.12 (m, 2H), 1.36-1.29 (m, 2H), 0.64 (t,  $J = 7.4$  Hz, 3H). **<sup>13</sup>C NMR** (100 MHz, Chloroform-*d*)  $\delta$  170.6, 151.2, 144.9, 139.9, 136.1, 134.3, 133.7, 129.6, 129.3, 128.5, 127.4, 126.2, 121.8, 121.7, 120.0, 118.8, 110.1, 98.2, 35.5, 18.1, 13.2, 7.9. **HRMS** (ESI)  $m/z$  calcd for C<sub>22</sub>H<sub>21</sub>N<sub>2</sub>O<sub>2</sub> (M+H)<sup>+</sup>: 345.1598, found: 345.1594.

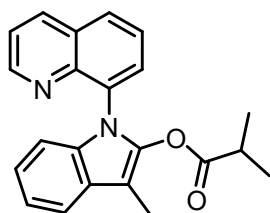

**3-Methyl-1-(quinolin-8-yl)-1H-indol-2-yl isobutyrate (2bd)**

Eluent: petroleum ether/ethyl acetate (5:1). Yellow oil. Isolated yield: 80% (27.6 mg). **<sup>1</sup>H NMR** (400 MHz, Chloroform-*d*)  $\delta$  8.91-8.90 (m, 1H), 8.26-8.24 (m, 1H), 7.94-7.92 (m, 1H), 7.79-7.77 (m, 1H), 7.67-7.61 (m, 2H), 7.47-7.43 (m, 1H), 7.19-7.15 (m, 1H), 7.12-7.08 (m, 1H), 6.95 (d,  $J = 7.9$  Hz, 1H), 2.44-2.37 (m, 1H), 2.27 (s, 3H), 0.84 (d,  $J = 7.0$  Hz, 3H), 0.75 (d,  $J = 7.0$  Hz, 3H). **<sup>13</sup>C NMR** (100 MHz, Chloroform-*d*)  $\delta$  174.0, 151.2, 145.0, 139.9, 136.1, 134.3, 133.7, 129.7, 129.3, 128.8, 128.5, 127.5, 126.2,

121.8, 121.7, 119.9, 118.8, 110.0, 98.1, 33.6, 18.5, 18.3, 7.8. **HRMS** (ESI)  $m/z$  calcd for  $C_{22}H_{21}N_2O_2$  (M+H)<sup>+</sup>: 345.1598, found: 345.1599.

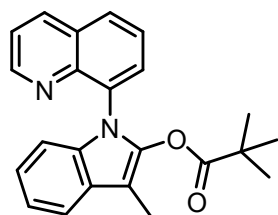

**3-Methyl-1-(quinolin-8-yl)-1H-indol-2-yl pivalate (2be)**

Eluent: petroleum ether/ethyl acetate (10:1). Yellow oil. Isolated yield: 58% (20.9 mg). **<sup>1</sup>H NMR** (400 MHz, Chloroform-*d*)  $\delta$  8.92-8.91 (m, 1H), 8.26-8.23 (m, 1H), 7.93-7.91 (m, 1H), 7.79-7.76 (m, 1H), 7.67-7.60 (m, 2H), 7.47-7.43 (m, 1H), 7.18-7.14 (m, 1H), 7.12-7.08 (m, 1H), 6.96 (d,  $J = 7.6$  Hz, 1H), 2.25 (s, 3H), 0.84 (s, 9H). **<sup>13</sup>C NMR** (100 MHz, Chloroform-*d*)  $\delta$  175.4, 151.1, 145.0, 140.2, 136.1, 133.7, 129.8, 129.3, 128.5, 127.6, 126.2, 121.8, 121.6, 119.9, 118.8, 109.9, 98.0, 38.8, 26.5, 7.8. **HRMS** (ESI)  $m/z$  calcd for  $C_{23}H_{23}N_2O_2$  (M+H)<sup>+</sup>: 359.1754, found: 359.1754.

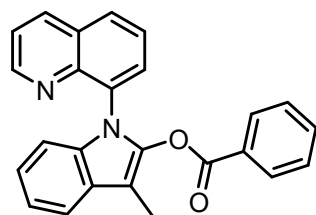

**3-Methyl-1-(quinolin-8-yl)-1H-indol-2-yl benzoate (2bf)**

Eluent: petroleum ether/ethyl acetate (5:1). Yellow oil. Isolated yield: 83% (31.3 mg). **<sup>1</sup>H NMR** (400 MHz, CDCl<sub>3</sub>)  $\delta$  8.88-8.86 (m, 1H), 8.18-8.16 (m, 1H), 7.87-7.83 (m, 1H), 7.68-7.67 (m, 1H), 7.66-7.65 (m, 1H), 7.61 (t,  $J = 7.8$  Hz, 1H), 7.50-7.46 (m, 1H), 7.36 (dd,  $J = 8.3, 4.2$  Hz, 1H), 7.30-7.26 (m, 2H), 7.21-7.18 (m, 1H), 7.16-7.12 (m, 1H), 7.03-7.00 (m, 1H), 2.35 (s, 3H); **<sup>13</sup>C NMR** (100 MHz, CDCl<sub>3</sub>)  $\delta$  163.6, 151.1, 144.7, 139.9, 136.1, 134.2, 133.7, 133.6, 130.0, 129.3, 129.2, 128.5, 128.4, 128.3, 127.6, 126.3, 121.8, 121.7, 120.1, 118.9, 110.2, 98.7, 8.1. **HRMS** (ESI)  $m/z$  calcd for  $C_{25}H_{19}N_2O_2$  (M+H)<sup>+</sup>: 379.1441, found: 379.1443.

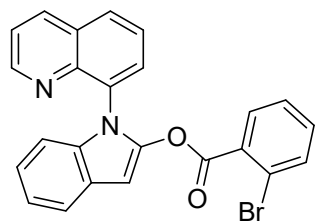

**1-(Quinolin-8-yl)-1H-indol-2-yl 2-bromobenzoate (2ag)**

Eluent: petroleum ether/ethyl acetate (5:1). Yellow oil. Isolated yield: 67% (29.5 mg). **<sup>1</sup>H NMR** (400 MHz, Chloroform-*d*)  $\delta$  8.86-8.85 (m, 1H), 8.25-8.22 (m, 1H), 7.96-7.91

(m, 2H), 7.73-7.67 (m, 2H), 7.54 (d,  $J = 9.1$  Hz, 1H), 7.42-7.39 (m, 1H), 7.22-7.17 (m, 2H), 7.15-7.10 (m, 2H), 7.05-7.02 (m, 1H), 6.79 (s, 1H).  $^{13}\text{C}$  NMR (100 MHz, Chloroform- $d$ )  $\delta$  161.5, 151.3, 144.9, 143.4, 136.1, 134.7, 134.1, 133.5, 133.2, 131.6, 129.9, 129.6, 129.3, 128.8, 126.9, 126.9, 126.3, 122.6, 121.9, 120.9, 120.8, 110.0, 90.0. HRMS (ESI)  $m/z$  calcd for  $\text{C}_{24}\text{H}_{16}\text{BrN}_2\text{O}_2$  ( $\text{M}+\text{H}$ ) $^+$ : 442.0390, found: 442.0384.

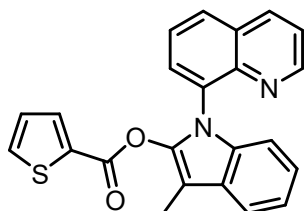

### 3-Methyl-1-(quinolin-8-yl)-1H-indol-2-yl thiophene-2-carboxylate (2bh)

Eluent: petroleum ether/ethyl acetate (5:1). Yellow oil. Isolated yield: 97% (37.3 mg).  $^1\text{H}$  NMR (400 MHz, Chloroform- $d$ )  $\delta$  8.86-8.84 (m, 1H), 8.20-8.17 (m, 1H), 7.88-7.86 (m, 1H), 7.84-7.82 (m, 1H), 7.66-7.60 (m, 2H), 7.48-7.48 (m, 1H), 7.39-7.36 (m, 1H), 7.21-7.17 (m, 1H), 7.15-7.10 (m, 1H), 6.99 (d,  $J = 8.0$  Hz, 1H), 6.86-6.85 (m, 1H), 6.36-6.34 (m, 1H), 2.35 (s, 3H).  $^{13}\text{C}$  NMR (100 MHz, Chloroform- $d$ )  $\delta$  155.3, 151.0, 147.4, 144.6, 143.0, 139.1, 136.1, 134.2, 133.6, 129.3, 129.2, 128.3, 127.5, 126.3, 122.0, 121.7, 120.1, 119.5, 119.0, 112.0, 110.2, 99.0, 8.0. HRMS (ESI)  $m/z$  calcd for  $\text{C}_{23}\text{H}_{17}\text{N}_2\text{O}_2\text{S}$  ( $\text{M}+\text{H}$ ) $^+$ : 385.1005, found: 385.1012.

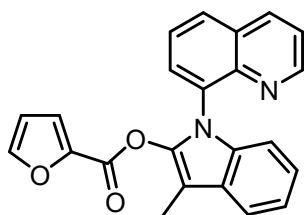

### 3-Methyl-1-(quinolin-8-yl)-1H-indol-2-yl furan-2-carboxylate (2bi)

Eluent: petroleum ether/ethyl acetate (5:1). Yellow oil. Isolated yield: 77% (28.5 mg).  $^1\text{H}$  NMR (400 MHz, Chloroform- $d$ )  $\delta$  8.67-8.65 (m, 1H), 8.19-8.16 (m, 1H), 7.87-7.83 (m, 2H), 7.67-7.65 (m, 1H), 7.64-7.60 (m, 2H), 7.59-7.57 (m, 1H), 7.46-7.44 (m, 1H), 7.38-7.35 (m, 1H), 7.22-7.18 (m, 1H), 7.16-7.12 (m, 1H), 7.03 (d,  $J = 8.1$  Hz, 1H), 6.96-6.94 (m, 1H), 2.37 (s, 3H).  $^{13}\text{C}$  NMR (100 MHz, Chloroform- $d$ )  $\delta$  158.9, 151.0, 144.6, 139.6, 136.0, 134.8, 134.1, 133.8, 133.6, 131.6, 129.3, 129.2, 128.3, 127.8, 127.6, 126.2, 121.9, 121.7, 120.1, 119.0, 110.2, 98.9, 8.1. HRMS (ESI)  $m/z$  calcd for  $\text{C}_{23}\text{H}_{17}\text{N}_2\text{O}_3$  ( $\text{M}+\text{H}$ ) $^+$ : 369.1234, found: 369.1229.

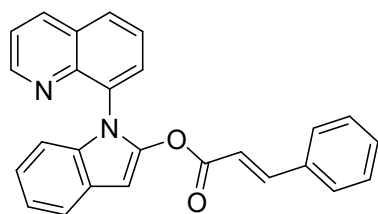

**1-(Quinolin-8-yl)-1H-indol-2-yl cinnamate (2aj)**

Eluent: petroleum ether/ethyl acetate (5:1). Yellow oil. Isolated yield: 65% (25.4 mg). **<sup>1</sup>H NMR** (400 MHz, Chloroform-*d*)  $\delta$  8.89-8.88 (m, 1H), 8.27-8.25 (m, 1H), 7.98-7.96 (m, 1H), 7.90-7.88 (m, 1H), 7.74-7.69 (m, 2H), 7.45-7.42 (m, 1H), 7.39-7.36 (m, 1H), 7.35-7.32 (m, 2H), 7.30-7.28 (m, 3H), 7.20-7.16 (m, 1H), 7.14-7.09 (m, 1H), 7.00 (d,  $J = 8.1$  Hz, 1 H), 6.70 (s, 1H), 6.18 (d,  $J = 16.0$  Hz, 1H). **<sup>13</sup>C NMR** (100 MHz, Chloroform-*d*)  $\delta$  162.9, 151.2, 146.9, 144.8, 143.6, 136.1, 134.1, 133.8, 133.6, 130.8, 129.5, 129.4, 128.9, 128.7, 128.2, 126.9, 126.3, 121.9, 121.7, 120.8, 120.7, 116.2, 110.1, 89.7. **HRMS** (ESI)  $m/z$  calcd for C<sub>26</sub>H<sub>19</sub>N<sub>2</sub>O<sub>2</sub> (M+H)<sup>+</sup>: 391.1441, found: 391.1440.

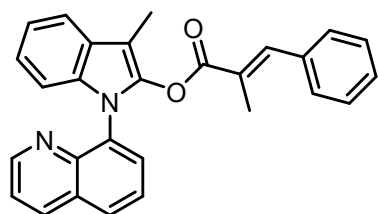

**3-Methyl-1-(quinolin-8-yl)-1H-indol-2-yl (E)-2-methyl-3-phenylacrylate (2bk)**

Eluent: petroleum ether/ethyl acetate (5:1). Yellow oil. Isolated yield: 89% (37.4 mg). **<sup>1</sup>H NMR** (400 MHz, Chloroform-*d*)  $\delta$  8.93-8.92 (m, 1H), 8.24-8.21 (m, 1H), 7.92-7.90 (m, 1H), 7.86-7.84 (m, 1H), 7.68-7.64 (m, 2H), 7.44-7.41 (m, 1H), 7.36-7.30 (m, 4H), 7.22-7.18 (m, 1H), 7.17-7.12 (m, 3H), 7.05-7.03 (m, 1H), 2.37 (s, 3H), 1.86 (d,  $J = 1.5$  Hz, 3H). **<sup>13</sup>C NMR** (100 MHz, Chloroform-*d*)  $\delta$  165.6, 151.0, 144.8, 140.9, 140.2, 136.2, 135.3, 134.1, 133.8, 129.7, 129.4, 129.3, 128.7, 128.4, 128.3, 127.7, 126.7, 126.3, 121.8, 120.0, 118.9, 110.1, 98.6, 13.9, 8.1. **HRMS** (ESI)  $m/z$  calcd for C<sub>28</sub>H<sub>23</sub>N<sub>2</sub>O<sub>2</sub> (M+H)<sup>+</sup>: 419.1754, found: 419.1752.

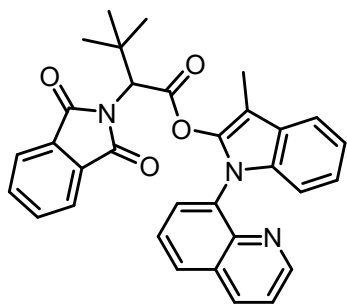

**3-Methyl-1-(quinolin-8-yl)-1H-indol-2-yl 2-(1,3-dioxisoindolin-2-yl)-3,3-dimethylbutanoate (2bj)**

Eluent: petroleum ether/ethyl acetate (5:1). Yellow oil. Isolated yield: 78% (40.2 mg).  $^1\text{H NMR}$  (400 MHz, Chloroform-*d*)  $\delta$  8.73-8.71 (m, 1H), 8.56-8.55 (m, 1H), 8.26-8.24 (m, 1H), 8.05-8.02 (m, 1H), 7.93-7.90 (m, 1H), 7.82-7.80 (m, 2H), 7.78-7.74 (m, 3H), 7.72-7.70 (m, 1H), 7.69-7.66 (m, 2H), 7.63-7.62 (m, 2H), 7.60-7.58 (m, 3H), 7.40-7.36 (m, 1H), 7.27-7.24 (m, 1H), 7.15-7.10 (m, 2H), 7.10-7.04 (m, 2H), 6.96-6.91 (m, 2H), 4.31 (s, 1H), 3.99 (s, 1H), 2.31 (s, 3H), 2.27 (s, 3H), 1.01 (s, 9H), 0.92 (s, 9H).  $^{13}\text{C NMR}$  (100 MHz, Chloroform-*d*)  $\delta$  167.4, 164.8, 164.0, 151.0, 150.8, 144.7, 139.2, 136.0, 135.9, 134.3, 134.1, 134.0, 133.5, 131.6, 131.2, 129.5, 129.3, 129.0, 128.5, 128.4, 127.5, 126.2, 123.6, 123.6, 121.9, 121.8, 121.7, 121.5, 120.0, 119.0, 118.8, 109.8, 109.8, 98.8, 98.3, 59.3, 59.1, 35.8, 35.5, 27.5, 27.4, 8.1, 7.7. **HRMS** (ESI)  $m/z$  calcd for  $\text{C}_{32}\text{H}_{28}\text{N}_3\text{O}_4$  ( $\text{M}+\text{H}$ ) $^+$ : 518.2074, found: 518.2071.

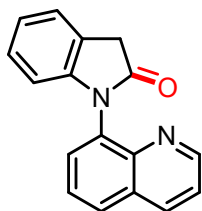

**1-(Quinolin-8-yl)indolin-2-one (2ag-1)**

Eluent: petroleum ether/ethyl acetate (1:1). Red oil. Isolated yield: 58% (30.2 mg).  $^1\text{H NMR}$  (500 MHz, Chloroform-*d*)  $\delta$  8.88-8.87 (m, 1H), 8.24 (d,  $J = 7.8$  Hz, 1H), 7.96 (d,  $J = 8.3$  Hz, 1H), 7.80-7.78 (m, 1H), 7.69 (t,  $J = 7.8$  Hz, 1H), 7.46-7.44 (m, 1H), 7.35 (d,  $J = 7.2$  Hz, 1H), 7.12-7.09 (m, 1H), 7.07-7.04 (m, 1H), 6.34 (d,  $J = 7.8$  Hz, 1H), 3.96 (d,  $J = 22.3$  Hz, 1H), 3.80 (d,  $J = 22.4$  Hz, 1H).  $^{13}\text{C NMR}$  (125 MHz, Chloroform-*d*)  $\delta$  175.8, 151.4, 146.9, 144.6, 136.7, 132.8, 130.2, 130.1, 129.7, 128.0, 126.9, 124.9, 124.8, 122.9, 122.3, 110.1, 36.7. **HRMS** (ESI)  $m/z$  calcd for  $\text{C}_{17}\text{H}_{13}\text{N}_2\text{O}$  ( $\text{M}+\text{H}$ ) $^+$ : 261.1022, found: 261.1017.

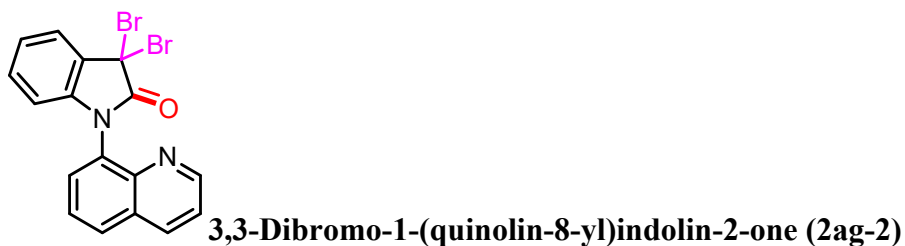

Eluent: petroleum ether/ethyl acetate (5:1). Pink solid. Melting point: 160-162 °C. Isolated yield: 74% (61.5 mg).  $^1\text{H NMR}$  (400 MHz, Chloroform-*d*)  $\delta$  8.86-8.85 (m, 1H), 8.25-8.23 (m, 1H), 8.00-7.98 (m, 1H), 7.84-7.82 (m, 1H), 7.75-7.67 (m, 2H), 7.47-7.44 (m, 1H), 7.20-7.13 (m, 2H), 6.34-6.29 (m, 1H).  $^{13}\text{C NMR}$  (100 MHz, Chloroform-*d*)  $\delta$  169.9, 151.3, 144.0, 141.5, 136.2, 131.3, 130.9, 130.8, 130.0, 129.7, 129.6, 126.4, 125.9, 124.1, 122.2, 110.9, 45.7. **HRMS** (ESI)  $m/z$  calcd for  $\text{C}_{17}\text{H}_{10}\text{Br}_2\text{N}_2\text{O}$  ( $\text{M}+\text{H}$ ) $^+$ : 416.9233, found: 416.9233.

## V. Scale-up Synthesis and Further Transformation

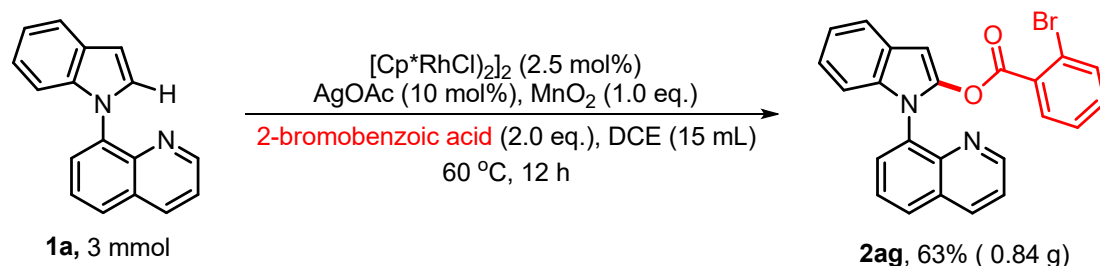

An oven-dried Schlenk tube was charged with **1a** (3 mmol, 0.73 g),  $[\text{Cp}^*\text{RhCl}_2]_2$  (0.075 mmol, 48 mg), AgOAc (0.3 mmol, 50.1 mg),  $\text{MnO}_2$  (3 mmol, 260.7 mg), AcOH (10 mmol, 360 mg) and DCE (15 mL). The Schlenk tube was then sealed with a Teflon lined cap and the mixture was heated at 60 °C (oil bath) for 12 hours followed by cooling to ambient temperature. The resulting mixture was quenched by filtered through a celite pad and concentrated in vacuo. The residue was purified by flash column chromatography on silica gel using petroleum ether/EtOAc as the eluent to afford the product **2ag** in 63% yield (0.84 g).

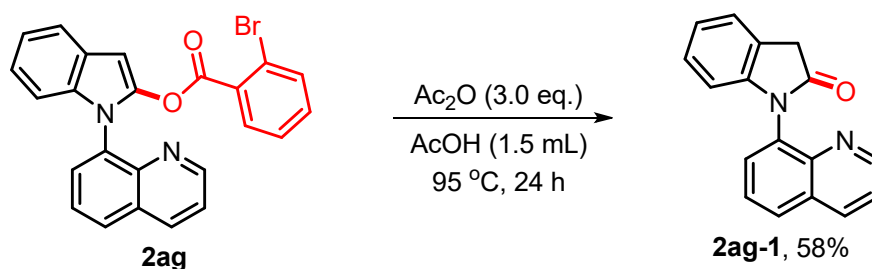

**2ag** (0.3 mmol) was dissolved in acetic acid (1.5 mL) and the reaction mixture was heated to 95 °C for 24 hours. The reaction was then cooled to room temperature, which was then extracted with ethyl acetate. The combined organic layer were dried and concentrated in vacuo. The residue was subjected to column chromatography on silica gel and eluted with petroleum ether/ethyl acetate (1/1, v/v) to afford corresponding product **2ag-1** (58% yield).

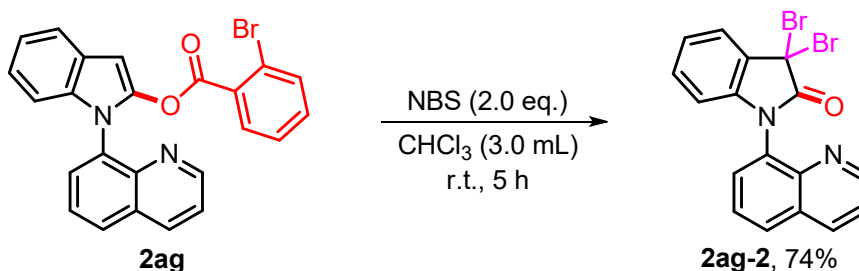

To a solution of **2ag** (0.2 mmol) in  $\text{CHCl}_3$  (3.0 mL), NBS (N-bromosuccinimide) (0.4 mmol) was added portionwisely and then the mixture was heated at rt. under air for 5 h. The reaction solution was concentrated and purified by column chromatography on silica gel to provide the desired product **2ag-2** (74% yield).

## VI. Mechanistic Studies

### *H/D exchange reaction*

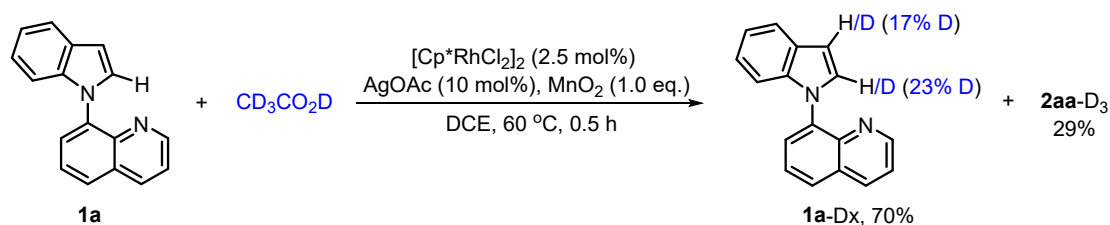

To an oven-dried sealed tube charged with **1a** (0.1 mmol, 24.4 mg),  $[\text{Cp}^*\text{RhCl}_2]_2$  (2.5 mol%, 1.6 mg),  $\text{MnO}_2$  (0.1 mmol, 8.69 mg),  $\text{AgOAc}$  (0.01 mmol, 1.67 mg),  $\text{CD}_3\text{CO}_2\text{D}$  (12  $\mu\text{L}$ , 20 mmol) and DCE (0.5 mL) was added under air atmosphere. The



reaction mixture was then allowed to stir at 60 °C (oil bath) for 0.5 h. The reaction was followed by TLC, cooled after the reaction, diluted with ethyl acetate, filtered through Celite. Then the filtrate was concentrated and purified by flash column chromatography to give **1a-D<sub>x</sub>** in 70% yield.

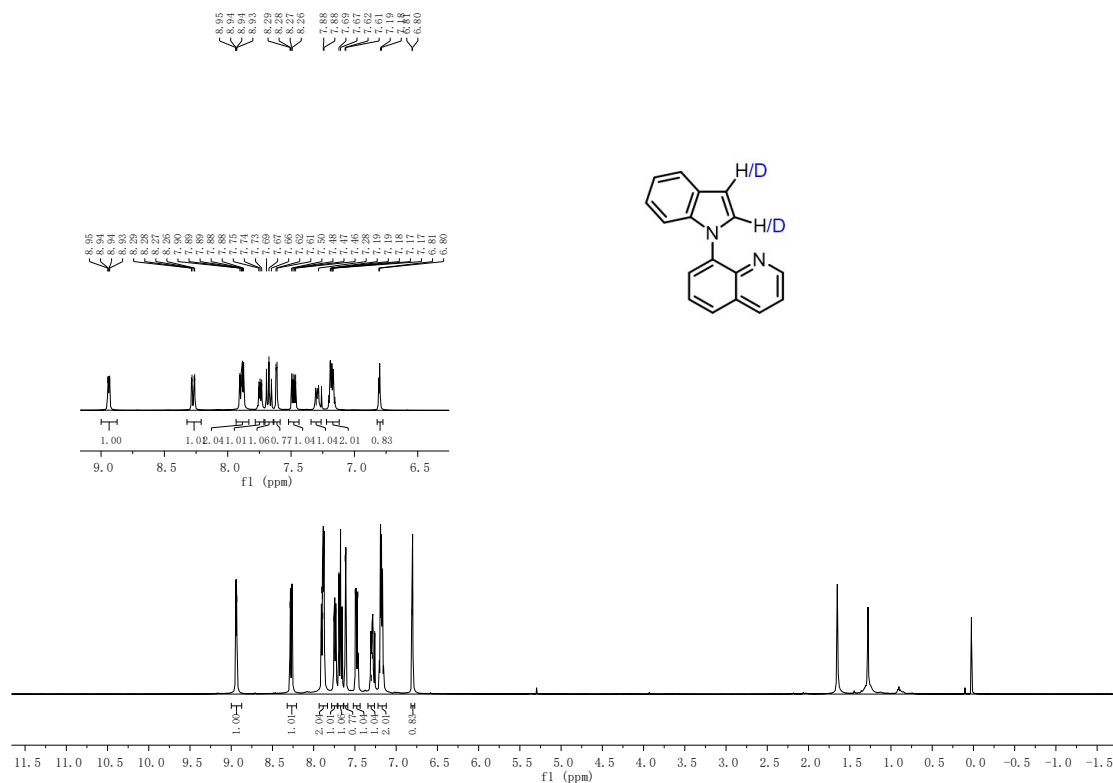

### kinetic isotope effect (parallel)

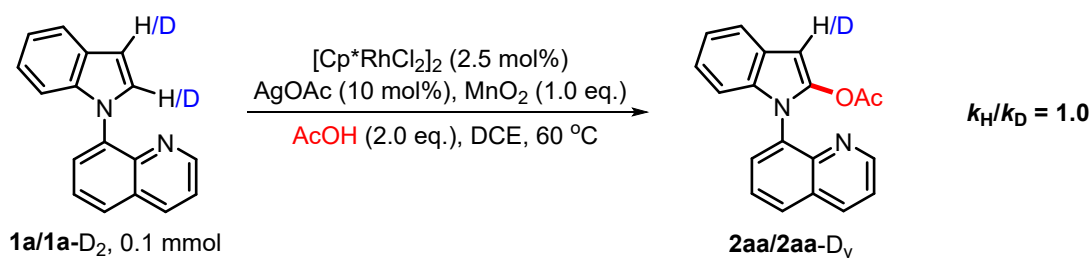

To an oven-dried sealed tube charged with **1a** (0.1 mmol, 24.4 mg) or **1a-D<sub>2</sub>** (0.1 mmol, 26.4 mg), [Cp\**RhCl*<sub>2</sub>]<sub>2</sub> (2.5 mol%, 1.6 mg), MnO<sub>2</sub> (0.1 mmol, 8.69 mg), AgOAc (0.01 mmol, 1.67 mg), AcOH (0.2 mmol, 12 mg) and DCE (0.5 mL) was added under air atmosphere. The reaction mixture was then allowed to stir at 60 °C (oil bath). The reaction was followed by TLC, cooled after the reaction, diluted with ethyl acetate, filtered through Celite. Then the filtrate was concentrated and purified by flash column chromatography to give the product **2aa** or **2aa-D<sub>y</sub>**.

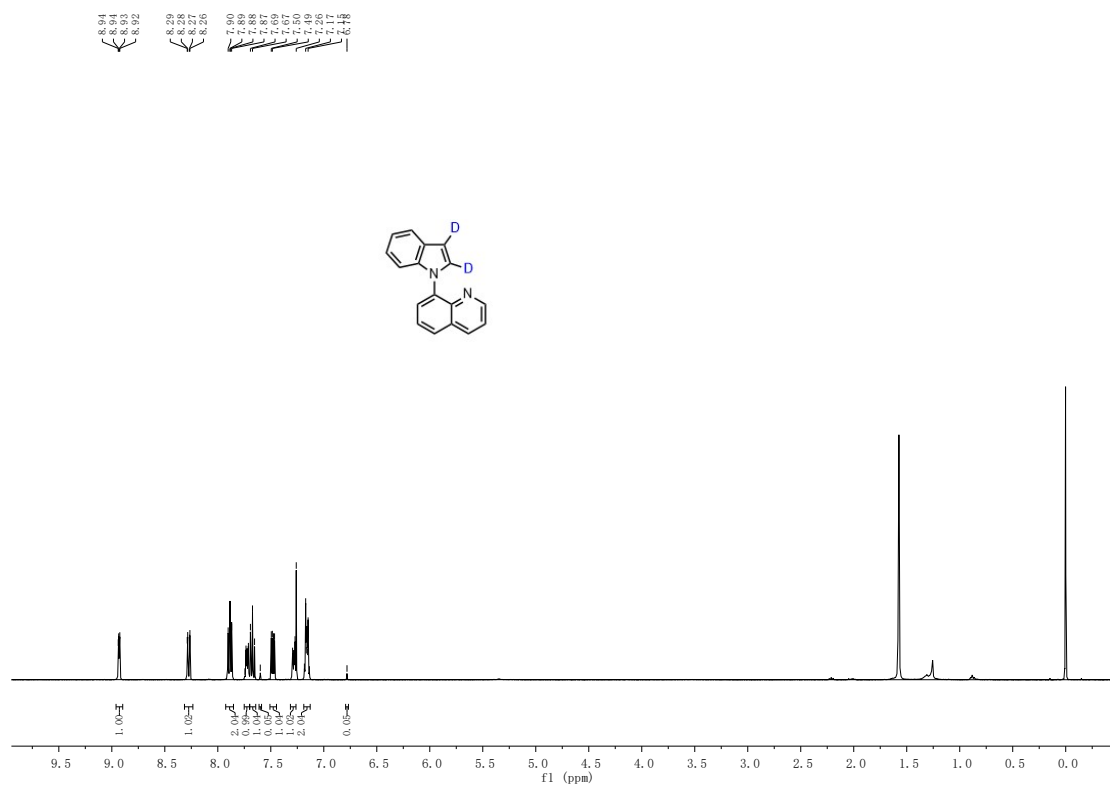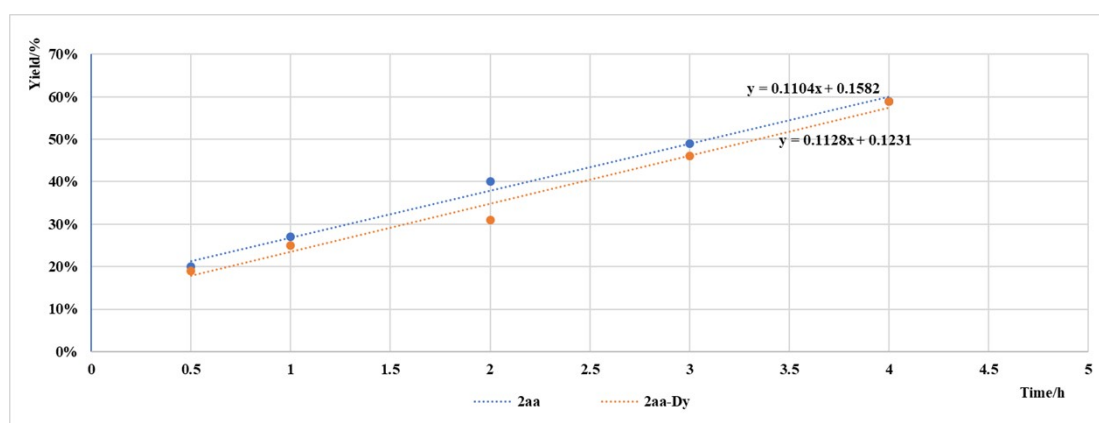

*directing-group variation*

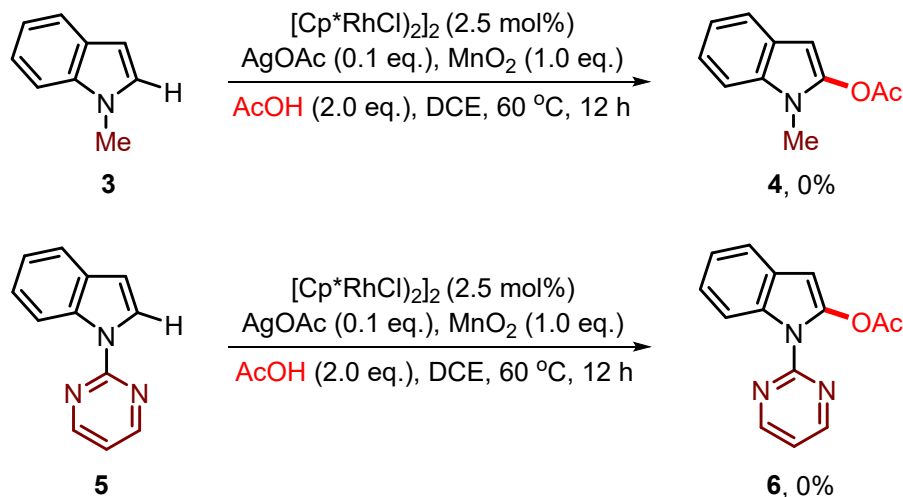

To an oven-dried sealed tube charged with **3** (0.1 mmol, 13.1 mg) or **5** (0.1 mmol, 19.5 mg),  $[\text{Cp}^*\text{RhCl}_2]_2$  (2.5 mol%, 1.6 mg),  $\text{MnO}_2$  (0.1 mmol, 8.69 mg), AgOAc (0.01 mmol, 1.67 mg), AcOH (0.2 mmol, 12 mg) and DCE (0.5 mL) was added under air atmosphere. The reaction mixture was then allowed to stir at 60 °C (oil bath) for 12 h and followed by TLC.

### *catalyst investigation*

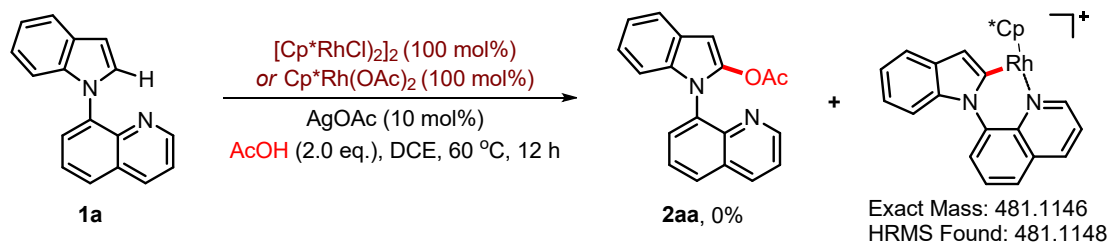

To an oven-dried sealed tube charged with **1a** (0.1 mmol, 24.4 mg),  $[\text{Cp}^*\text{RhCl}_2]_2$  (0.1 mmol, 64 mg) or  $\text{Cp}^*\text{Rh(OAc)}_2$  (0.1 mmol, 35.6 mg), AgOAc (0.01 mmol, 1.67 mg), AcOH (0.2 mmol, 12 mg) and DCE (0.5 mL) was added under air atmosphere. The reaction mixture was then allowed to stir at 60 °C (oil bath) for 12 h and followed by TLC and HRMS.

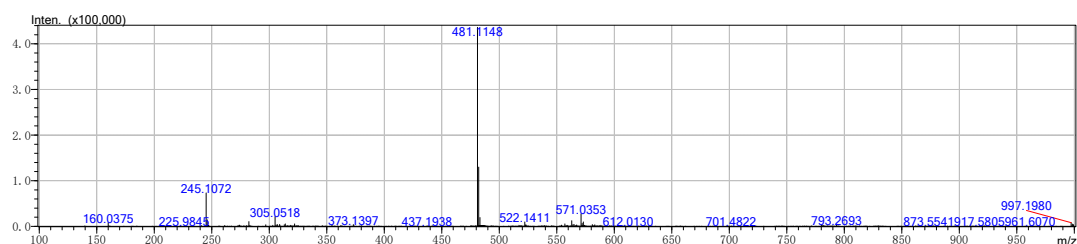

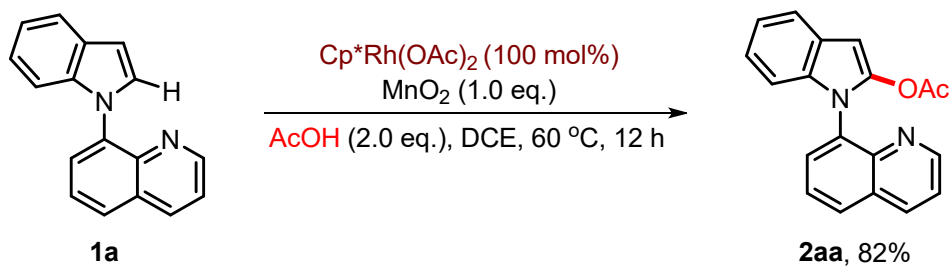

To an oven-dried sealed tube charged with **1a** (0.1 mmol, 24.4 mg)  $[\text{Cp}^*\text{RhCl}_2]_2$  (0.1 mmol, 35.6 mg),  $\text{MnO}_2$  (0.1 mmol, 8.69 mg), AcOH (0.2 mmol, 12 mg) and DCE (0.5 mL) was added under air atmosphere. The reaction mixture was then allowed to stir at 60 °C (oil bath). The reaction was followed by TLC, cooled after the reaction, diluted with ethyl acetate, filtered through Celite. Then the filtrate was concentrated and purified by flash column chromatography to give the product **2aa** in 82% yield.

## VII. <sup>1</sup>H NMR and <sup>13</sup>C NMR Spectrum

### 1-(Quinolin-8-yl)-1H-indol-2-yl acetate (2aa)

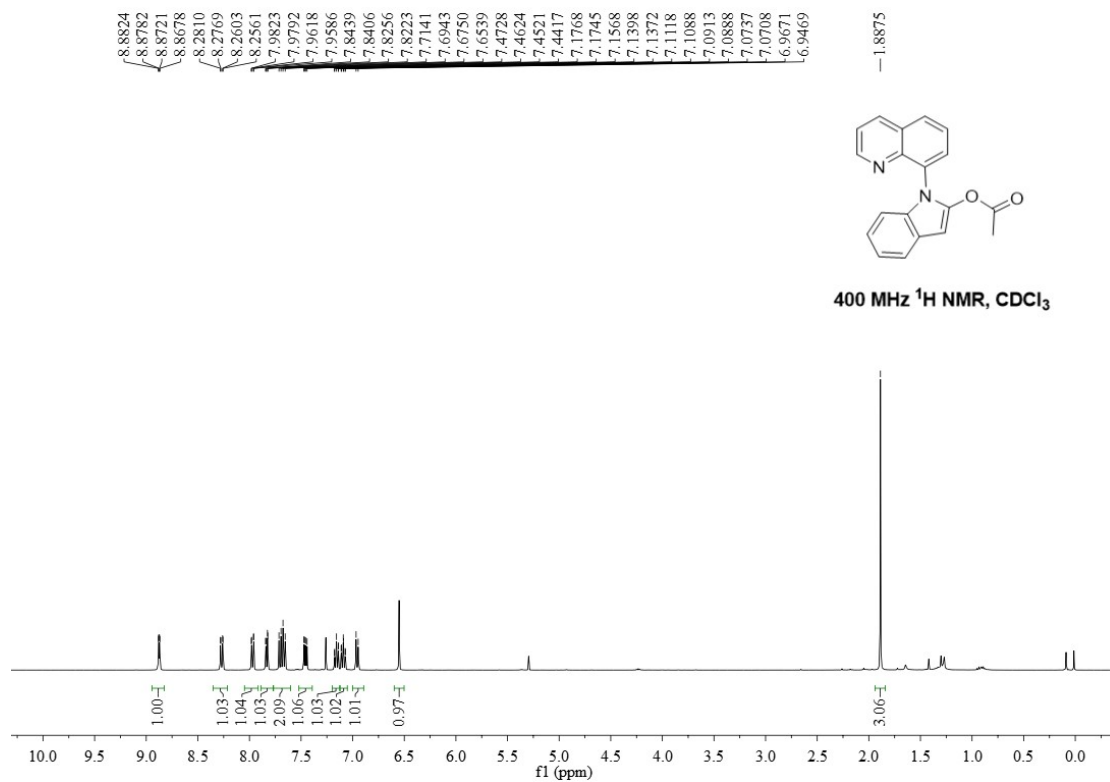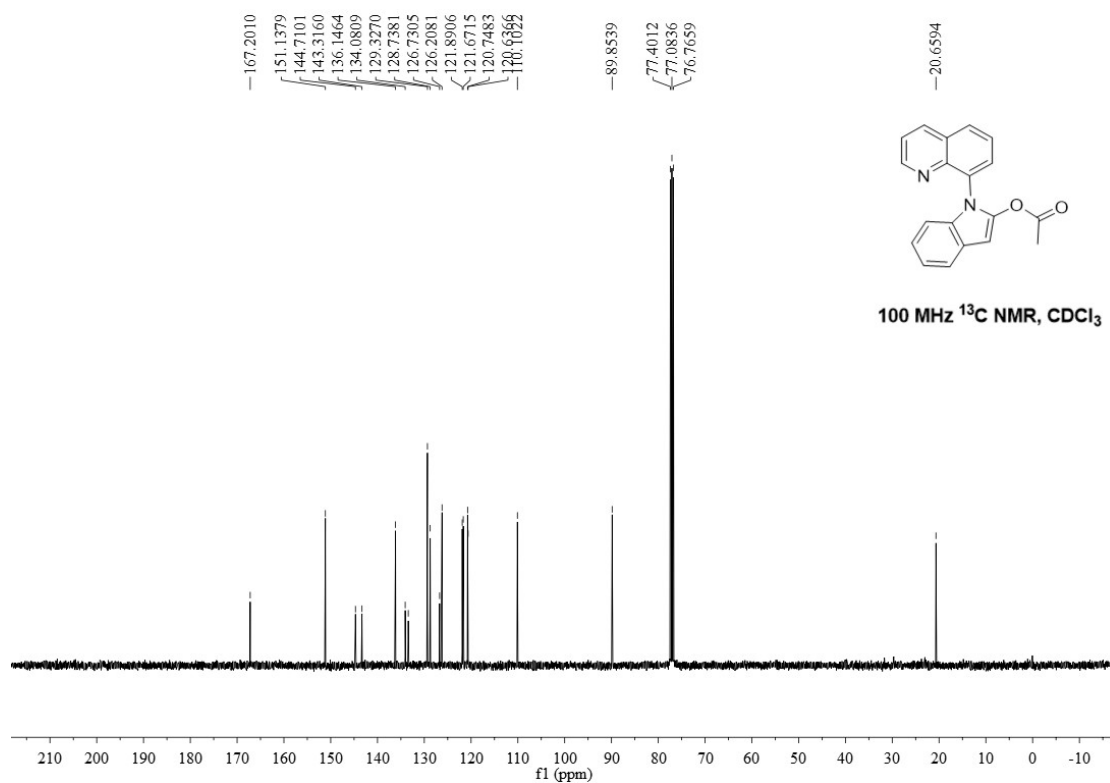

### 3-Methyl-1-(quinolin-8-yl)-1H-indol-2-yl acetate (2ba)

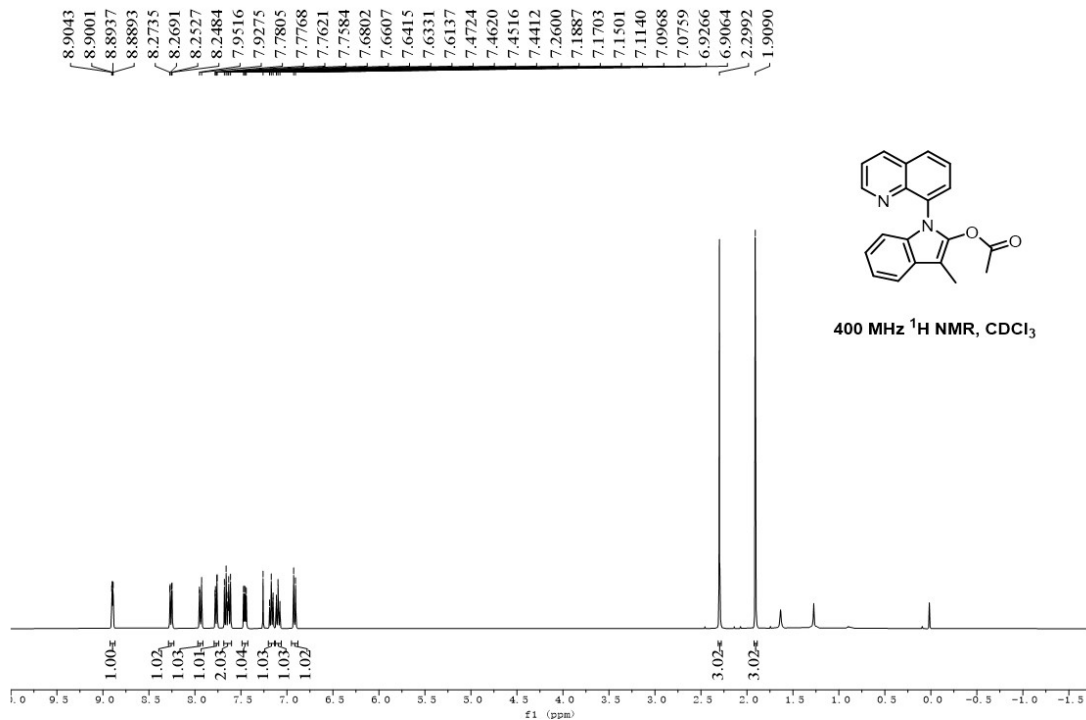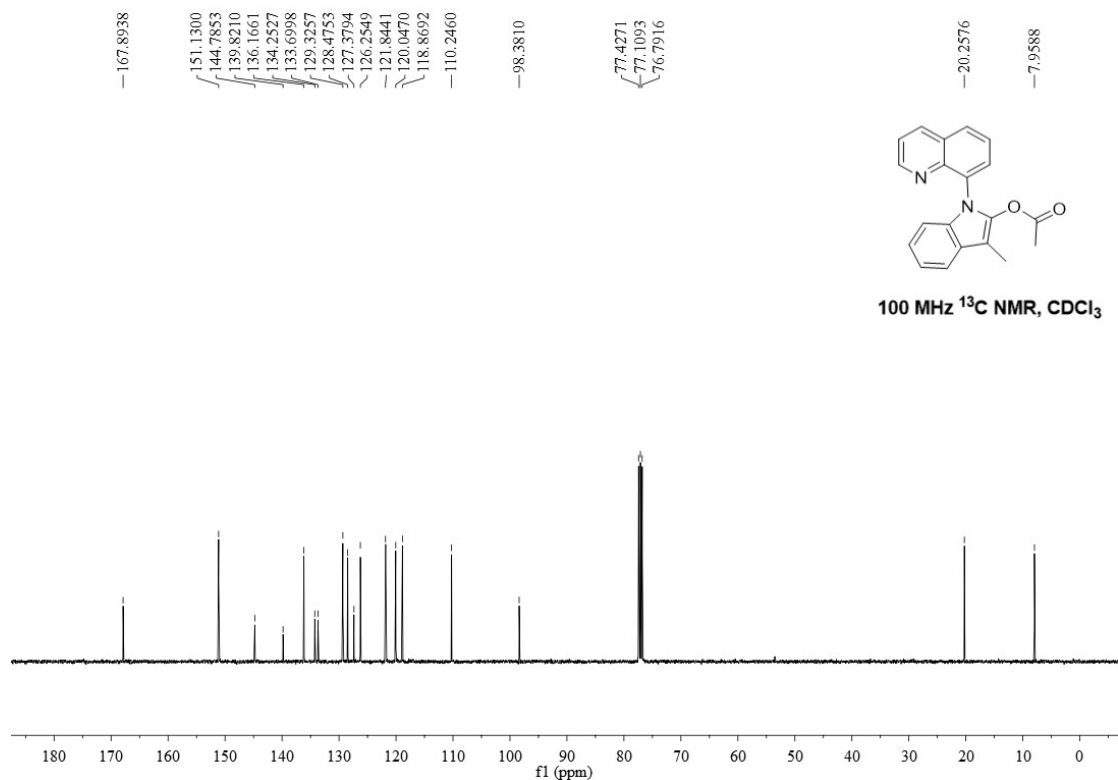

## 4-Methoxy-1-(quinolin-8-yl)-1H-indol-2-yl acetate (2ca)

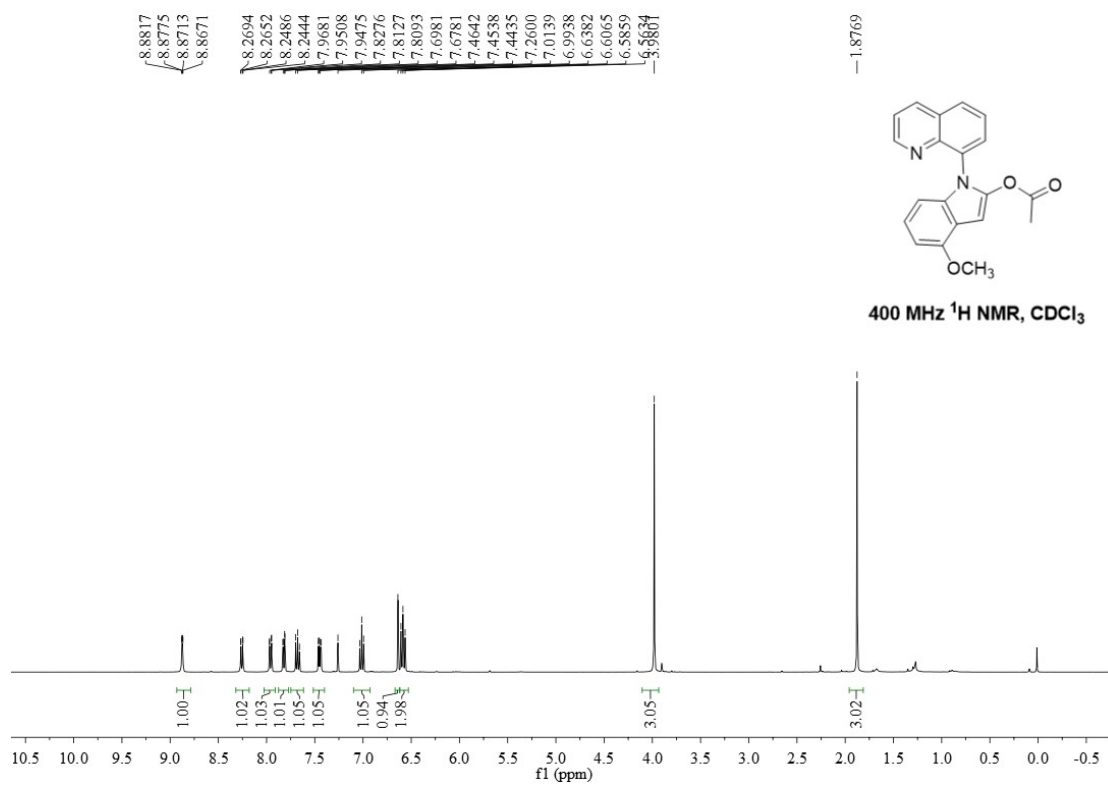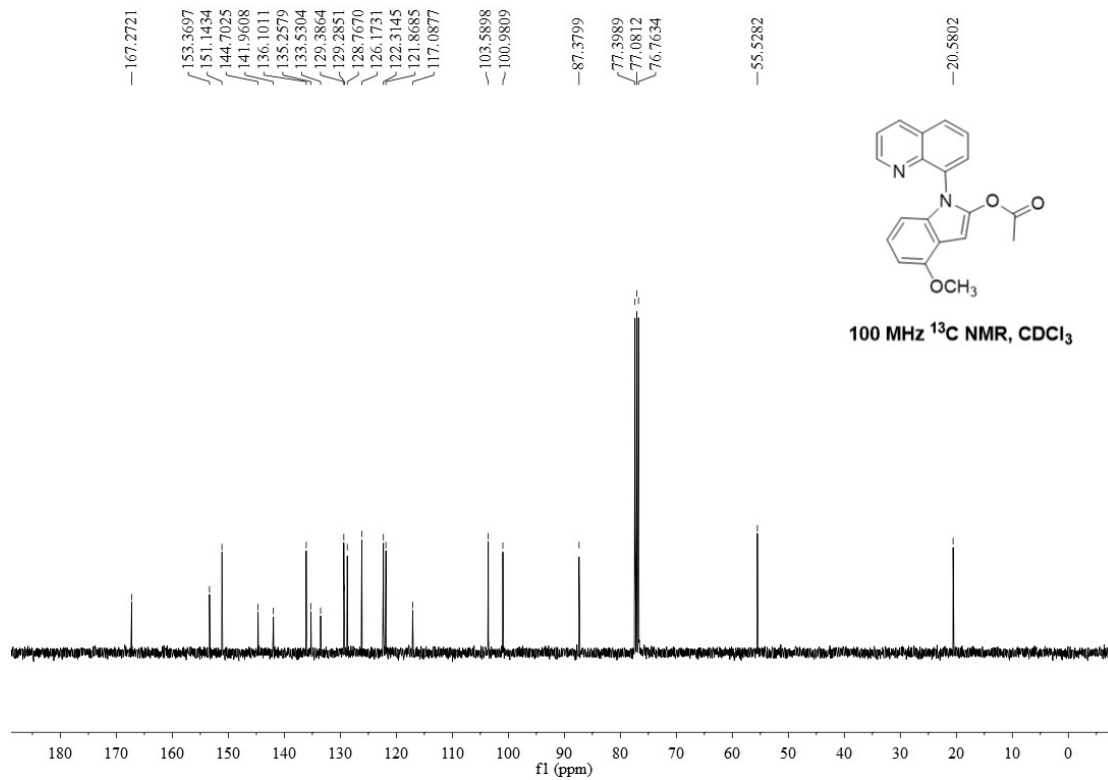

### 4-Methyl-1-(quinolin-8-yl)-1H-indol-2-yl acetate (2da)

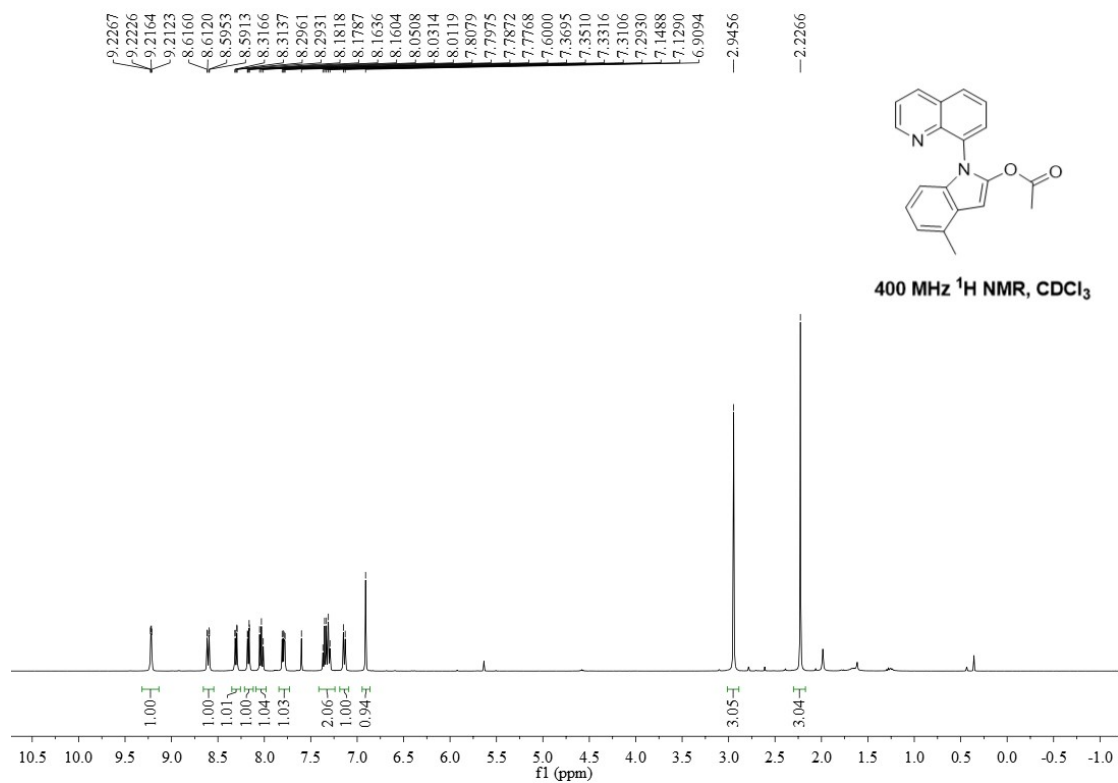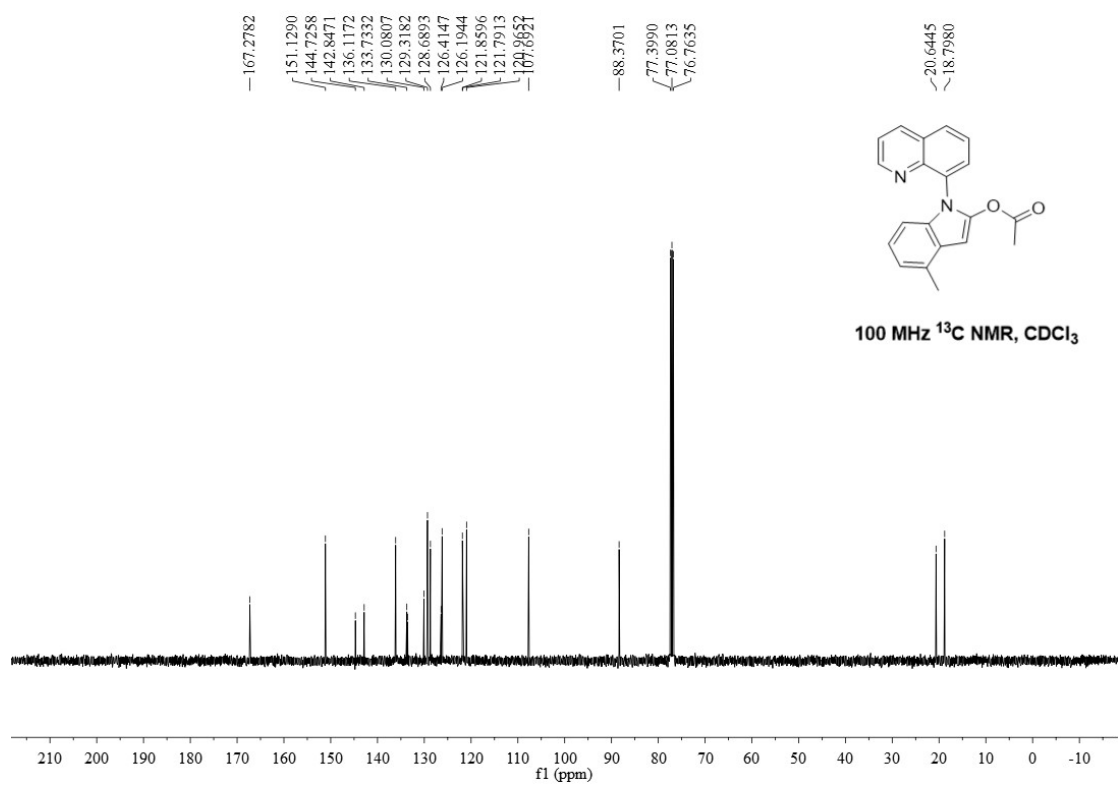



### 4-Fluoro-1-(quinolin-8-yl)-1H-indol-2-yl acetate (2ea)

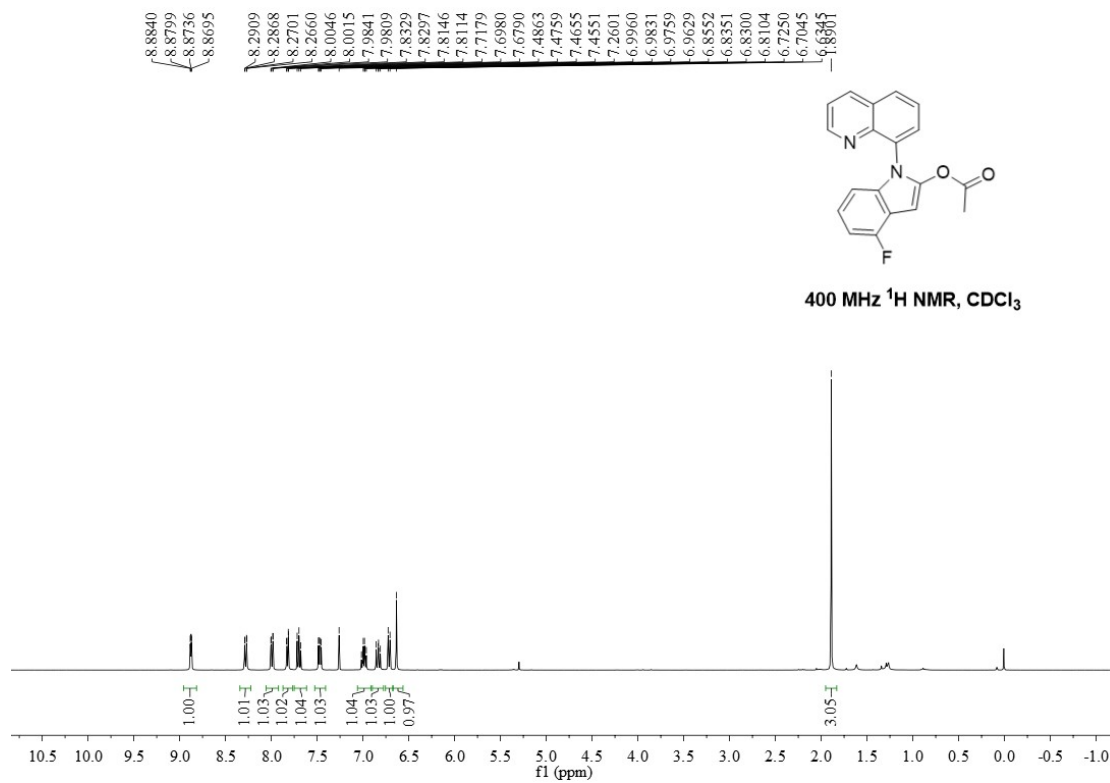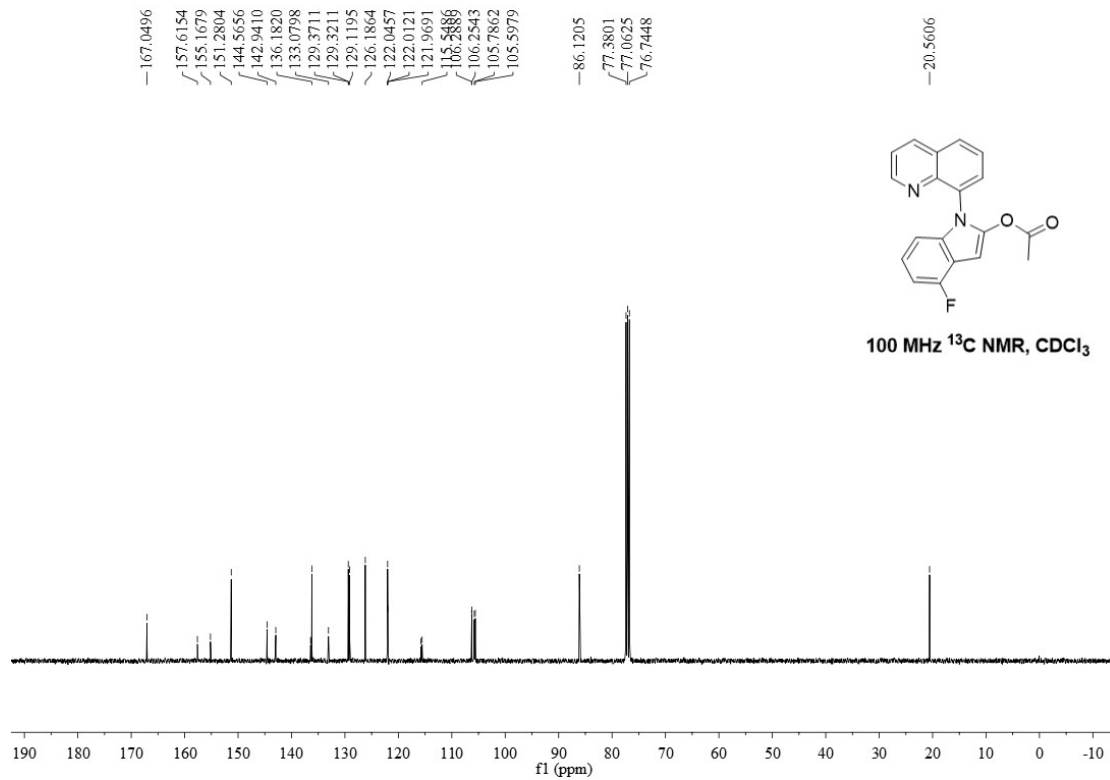

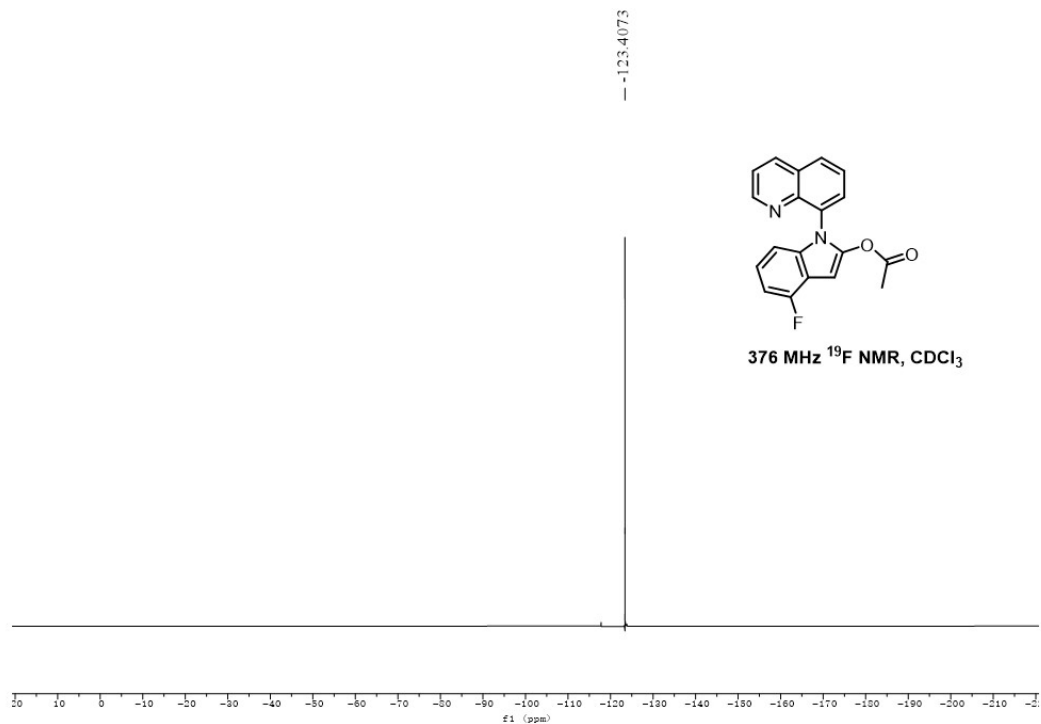

### 4-Chloro-1-(quinolin-8-yl)-1H-indol-2-yl acetate (2fa)

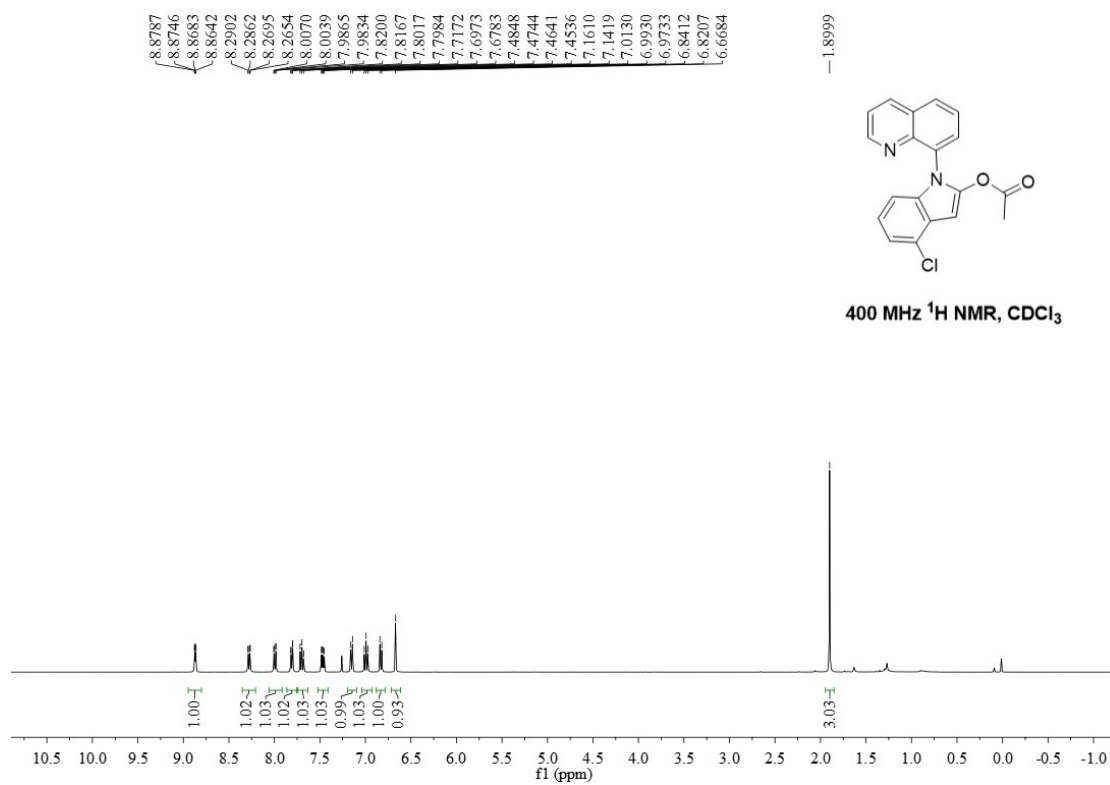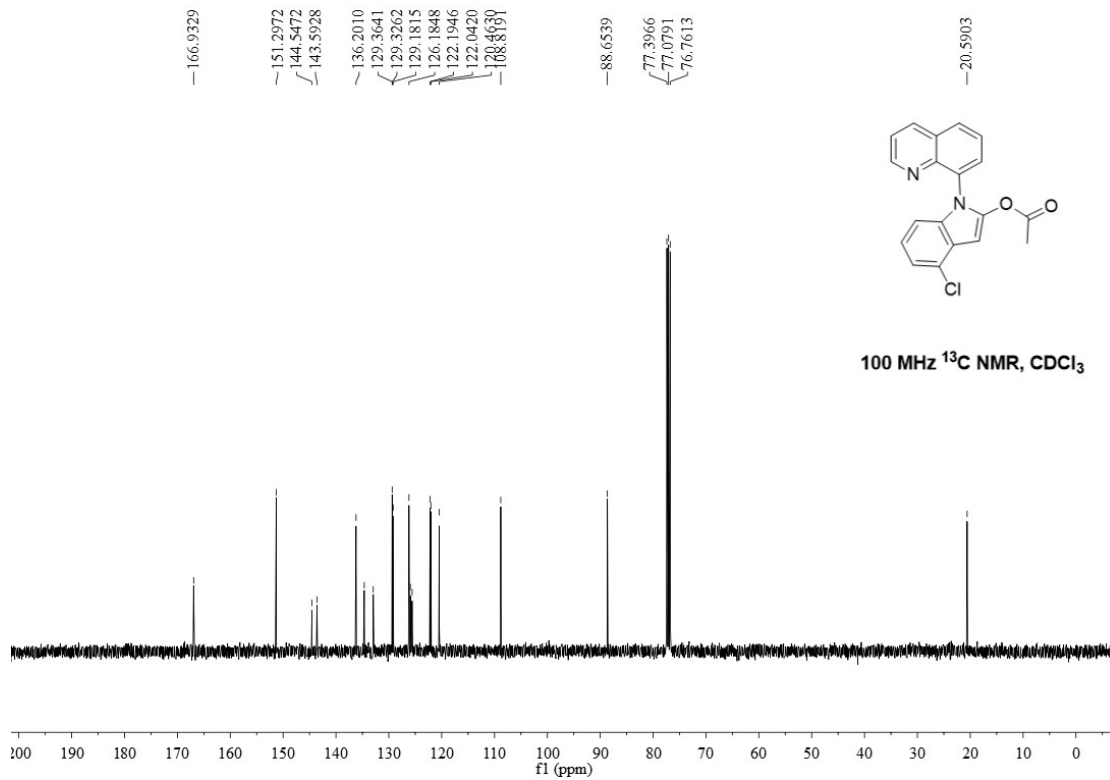

### 4-Bromo-1-(quinolin-8-yl)-1H-indol-2-yl acetate (2ga)

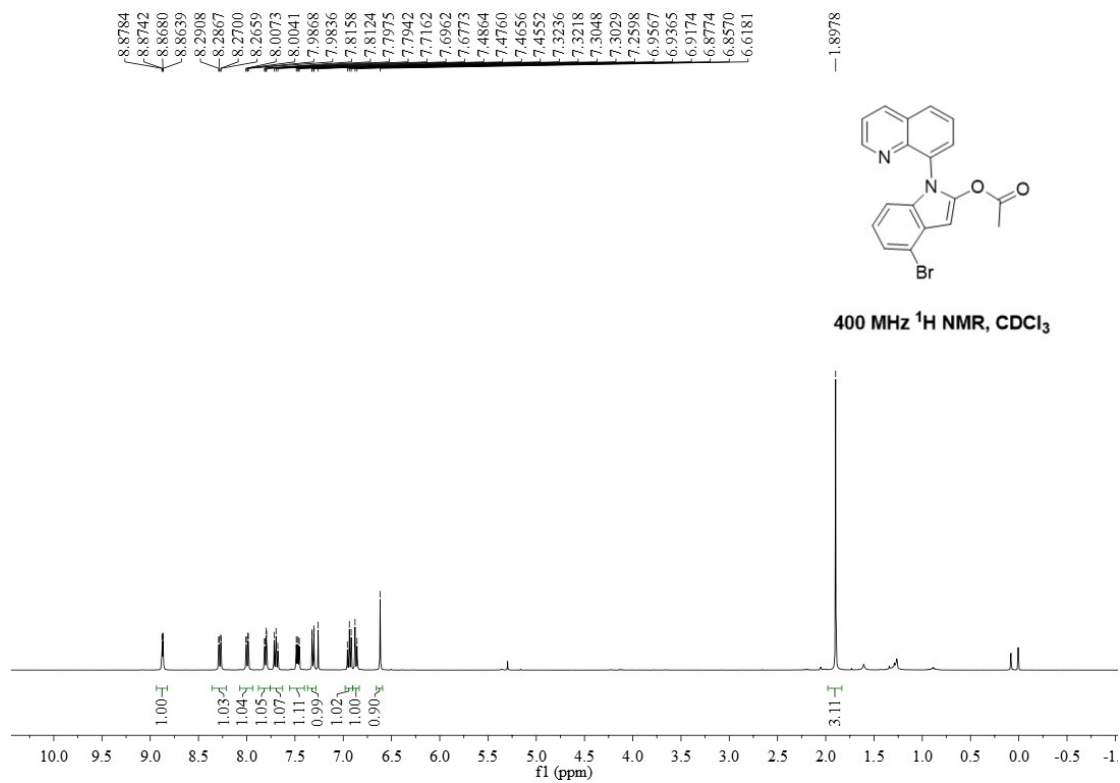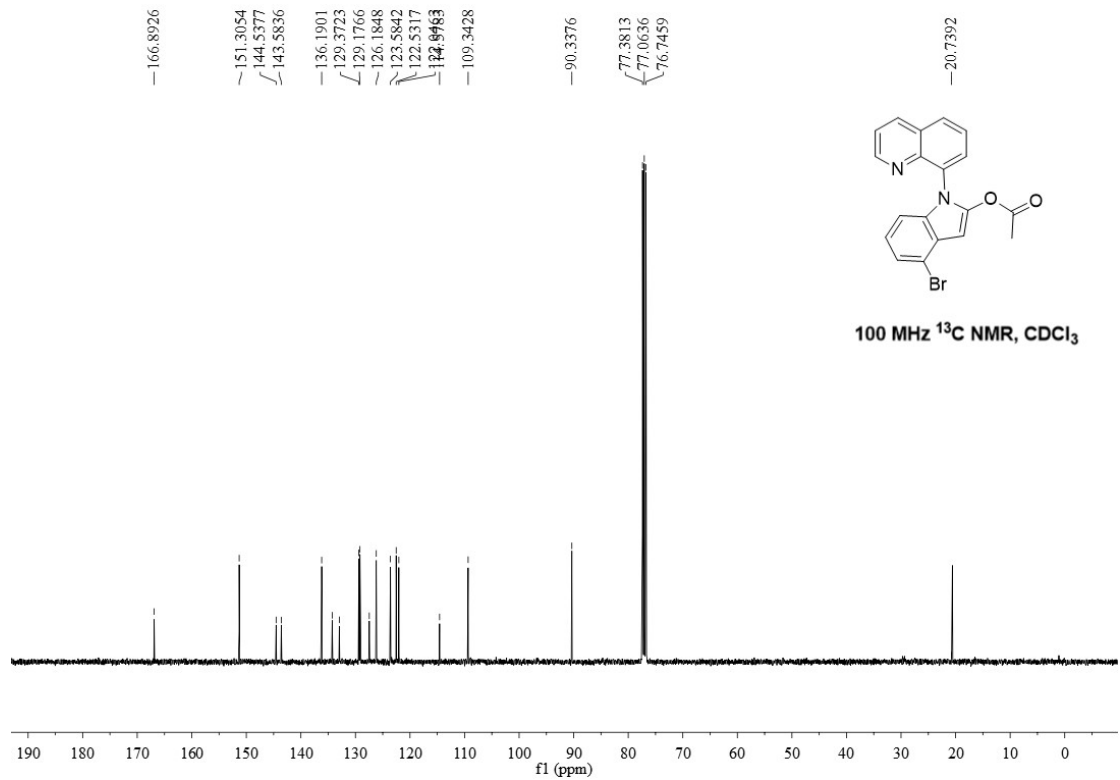

## 5-Methoxy-1-(quinolin-8-yl)-1H-indol-2-yl acetate (2ha)

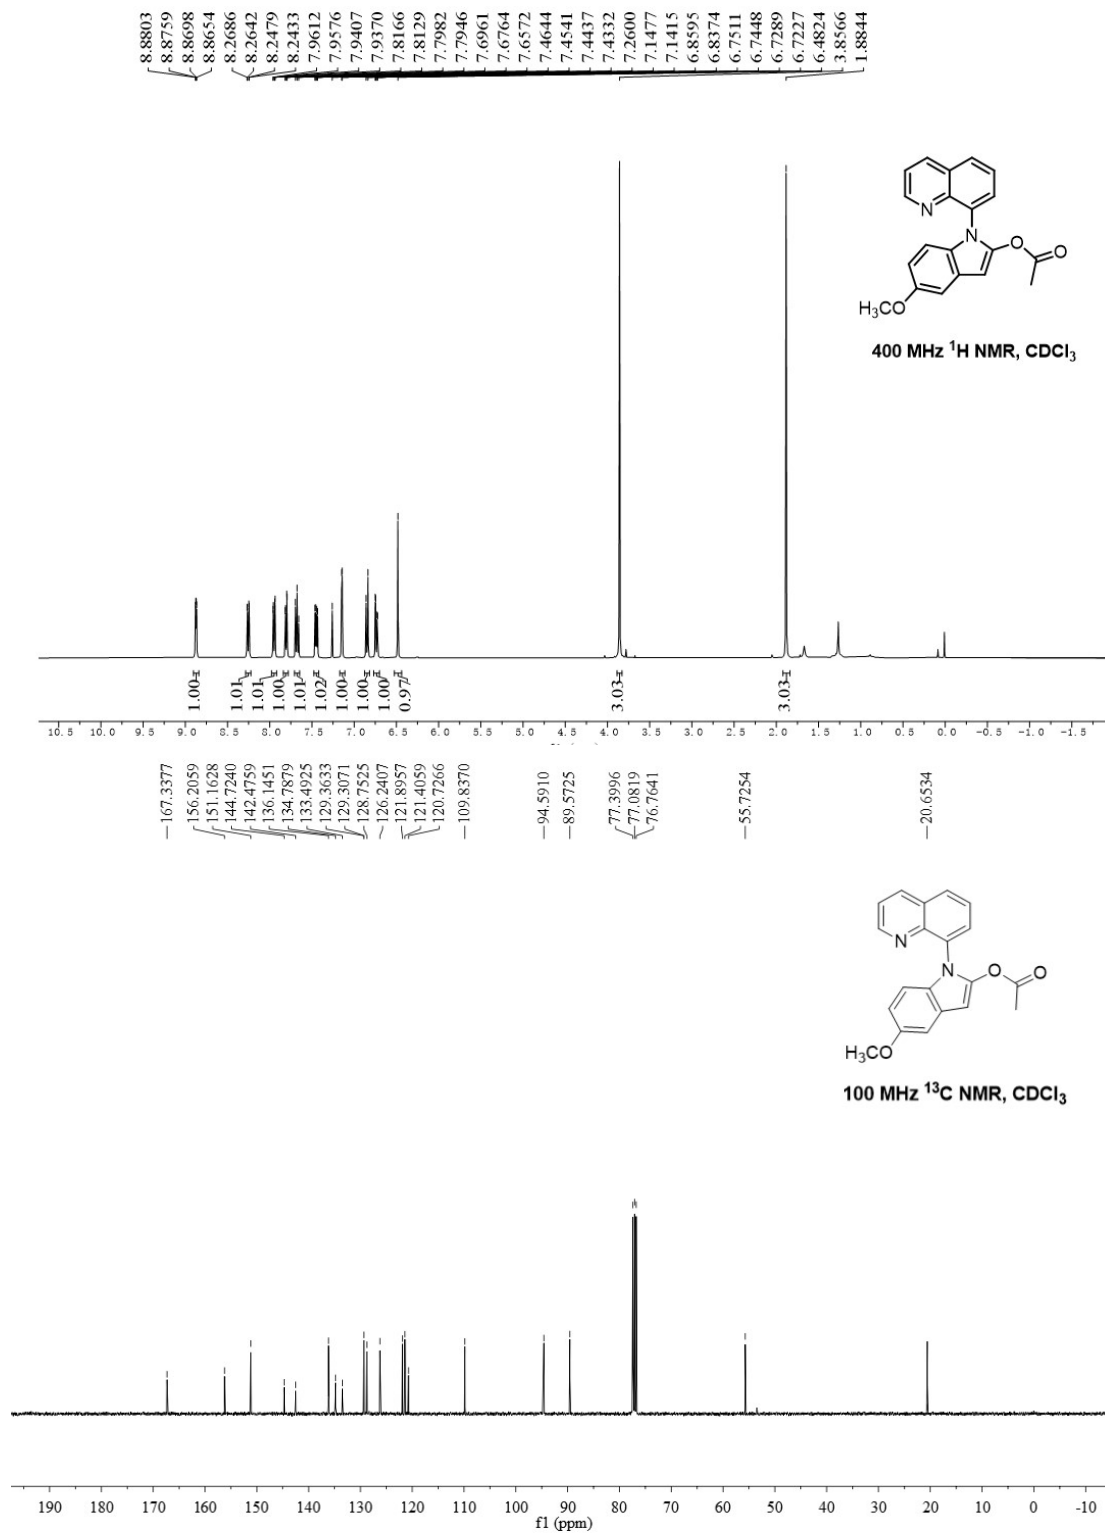

### 5-Fluoro-1-(quinolin-8-yl)-1H-indol-2-yl acetate (2ia)

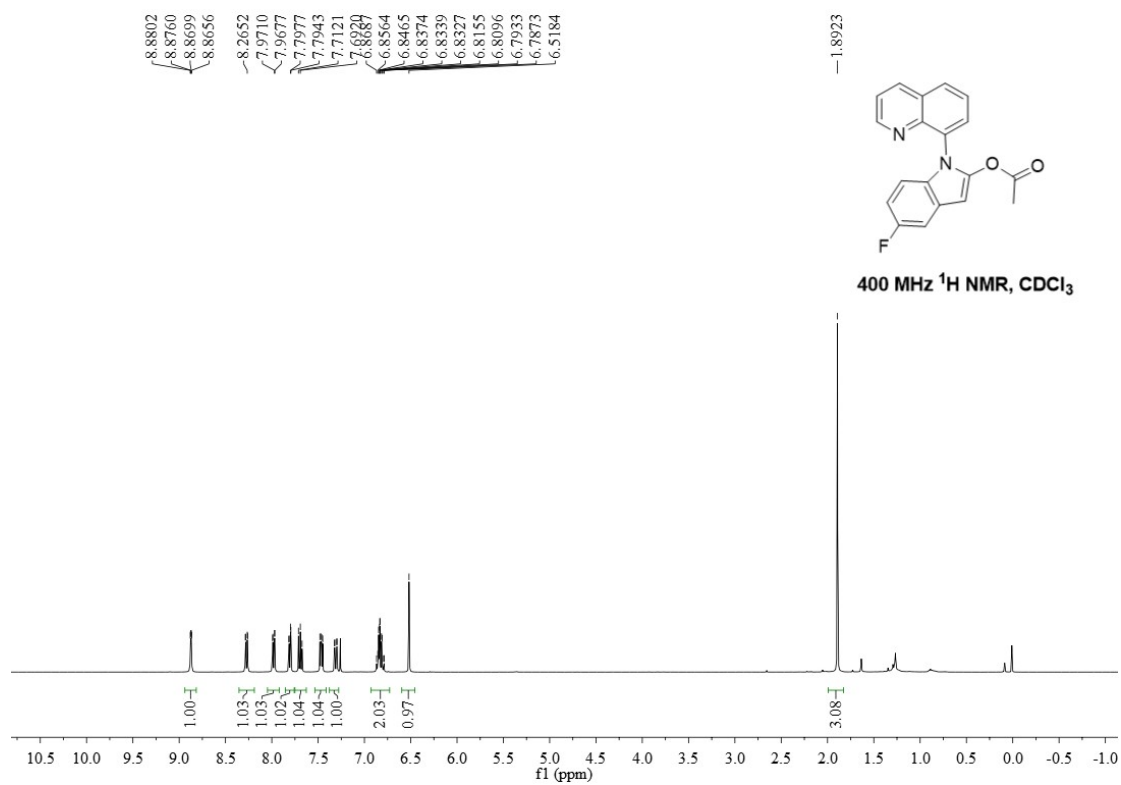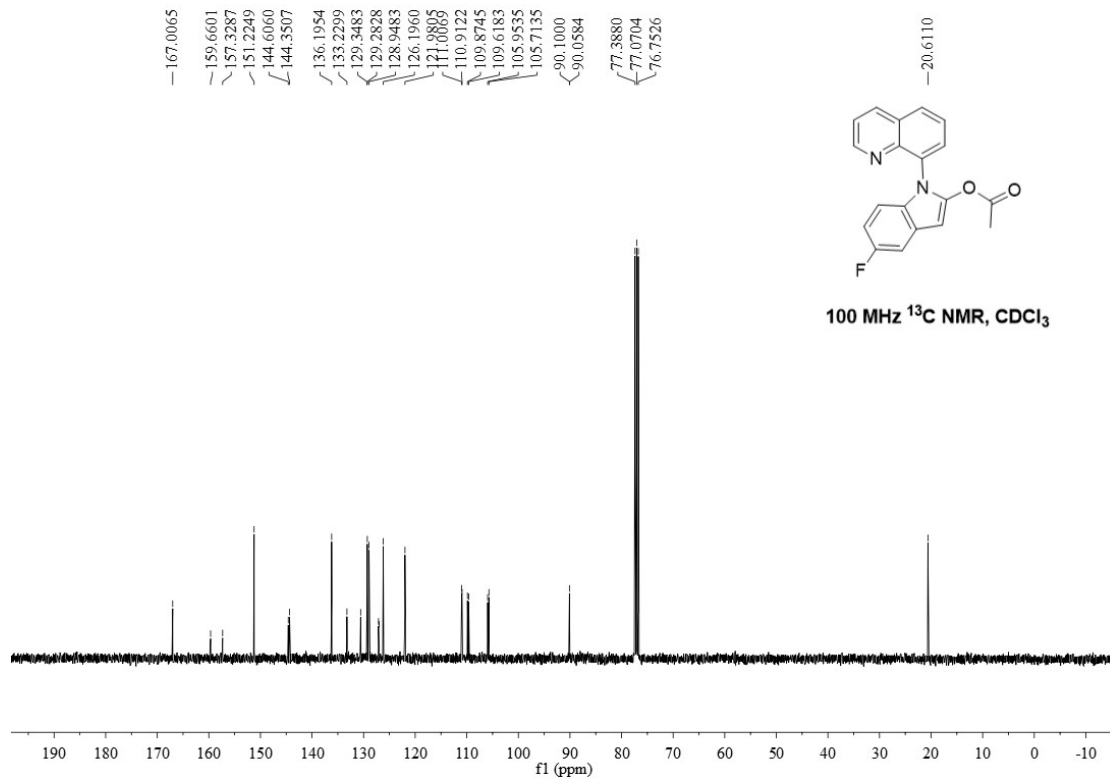

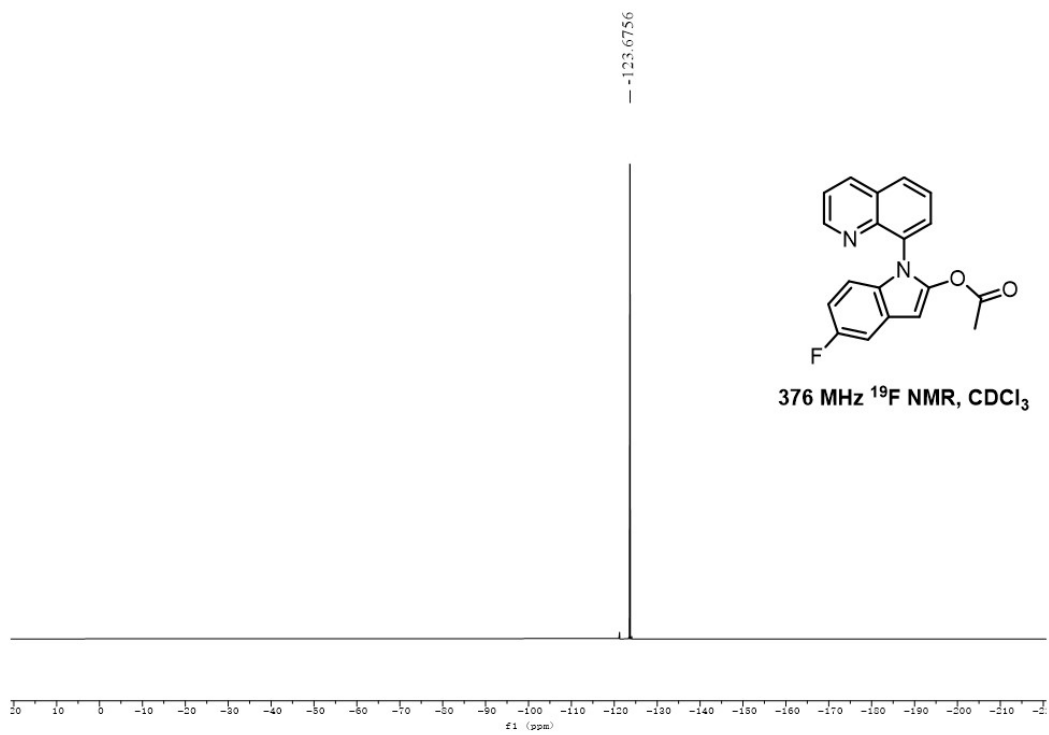

## 5-Chloro-1-(quinolin-8-yl)-1H-indol-2-yl acetate (2ja)

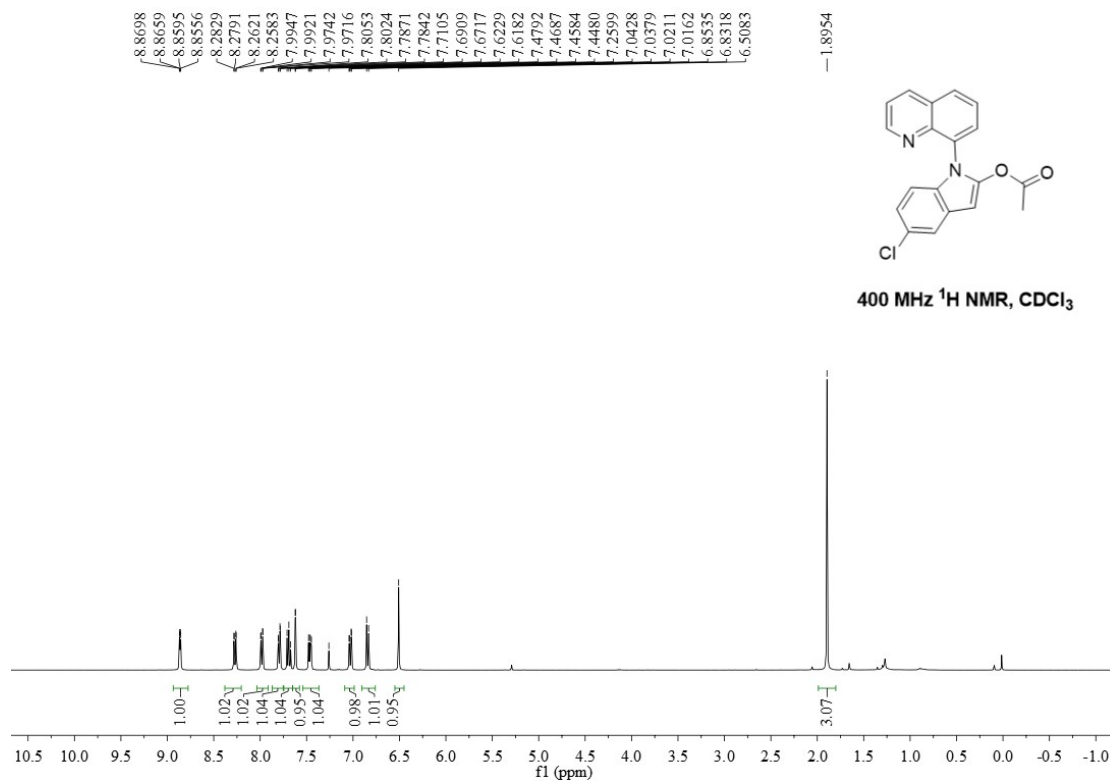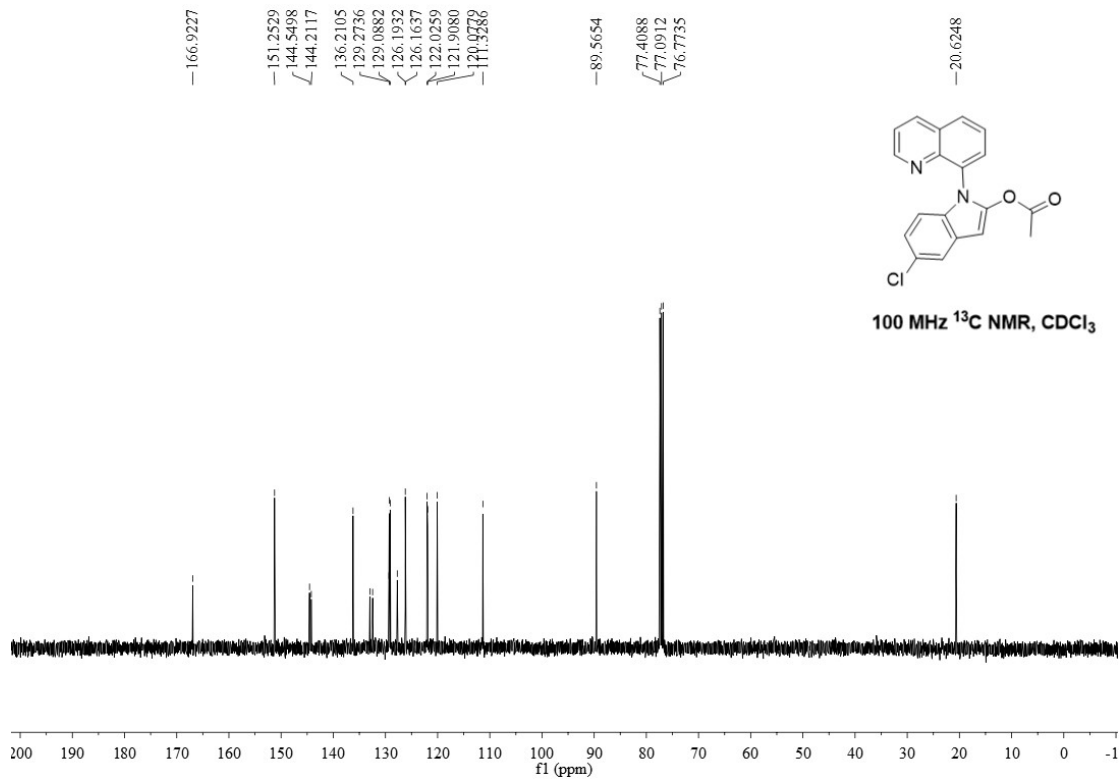



## 5-Bromo-1-(quinolin-8-yl)-1H-indol-2-yl acetate (2ka)

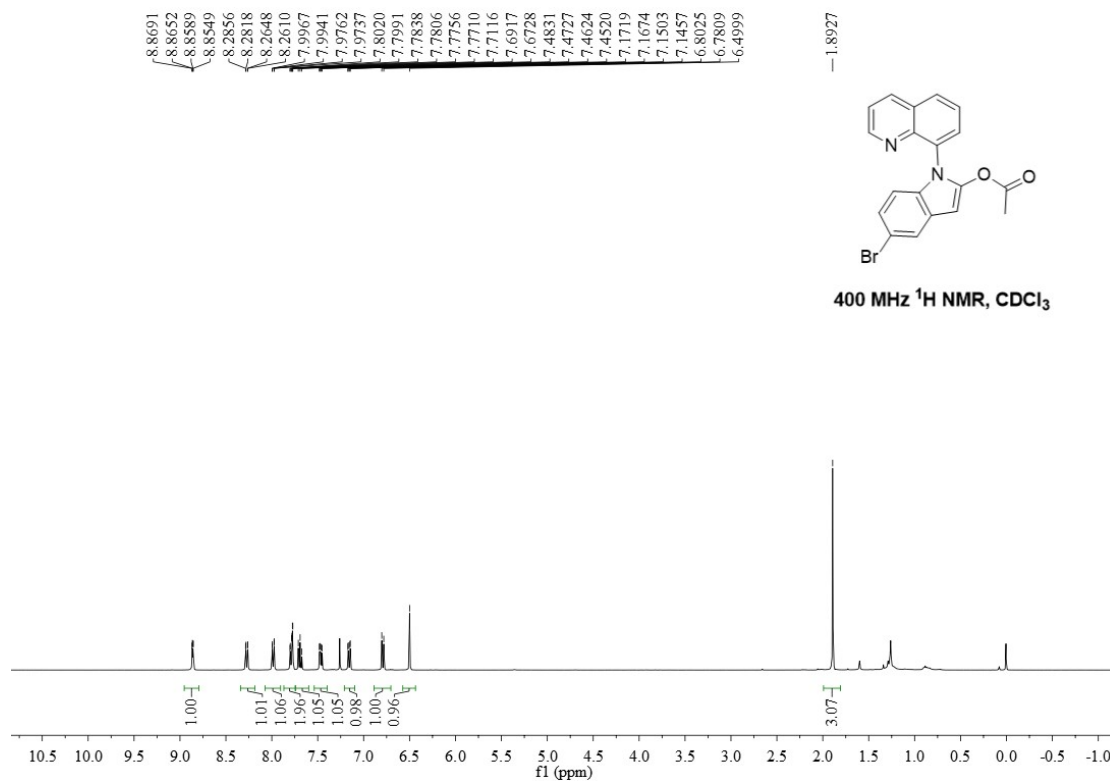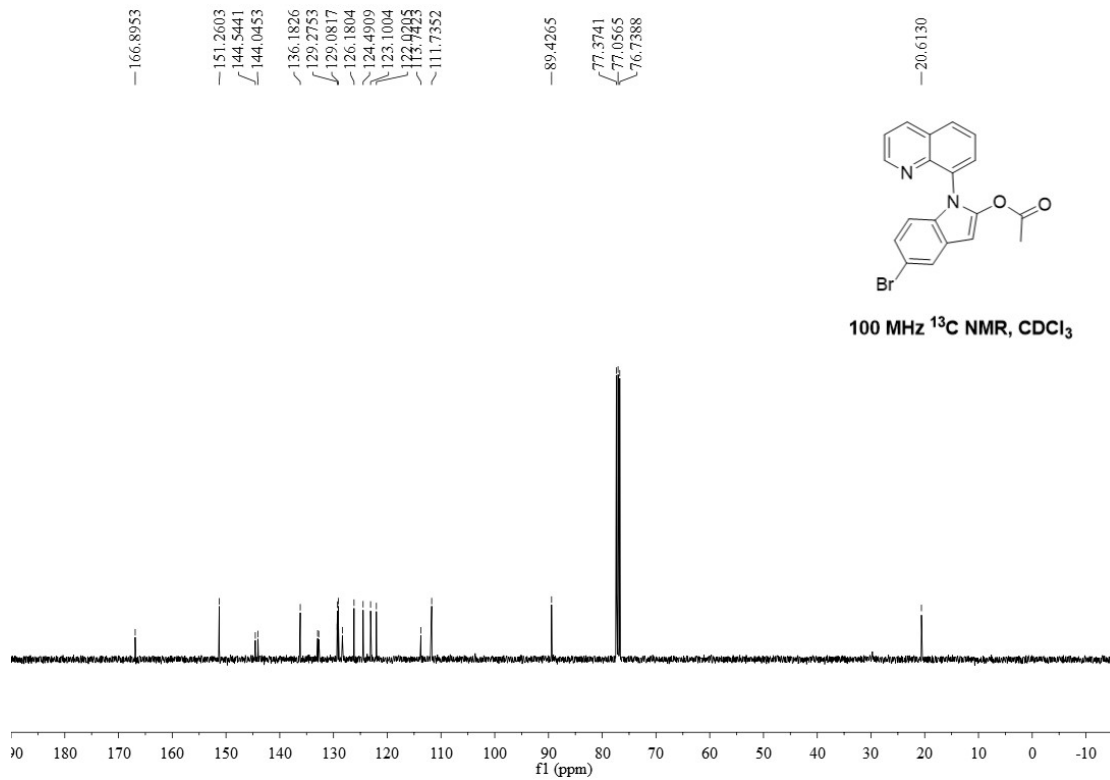

**Methyl 2-acetoxy-1-(quinolin-8-yl)-1H-indole-5-carboxylate (2la)**

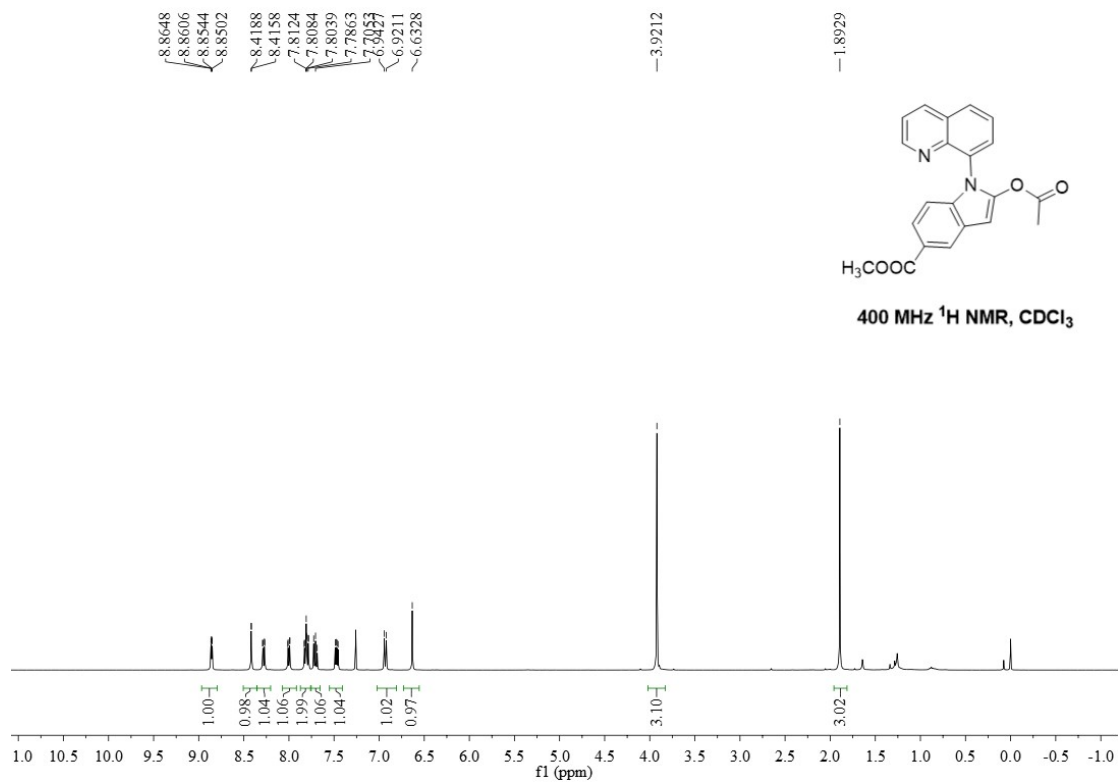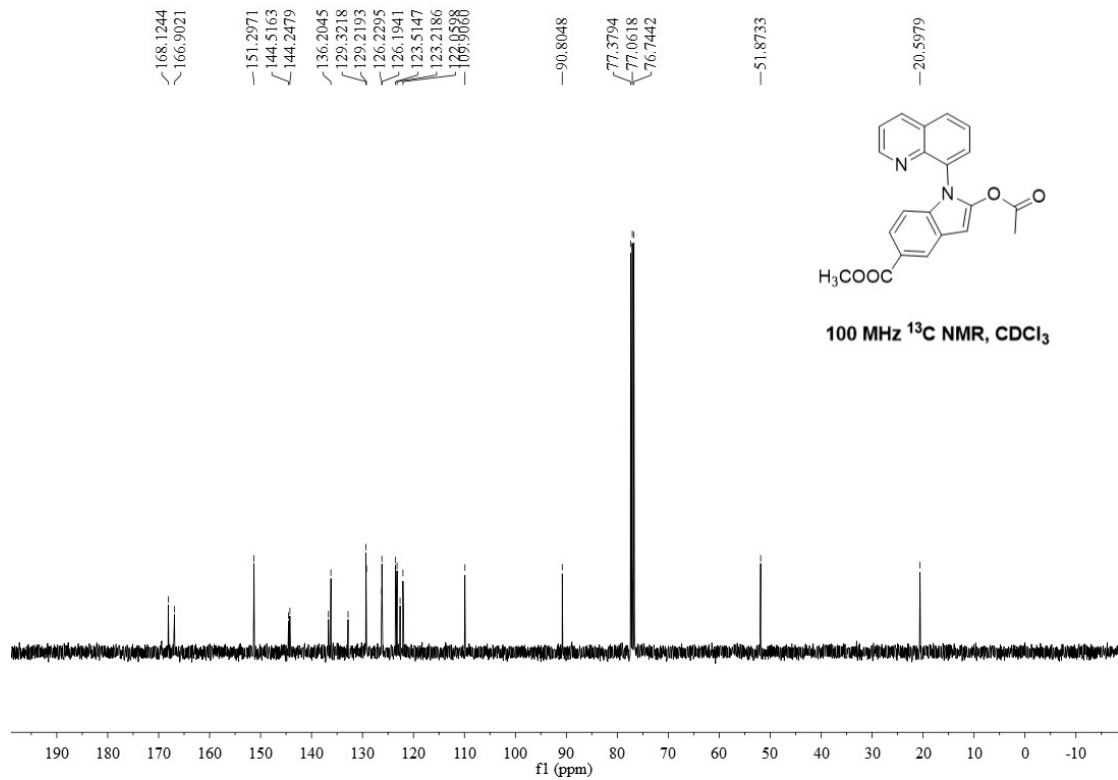

# 6-Fluoro-1-(quinolin-8-yl)-1H-indol-2-yl acetate (2ma)

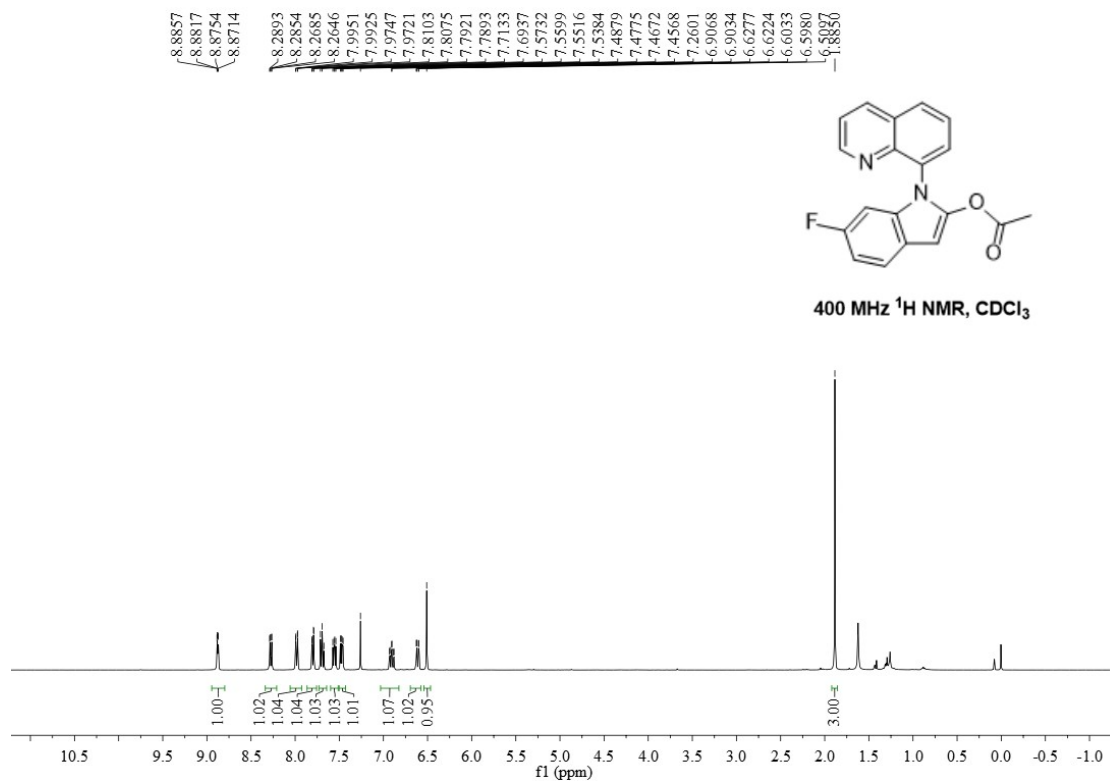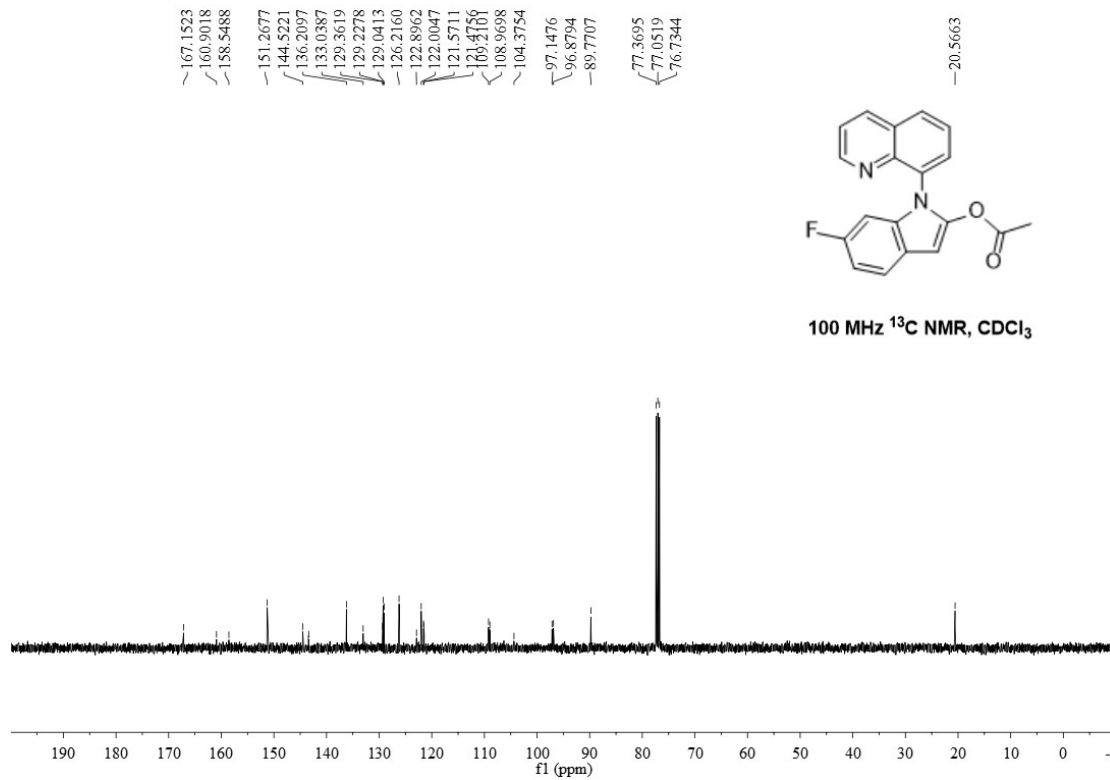

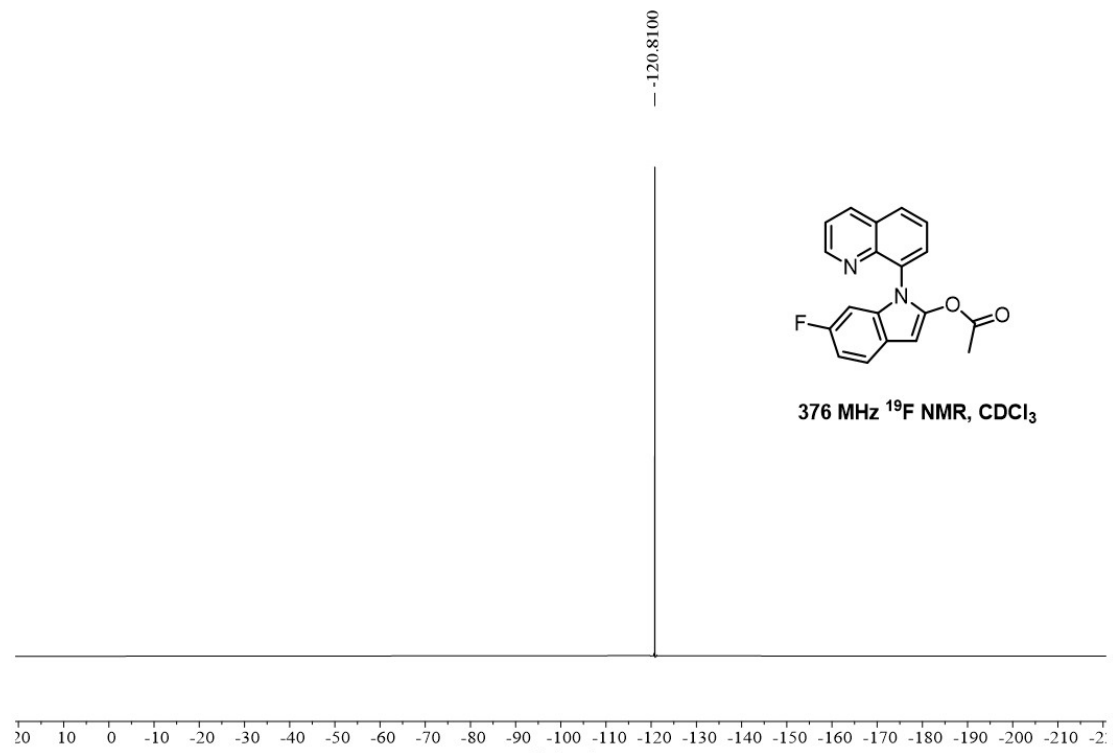

### 6-Chloro-1-(quinolin-8-yl)-1H-indol-2-yl acetate (2na)

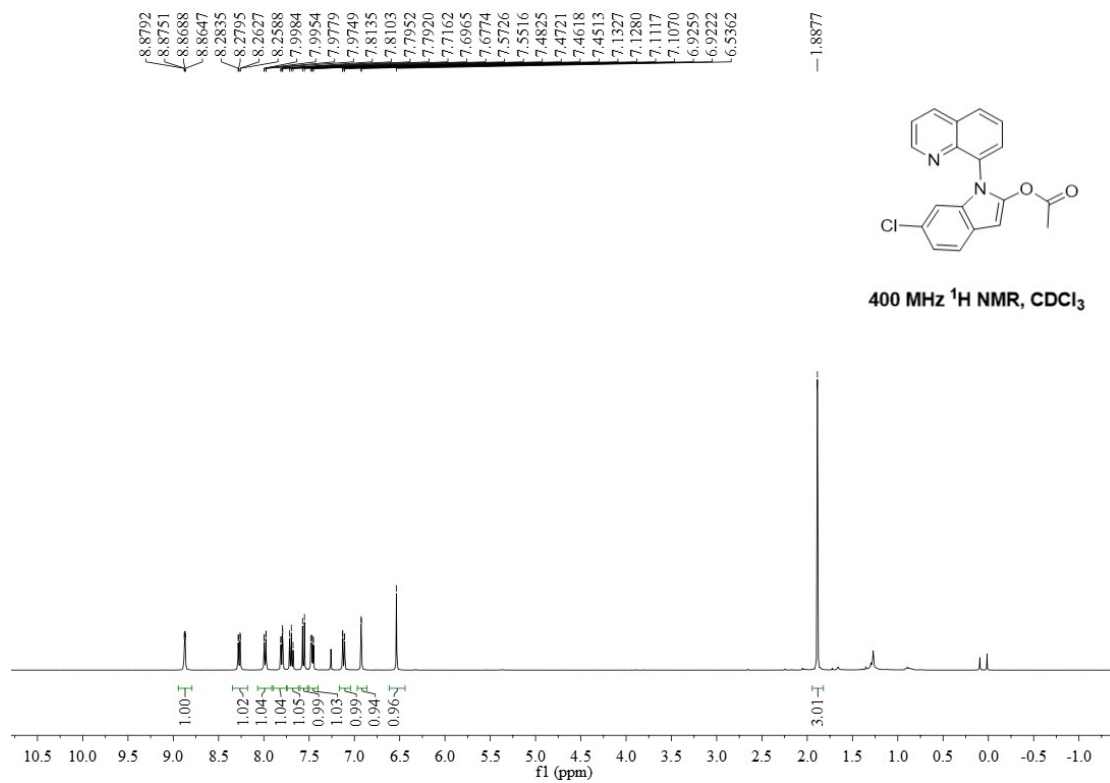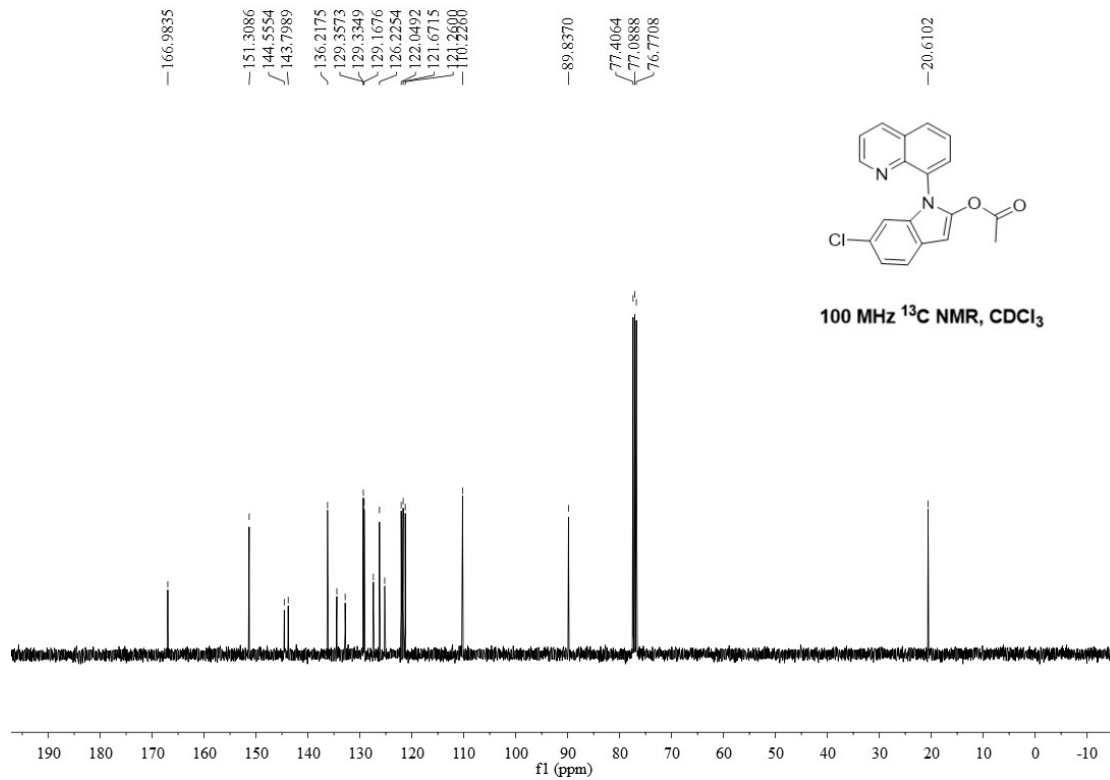

# 6-Bromo-1-(quinolin-8-yl)-1H-indol-2-yl acetate (20a)

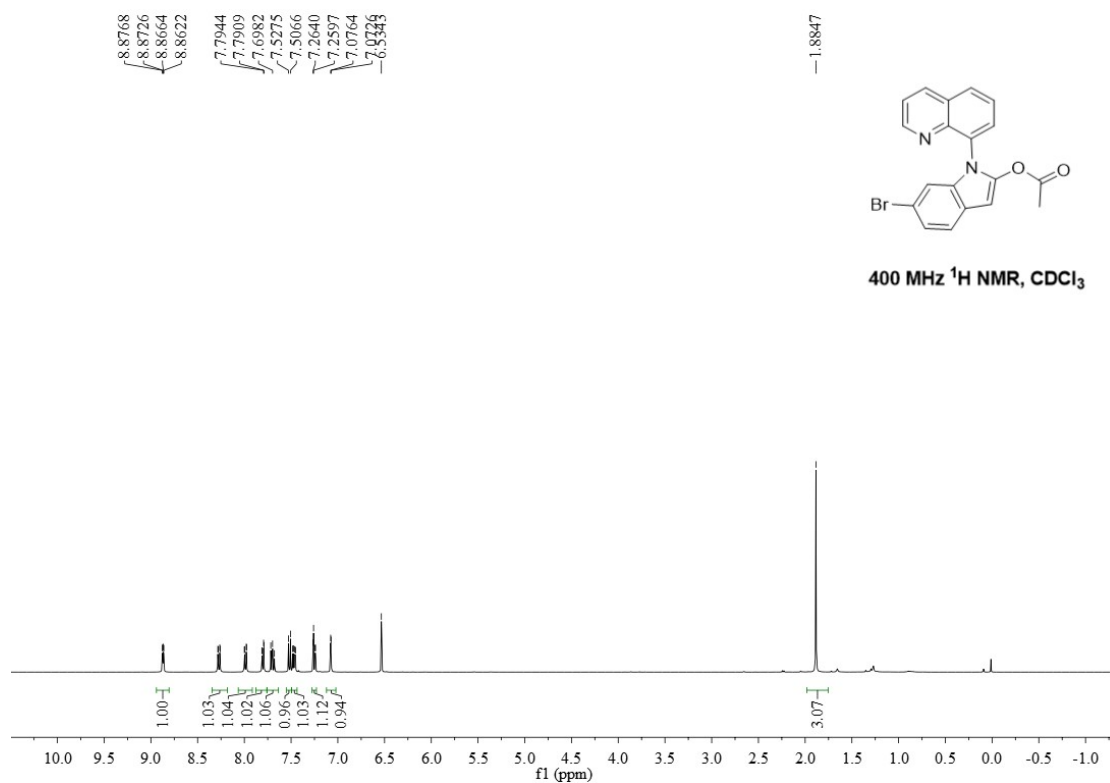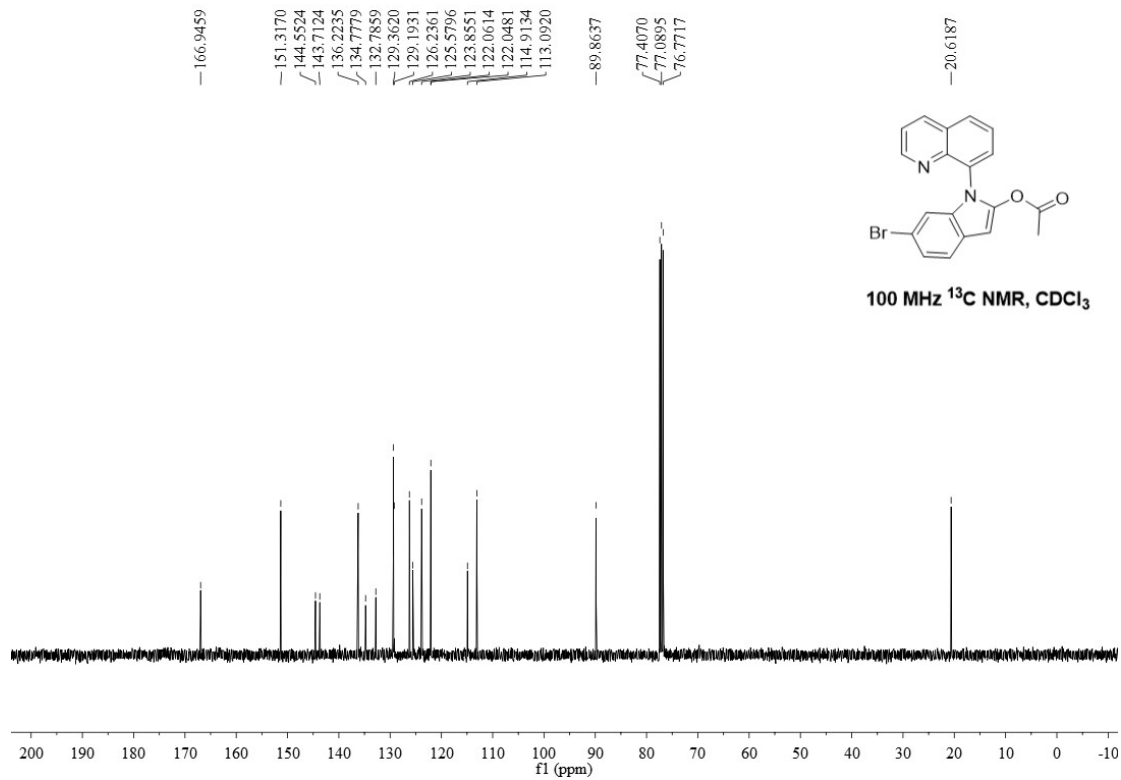

### 3-Methyl-1-(quinolin-8-yl)-1H-indol-2-yl propionate (2bb)

8.9042  
8.8999  
8.8938  
8.8895  
8.2677  
8.2471  
8.2426  
7.9448  
7.9245  
7.9208  
7.7842  
7.7660  
7.7624  
7.6756  
7.6562  
7.6364  
7.4676  
7.4572  
7.4469  
7.4365  
7.1703  
7.0993  
6.9465  
6.9362  
2.2930  
2.1878  
2.1795  
2.1688  
2.1606  
2.1497  
2.1418  
2.1308  
2.1230  
0.8608  
0.8418  
0.8229

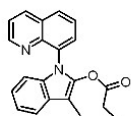

400 MHz <sup>1</sup>H NMR, CDCl<sub>3</sub>

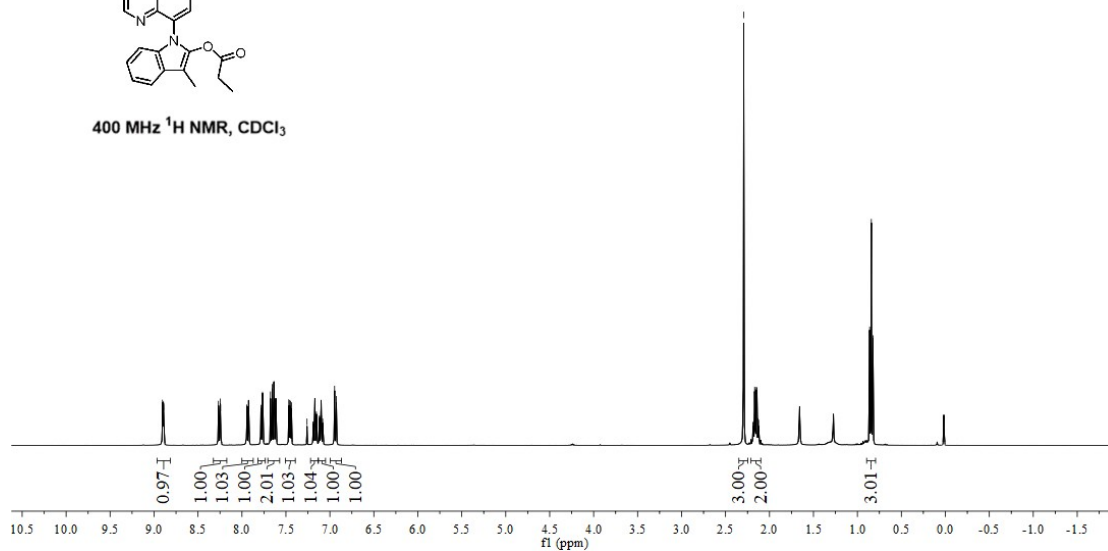

-171.3893  
151.1149  
136.1511  
134.2352  
133.7223  
129.4813  
129.3028  
128.4408  
127.4600  
126.2467  
121.8264  
121.7398  
119.9963  
118.8429  
110.1251  
98.2720  
77.4057  
77.0880  
76.7701  
-27.1430  
8.8403  
7.9157

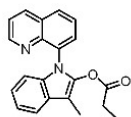

100 MHz <sup>13</sup>C NMR, CDCl<sub>3</sub>

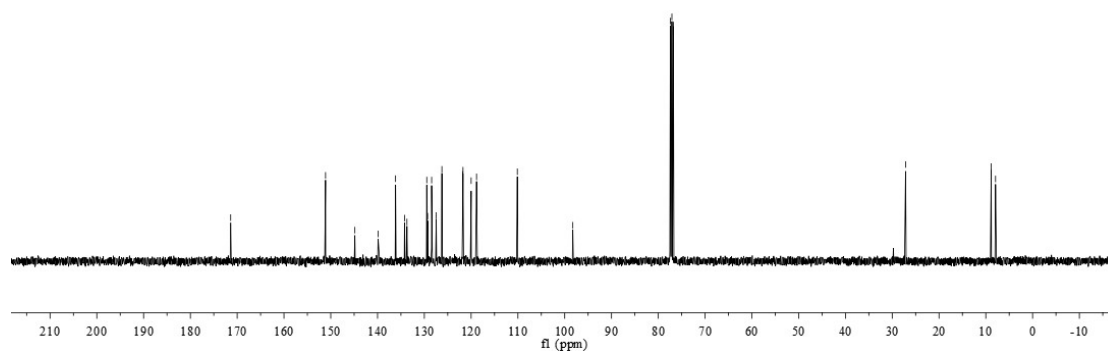

### 3-Methyl-1-(quinolin-8-yl)-1H-indol-2-yl butyrate (2bc)

8.9068  
8.9025  
8.8964  
8.8921  
8.8678  
8.2633  
8.2469  
8.2425  
7.9449  
7.9412  
7.9243  
7.9206  
7.7809  
7.7772  
7.7627  
7.7589  
7.6698  
7.6493  
7.6305  
7.6269  
7.6074  
7.4680  
7.4576  
7.4473  
7.4368  
7.2600  
7.1628  
7.1459  
7.1430  
7.1113  
7.1081  
7.0909  
7.0879  
7.0732  
6.9291  
6.9089  
2.2841  
2.1438  
2.1381  
2.1255  
2.1201  
1.3590  
1.3407  
1.3303  
1.3223  
1.3120  
1.2940  
0.6545  
0.6361  
0.6174

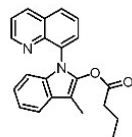

400 MHz  $^1\text{H}$  NMR,  $\text{CDCl}_3$

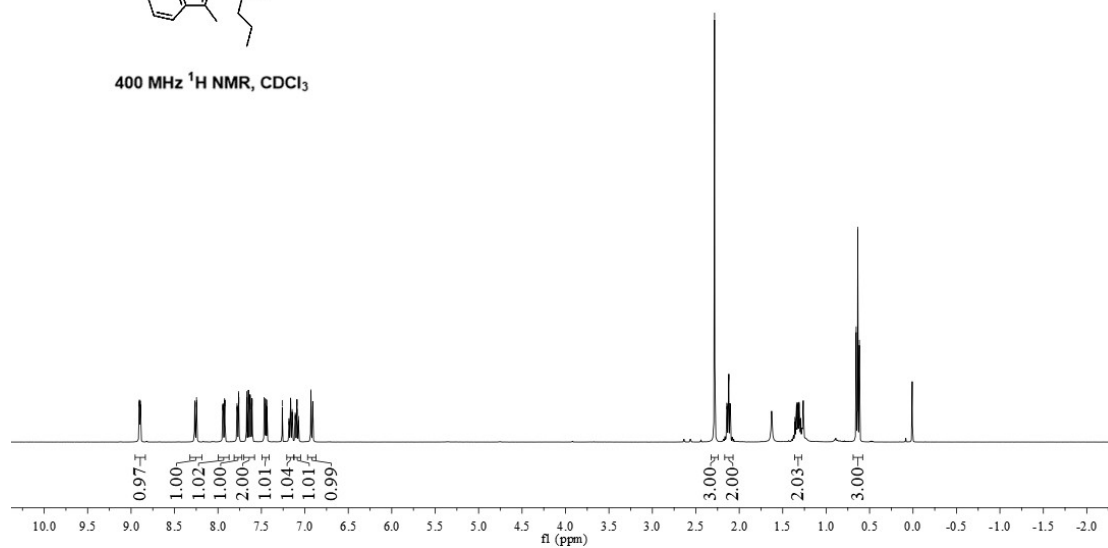

170.5814  
151.1657  
136.1075  
134.2787  
133.7227  
129.5983  
129.3190  
128.4710  
127.4173  
126.2456  
121.8100  
121.7181  
119.9700  
118.8430  
110.1123  
98.2250  
77.3874  
77.0714  
76.7531  
35.4924  
18.1099  
13.2406  
7.8943

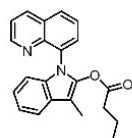

100 MHz  $^{13}\text{C}$  NMR,  $\text{CDCl}_3$

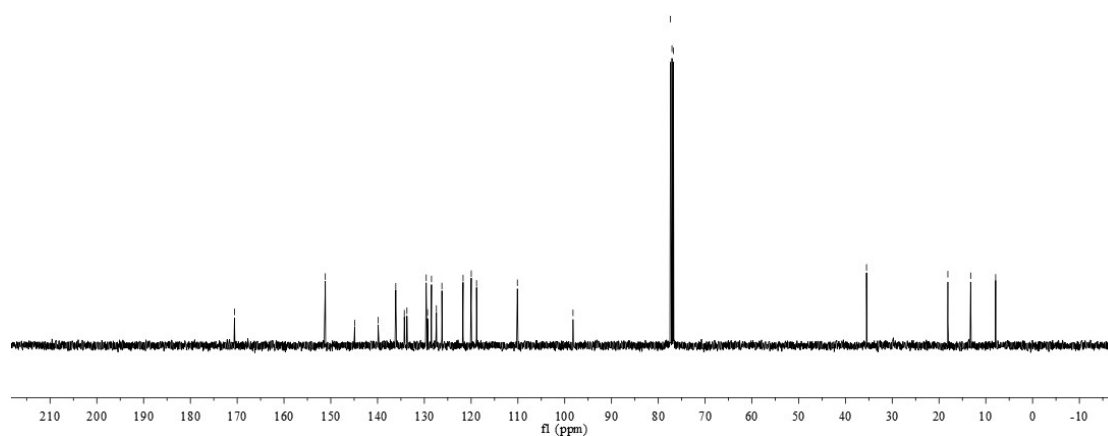



### 3-Methyl-1-(quinolin-8-yl)-1H-indol-2-yl isobutyrate (2bd)

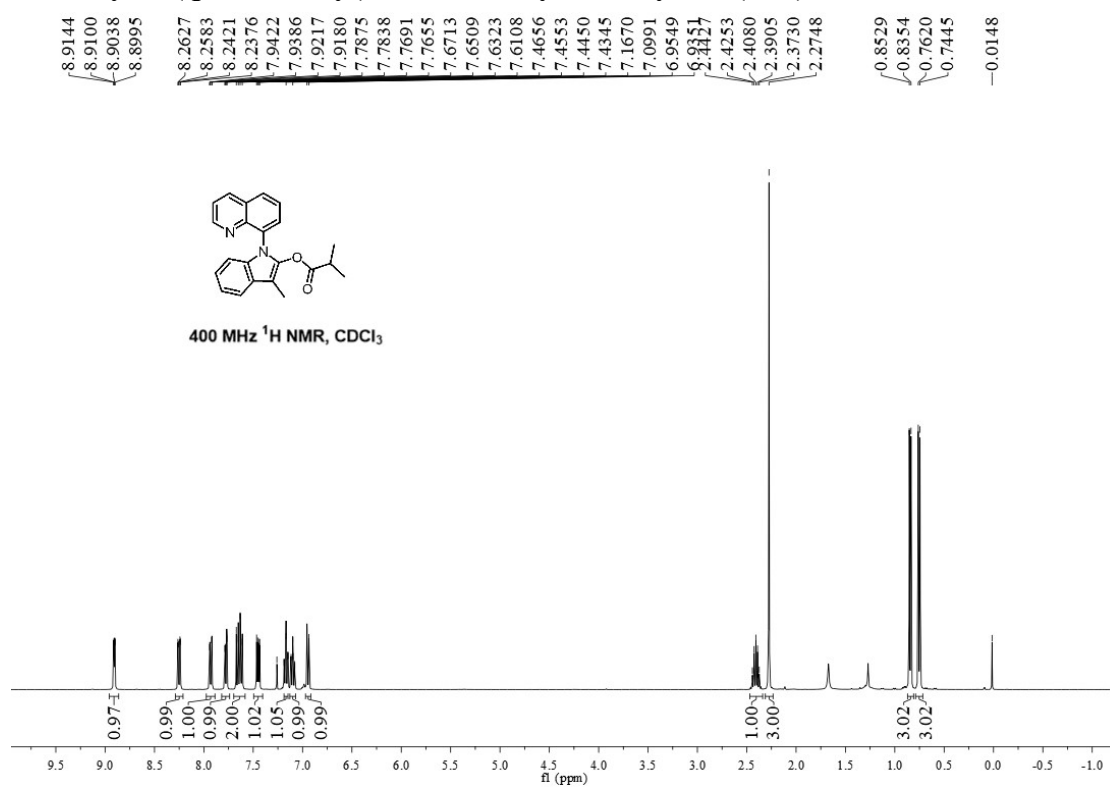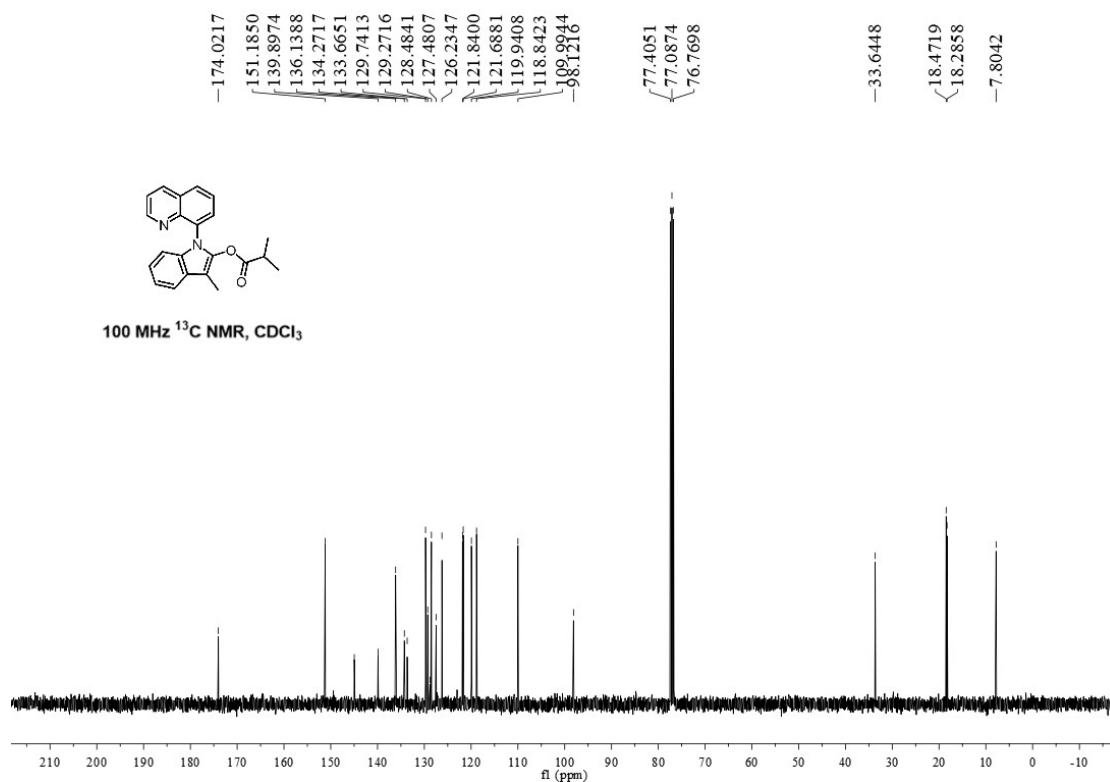

### 3-Methyl-1-(quinolin-8-yl)-1H-indol-2-yl pivalate (2be)

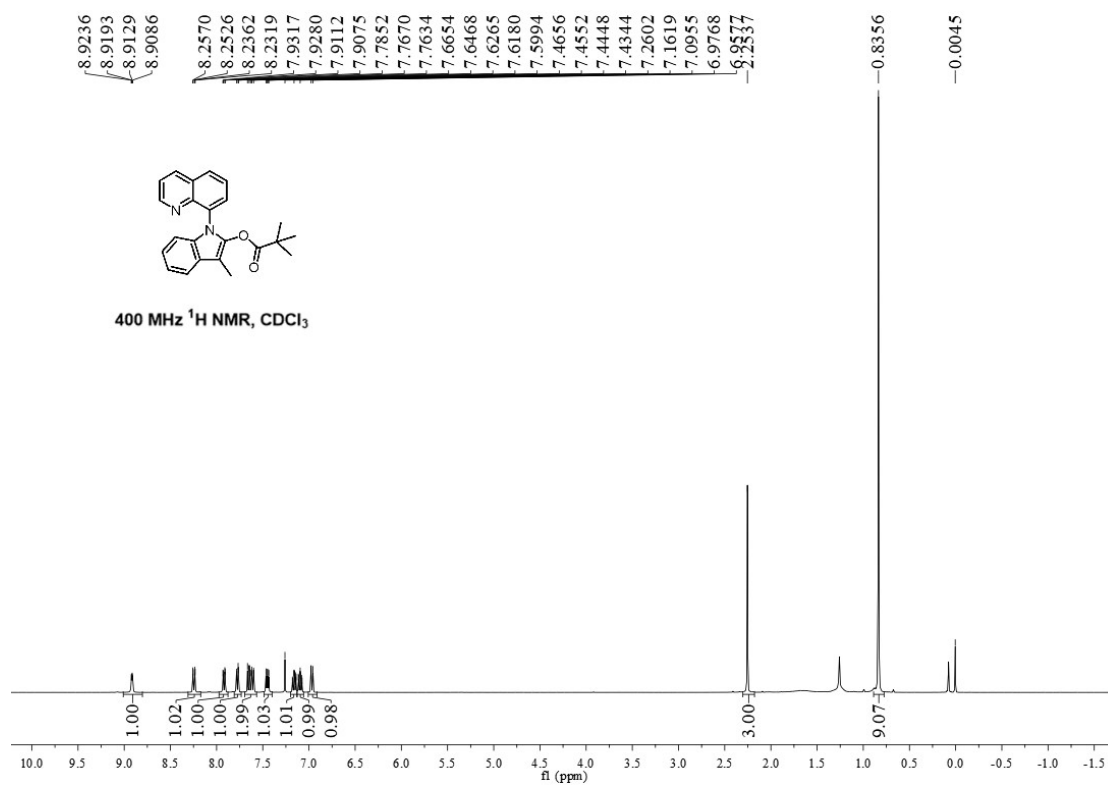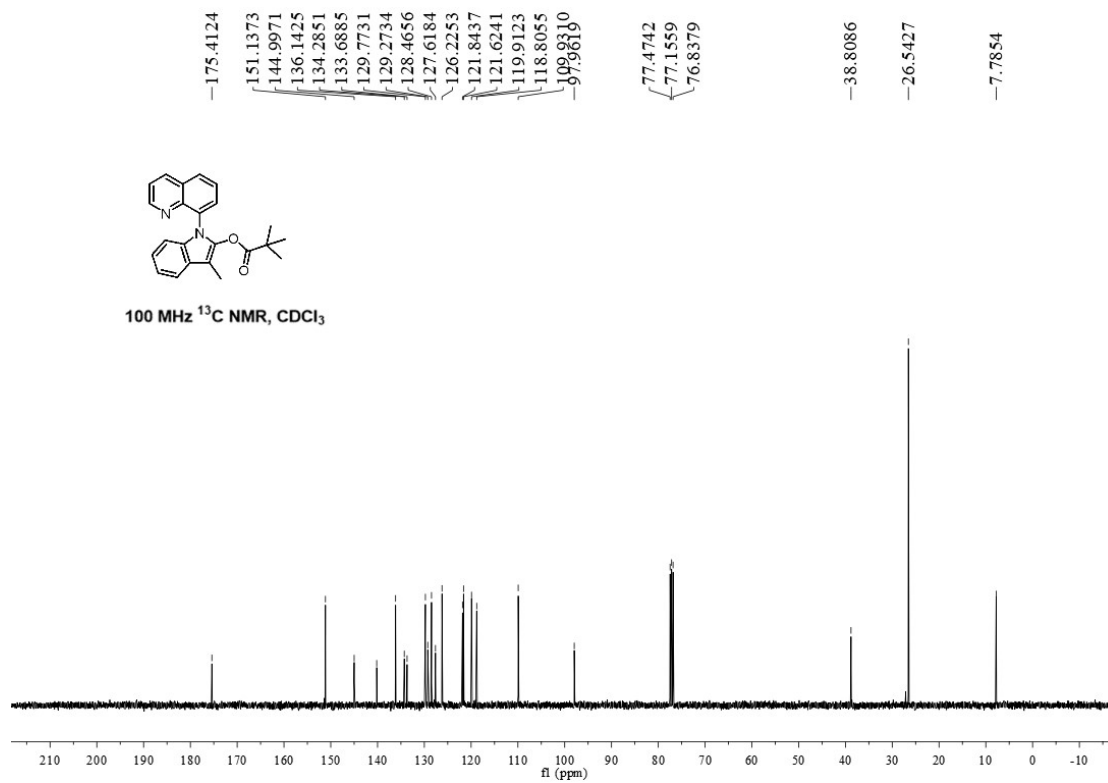

### 3-Methyl-1-(quinolin-8-yl)-1H-indol-2-yl benzoate (2bf)

8.8756  
8.8713  
8.8650  
8.8607  
8.1842  
8.1798  
8.1633  
8.1590  
7.8672  
7.8636  
7.8549  
7.8513  
7.8469  
7.8433  
7.8363  
7.8327  
7.7574  
7.7542  
7.7367  
7.7330  
7.6780  
7.6753  
7.6562  
7.6537  
7.6284  
7.6091  
7.5895  
7.4788  
7.4603  
7.3796  
7.3691  
7.3588  
7.3484  
7.2992  
7.2783  
7.2636  
7.2598  
7.2052  
7.2027  
7.1859  
7.1829  
7.1539  
7.1367  
7.1338  
7.0302  
7.0276  
7.0253  
7.0076  
2.3521  
0.0173

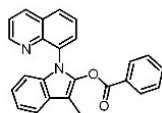

400 MHz  $^1\text{H}$  NMR,  $\text{CDCl}_3$

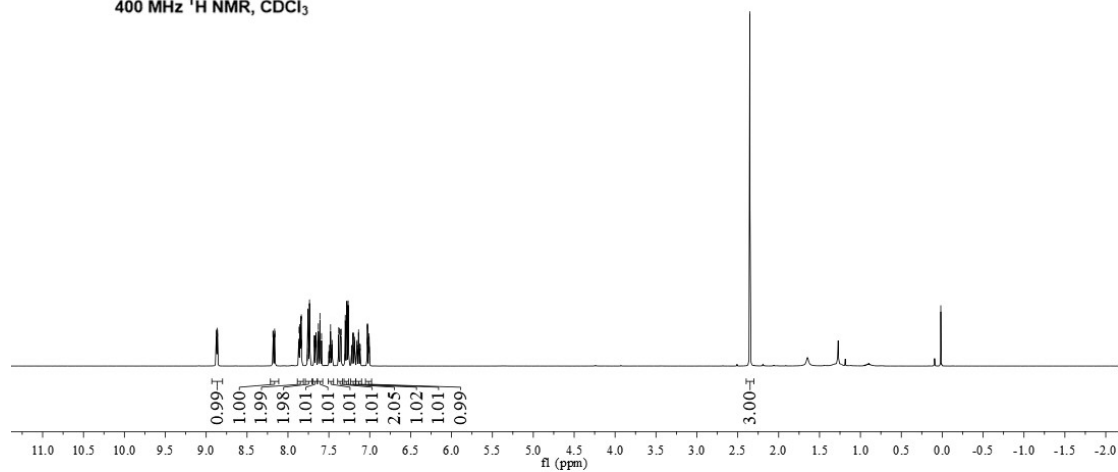

163.5890  
151.0630  
136.0690  
133.5851  
129.9956  
129.2325  
128.3711  
128.2979  
126.2552  
121.8126  
121.6876  
120.0710  
118.9147  
110.1688  
98.7426  
77.3923  
77.0748  
76.7573  
8.0969  
0.0431

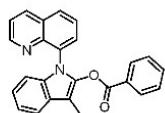

100 MHz  $^{13}\text{C}$  NMR,  $\text{CDCl}_3$

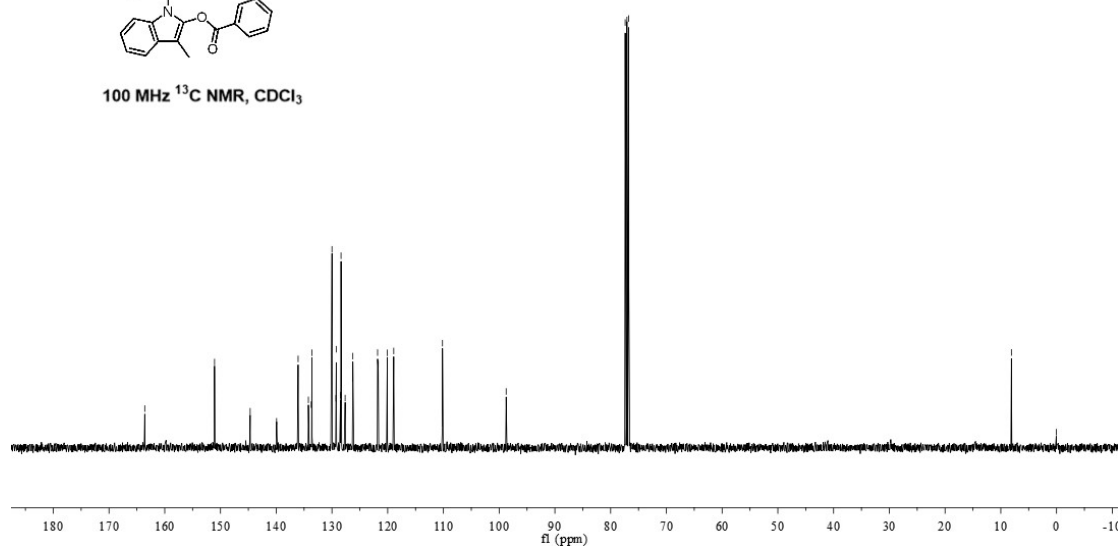

# 1-(Quinolin-8-yl)-1H-indol-2-yl 2-bromobenzoate (2ag)

8.8620  
8.8576  
8.8515  
8.8473  
8.2500  
8.2456  
8.2292  
8.2249  
7.9617  
7.9412  
7.9244  
7.9059  
7.7256  
7.7062  
7.6867  
7.6672  
7.5521  
7.5293  
7.4198  
7.4094  
7.3990  
7.3887  
7.2600  
7.2219  
7.2172  
7.2122  
7.2033  
7.1981  
7.1922  
7.1836  
7.1790  
7.1753  
7.1722  
7.1498  
7.1329  
7.1215  
7.1161  
7.1119  
7.1017  
7.0971  
7.0500  
7.0344  
7.0171  
6.7937

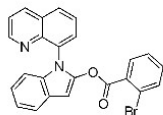

400 MHz  $^1\text{H}$  NMR,  $\text{CDCl}_3$

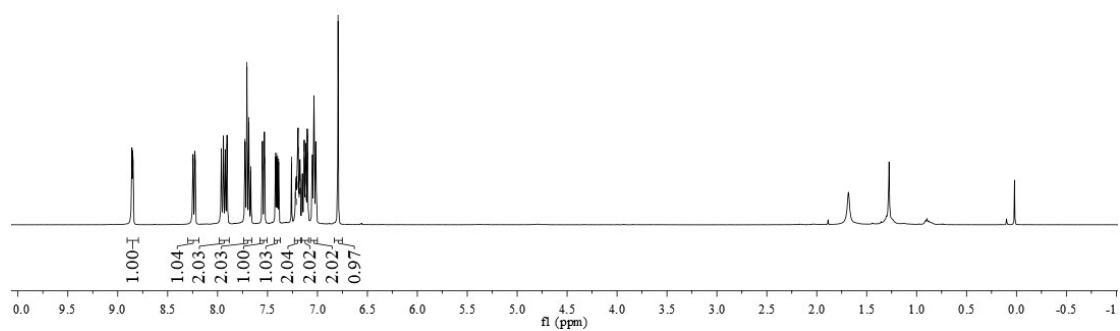

161.5233  
151.2831  
136.1279  
134.6542  
133.2167  
131.5834  
129.6475  
128.8349  
126.9470  
126.2980  
121.8830  
120.9100  
118.6519  
89.9773  
77.4122  
77.0946  
76.7764

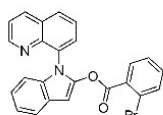

100 MHz  $^{13}\text{C}$  NMR,  $\text{CDCl}_3$

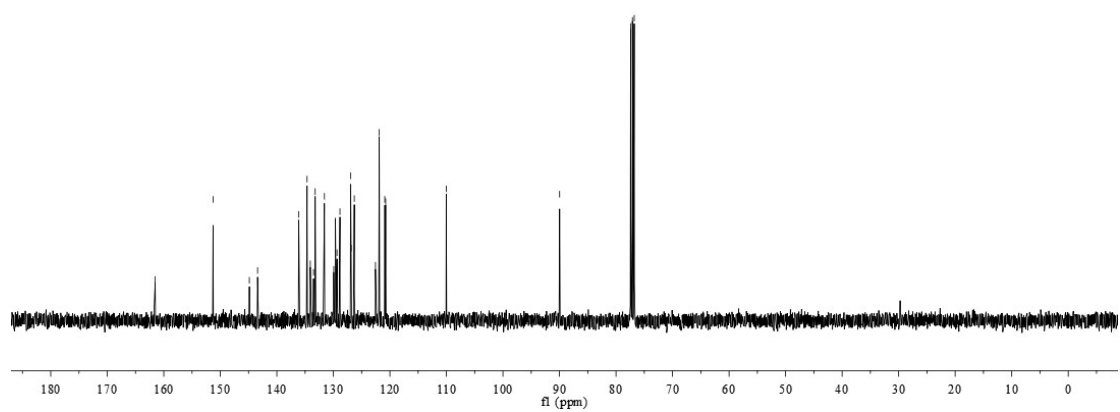

### 3-Methyl-1-(quinolin-8-yl)-1H-indol-2-yl thiophene-2-carboxylate (2bh)

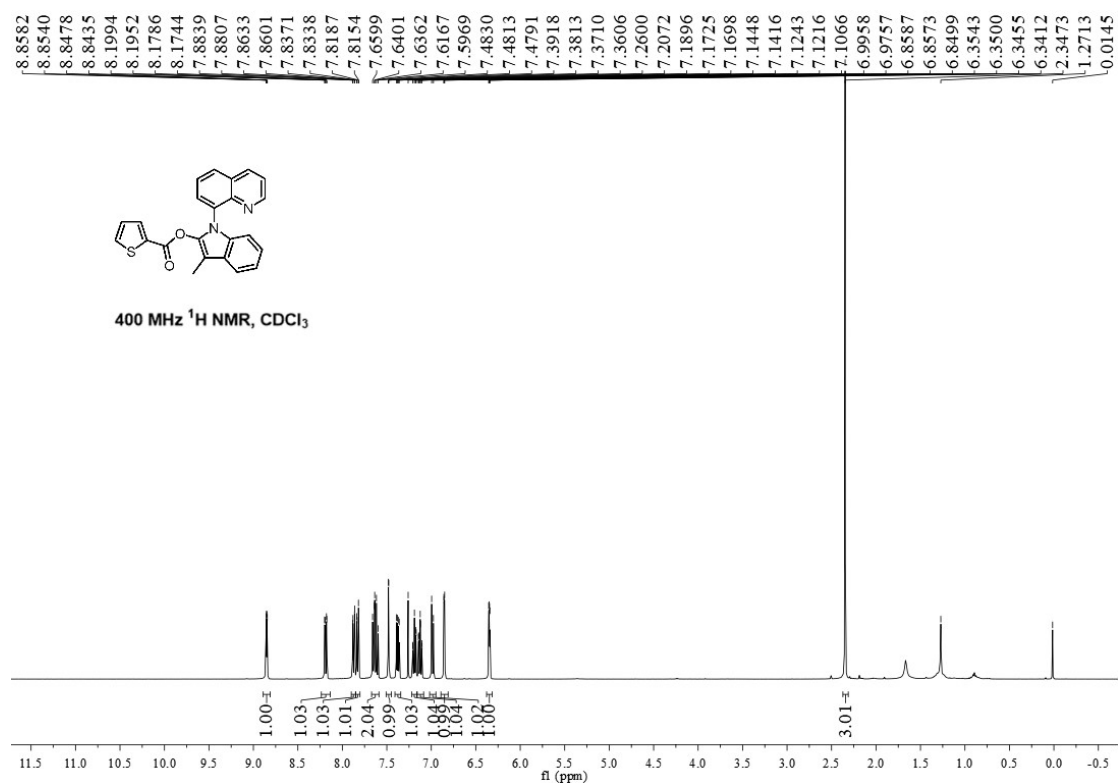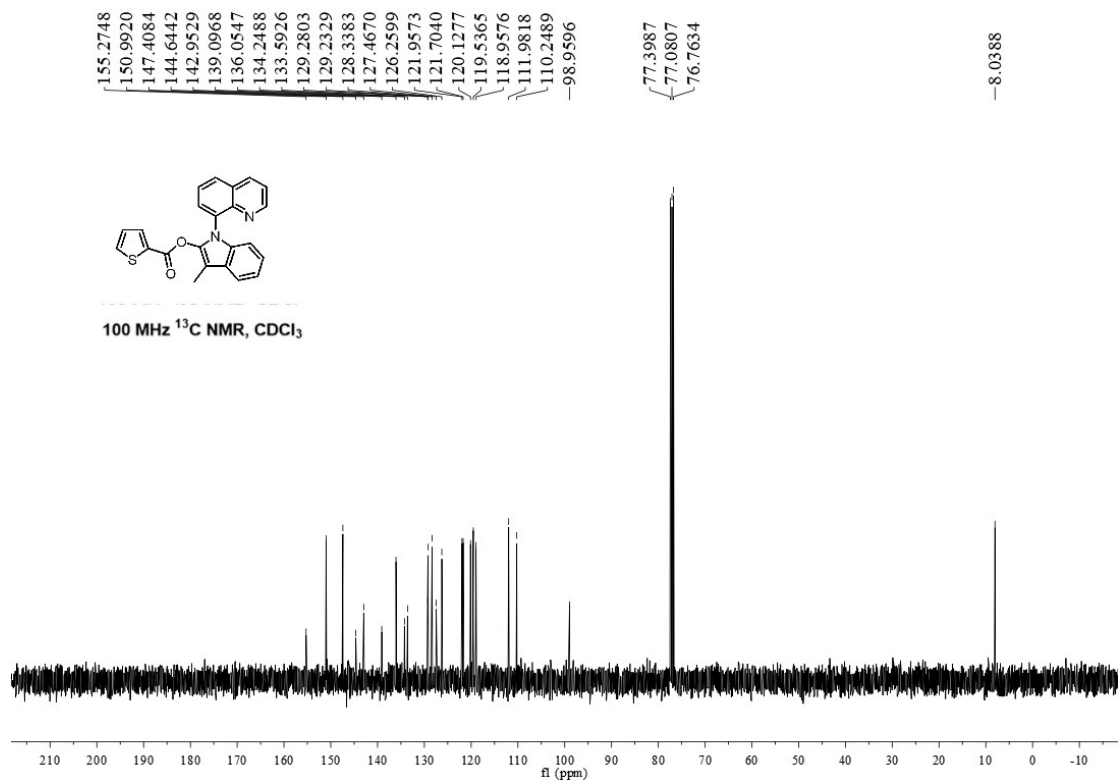

### 3-Methyl-1-(quinolin-8-yl)-1H-indol-2-yl furan-2-carboxylate (2bi)

8.8666  
8.8622  
8.8562  
8.8518  
8.8181  
8.1807  
8.1644  
8.1600  
7.8740  
7.8703  
7.8527  
7.8494  
7.8338  
7.8302  
7.6704  
7.6509  
7.6378  
7.6173  
7.5988  
7.5875  
7.5843  
7.5780  
7.5749  
7.4568  
7.4534  
7.4443  
7.4411  
7.3767  
7.3662  
7.3559  
7.3455  
7.2601  
7.2201  
7.2023  
7.1994  
7.1829  
7.1799  
7.1598  
7.1564  
7.1392  
7.1362  
7.1217  
7.1185  
7.0429  
7.0226  
6.9601  
6.9507  
6.9477  
6.9382  
2.3672

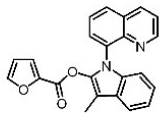

400 MHz <sup>1</sup>H NMR, CDCl<sub>3</sub>

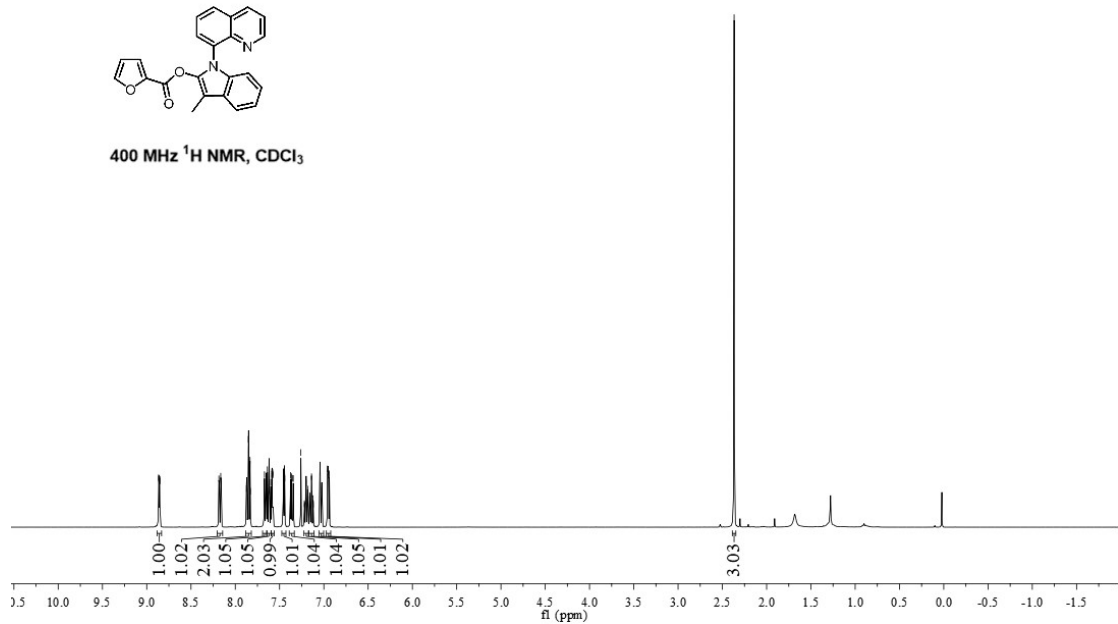

158.8504  
151.0427  
144.6288  
136.0479  
134.7770  
134.1263  
133.7729  
133.6494  
131.5635  
129.3095  
129.1504  
128.2762  
127.8360  
127.5756  
126.2392  
121.9291  
121.6957  
120.1142  
118.9556  
118.9556

-98.9437

77.4069

77.0891

76.7714

-8.1268

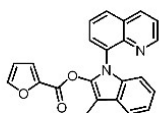

100 MHz <sup>13</sup>C NMR, CDCl<sub>3</sub>

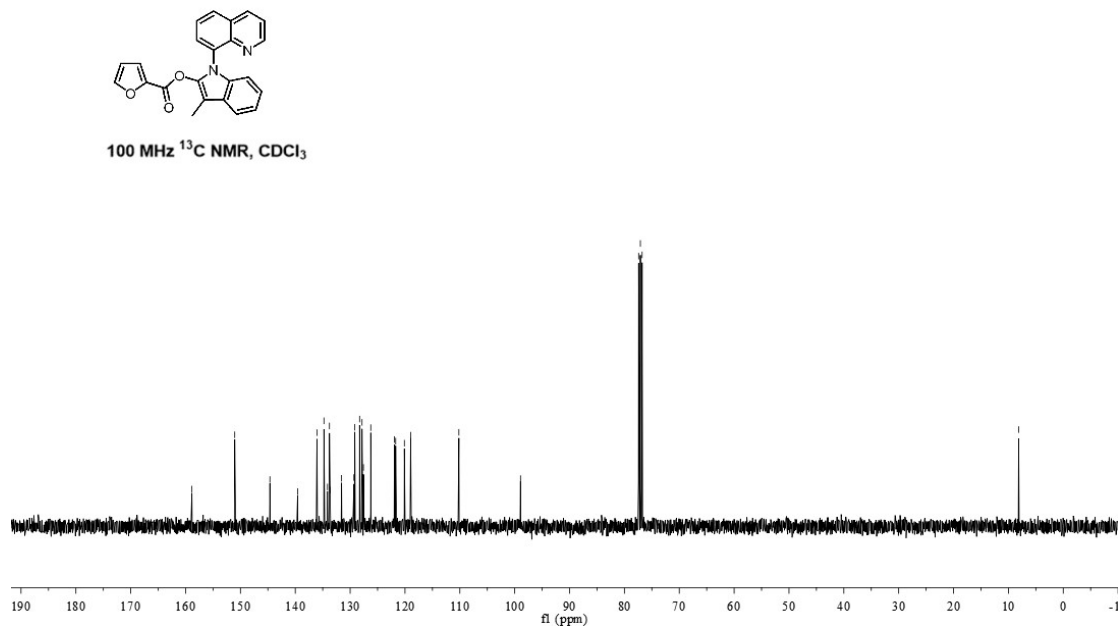

# 1-(Quinolin-8-yl)-1H-indol-2-yl cinnamate (2aj)

8.8908  
8.8865  
8.8803  
8.8759  
8.2700  
8.2656  
8.2493  
8.2450  
7.9837  
7.9802  
7.9631  
7.9596  
7.8996  
7.8961  
7.8811  
7.8776  
7.7567  
7.7251  
7.7066  
7.6910  
7.6866  
7.4472  
7.4368  
7.4265  
7.4160  
7.3899  
7.3730  
7.3619  
7.3502  
7.3406  
7.3216  
7.3061  
7.2899  
7.2842  
7.2600  
7.2017  
7.1989  
7.1836  
7.1645  
7.1616  
7.1357  
7.1324  
7.1154  
7.0975  
7.0943  
7.0072  
6.9870  
6.6997  
6.2001  
6.1602

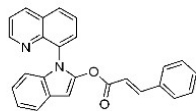

400 MHz  $^1\text{H}$  NMR,  $\text{CDCl}_3$

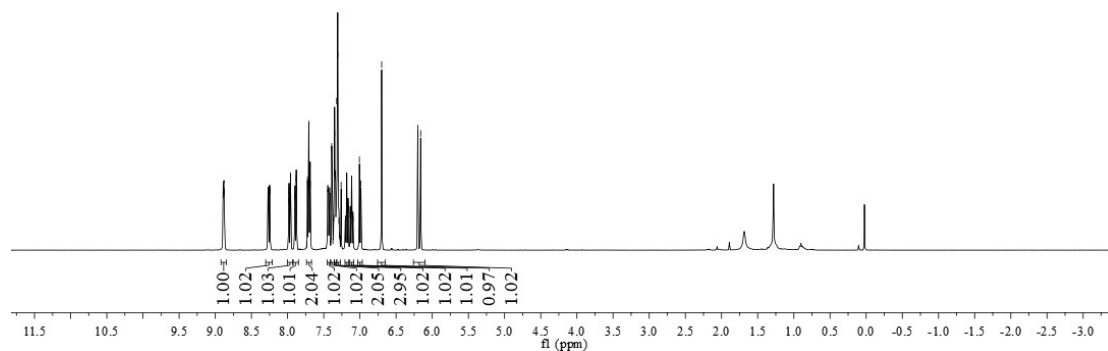

162.9314  
151.2085  
146.8895  
136.1278  
134.0615  
133.8381  
130.8252  
129.4610  
128.9196  
128.7250  
128.2398  
126.2748  
121.8911  
121.6674  
120.7846  
120.6665  
116.1990  
110.9747  
89.6986  
77.4092  
77.0944  
76.7751

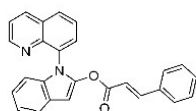

100 MHz  $^{13}\text{C}$  NMR,  $\text{CDCl}_3$

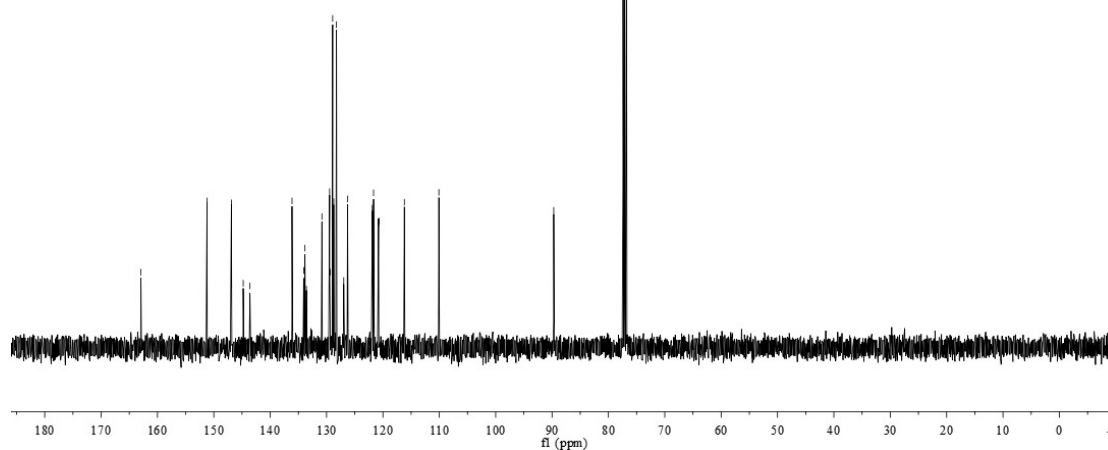

### 3-Methyl-1-(quinolin-8-yl)-1H-indol-2-yl (E)-2-methyl-3-phenylacrylate (2bk)

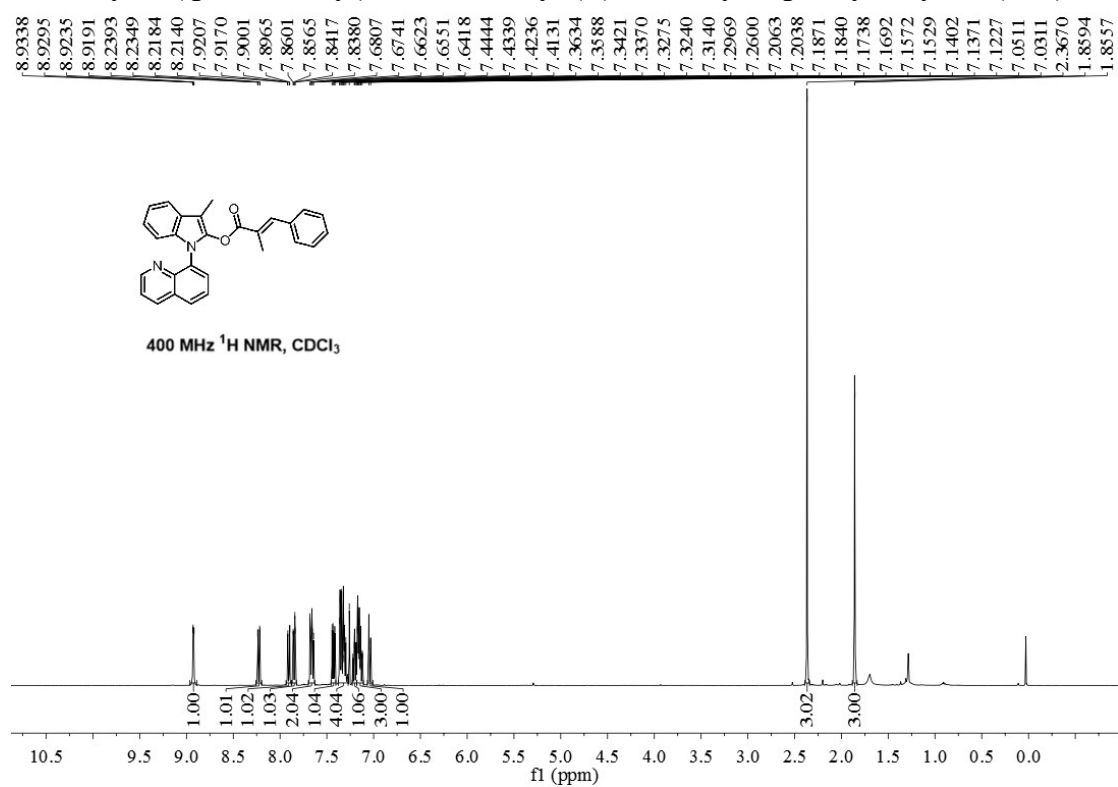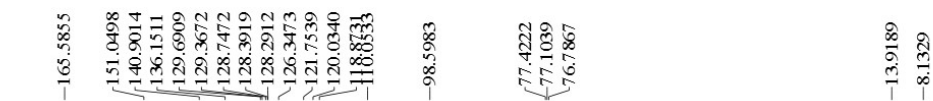



**3-Methyl-1-(quinolin-8-yl)-1H-indol-2-yl  
dimethylbutanoate (2bj)**

**2-(1,3-dioxisoindolin-2-yl)-3,3-**

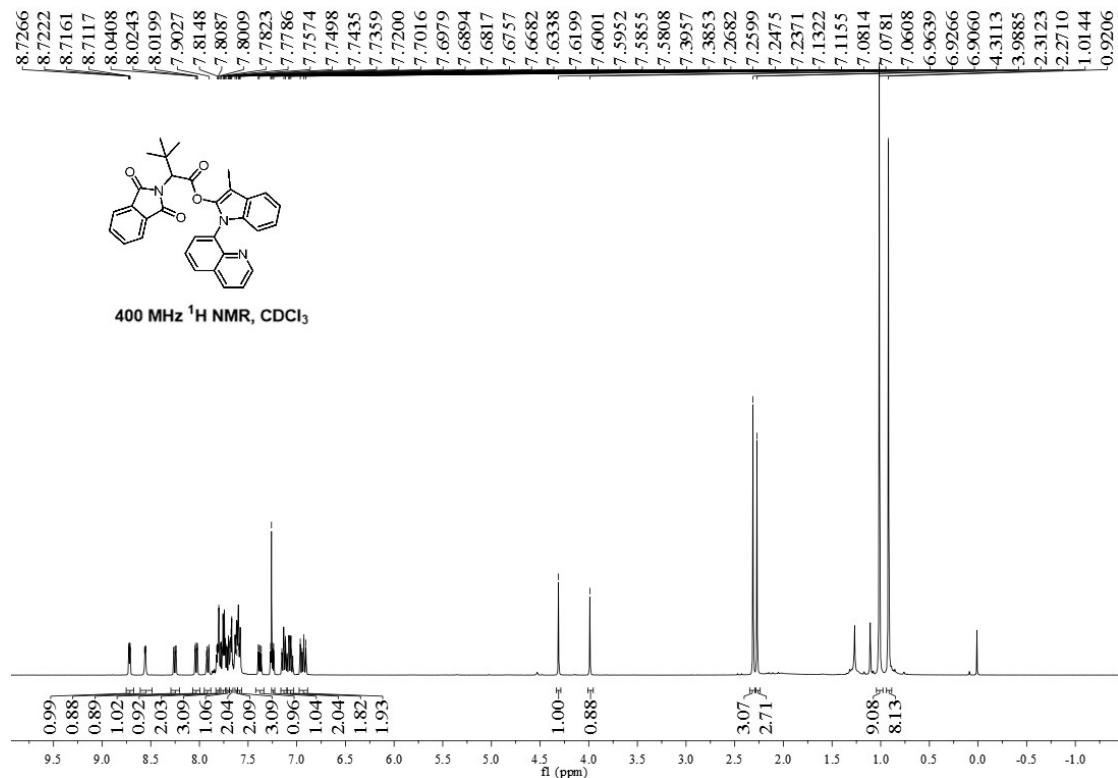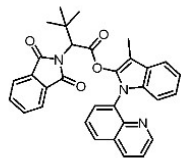

400 MHz <sup>1</sup>H NMR, CDCl<sub>3</sub>

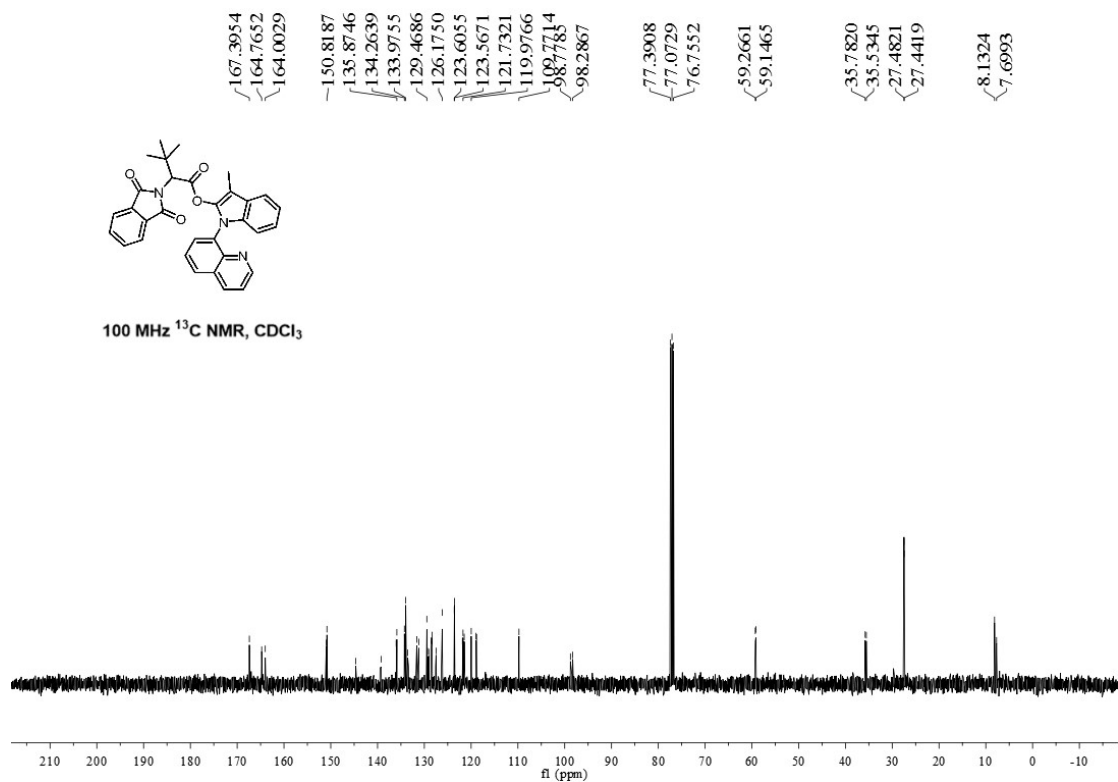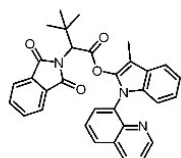

100 MHz <sup>13</sup>C NMR, CDCl<sub>3</sub>

# 1-(Quinolin-8-yl)indolin-2-one (2ag-1)

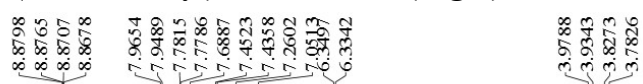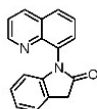

500 MHz  $^1\text{H}$  NMR,  $\text{CDCl}_3$

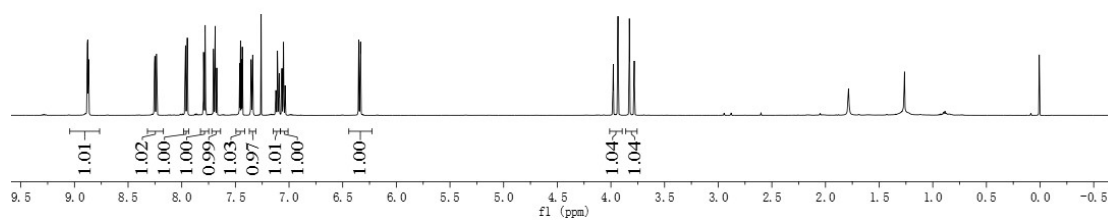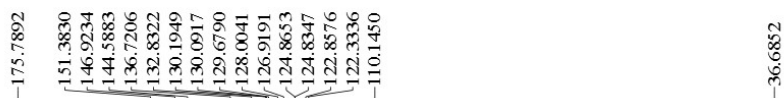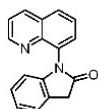

125 MHz  $^{13}\text{C}$  NMR,  $\text{CDCl}_3$

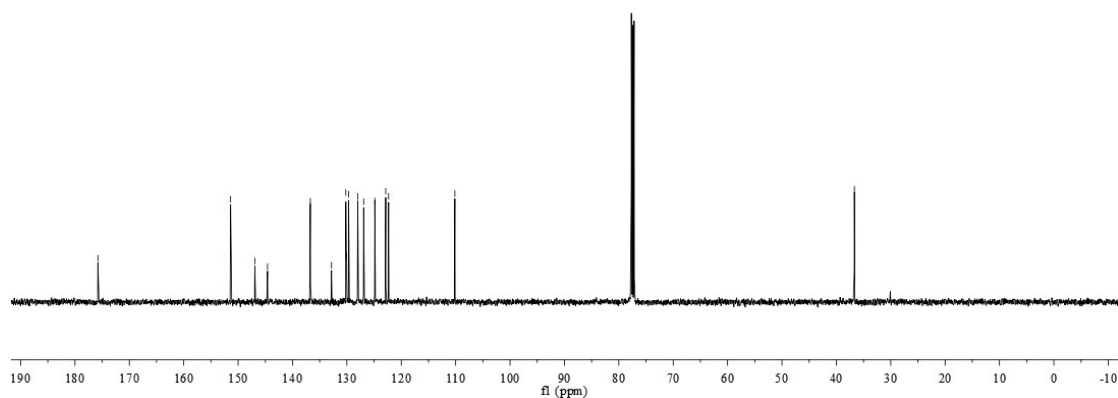

### 3,3-Dibromo-1-(quinolin-8-yl)indolin-2-one (2ag-2)

8.8616  
8.8573  
8.8510  
8.8467  
7.9826  
7.8267  
7.7085  
7.4711  
7.2601  
7.1684  
6.3256  
6.3221  
6.3179  
6.3085  
6.3032  
6.2900

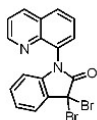

400 MHz  $^1\text{H}$  NMR,  $\text{CDCl}_3$

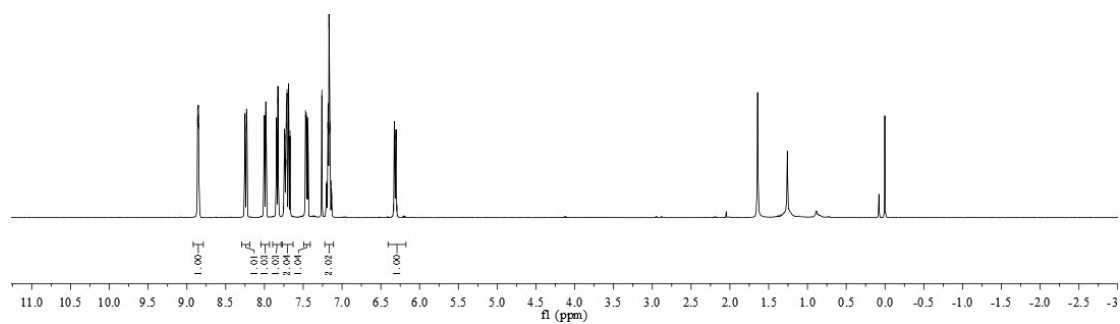

169.8939  
151.2954  
136.2008  
131.3241  
130.7680  
129.9512  
129.6705  
129.6412  
126.3855  
125.9143  
124.1218  
122.2179  
116.8549

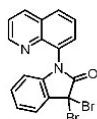

100 MHz  $^{13}\text{C}$  NMR,  $\text{CDCl}_3$

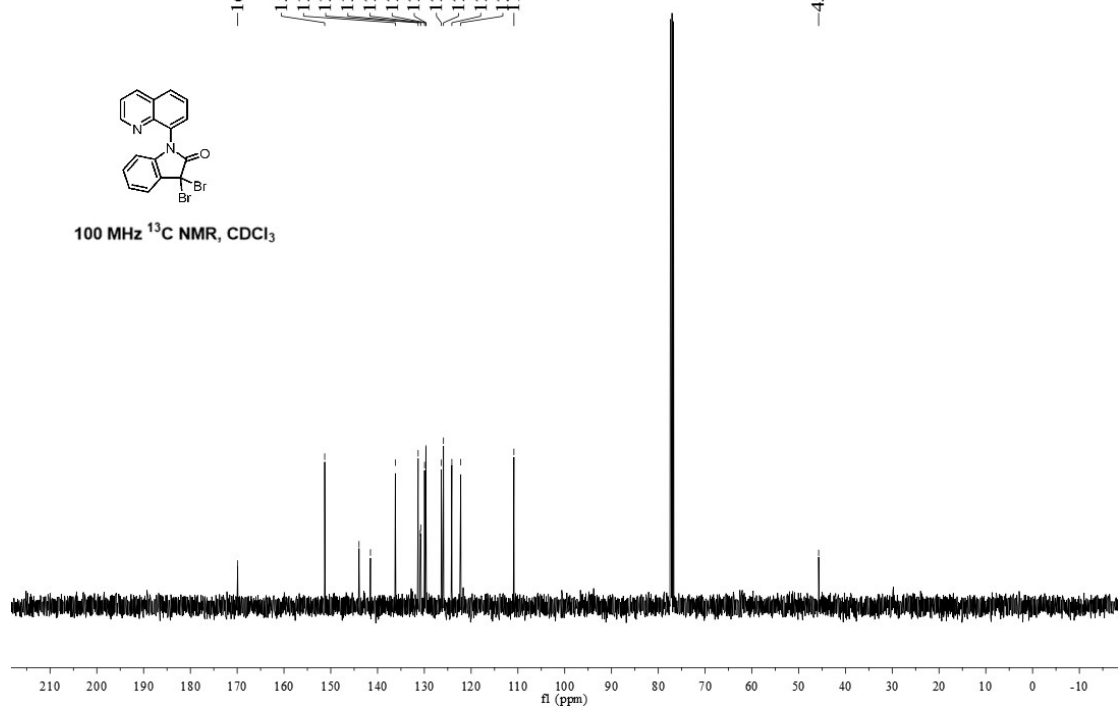

Supplement: d3cc05799b1.pdf [file d3cc05799b1.pdf]
